# Supplementary material for: Efficient synthesis of nebularine and vidarabine via dehydrazination of (hetero)aromatics catalyzed by CuSO4in water
Source: Royal Society of Chemistry journal article supplement (doi:10.1039/c3gc41658e), 2013-10-17

## Efficient Synthesis of Nebularine and Vidarabine via Dehydration of (Hetero)aromatics Catalyzed by CuSO<sub>4</sub> in Water

Ran Xia,<sup>a,b</sup> Ming-Sheng Xie,<sup>b</sup> Hong-Ying Niu,<sup>b</sup> Gui-Rong Qu<sup>a,b\*</sup>, and Hai-Ming Guo<sup>a,b\*</sup>

<sup>a</sup> School of Environment, Henan Normal University, Xinxiang, Henan province, 453007, People's Republic of China; Fax: (+86) 373-3329276; E-mail: guohm518@hotmail.com

<sup>b</sup> School of Chemistry and Chemical Engineering, Key Laboratory of Green Chemical Media and Reactions of Ministry of Education, Henan Normal University, 46 Jianshe Road, Xinxiang, 453007 (P. R. China); Fax: (+86) 373-3329276; E-mail: quguir@sina.com

|                                                                |    |
|----------------------------------------------------------------|----|
| 1. General.....                                                | 2  |
| 2. Procedures for the synthesis of starting compounds.....     | 2  |
| 3. Scalable synthesis procedure of vidarabine.....             | 3  |
| 4. Mechanism study.....                                        | 5  |
| 5. Characterization of compounds.....                          | 8  |
| 6. GC-MS of <b>4e</b> .....                                    | 19 |
| 7. <sup>1</sup> H and <sup>13</sup> C spectra of products..... | 22 |

## 1. General

Melting points were recorded with a micro melting point apparatus and uncorrected. NMR spectra were recorded with a 400 MHz spectrometer for  $^1\text{H}$  NMR, 100 MHz for  $^{13}\text{C}$  NMR. Chemical shifts  $\delta$  are given in ppm relative to the residual proton signals of the deuterated solvent  $\text{CDCl}_3$  or DMSO for  $^1\text{H}$  and  $^{13}\text{C}$  NMR. Multiplicities are reported as follows: singlet (s), doublet (d), doublet of doublets (dd), triplet (t), quartet (q), multiplet (m). High resolution mass spectra were taken with a 3000 mass spectrometer, using Waters Q-ToFMS/MS system. For column chromatography silica gel (200-300 mesh) was used as the stationary phase. All reactions were monitored by thin layer chromatography (TLC). All reagents and solvents were purchased from commercial sources and purified commonly before used.

## 2. Procedures for the synthesis of starting compounds

### 2.1 Procedures for the synthesis of 1a-1q, 3a-3b:

6-Cl Purines or 2-Cl pyridines (1.0 mmol), 80% hydrazine monohydrate (2.0 eq) and EtOH (10.0 mL) were charged in reaction vessel and heated to reflux for 2 h. After cooled to temperature, the crystal or solid precipitated. The crystal or solid was filtrated and washed with EtOH (10.0 mL), dried to afford the pure product.

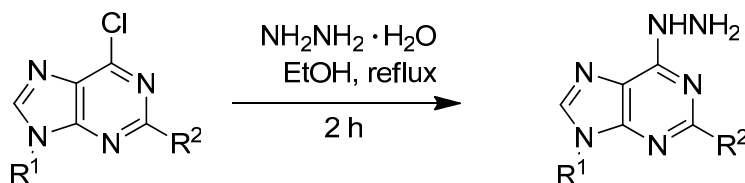

### 2.2 Procedures for the synthesis of 3i-3j:

2-I Purines (1.0 mmol), 80% hydrazine monohydrate (2.0 eq) and EtOH (10.0 mL) were charged in reaction vessel and heated to reflux for 24 h. After cooled to temperature, the crystal or solid precipitated. The crystal or solid was filtrated and

washed with EtOH (10.0 mL), dried to afford the pure product.

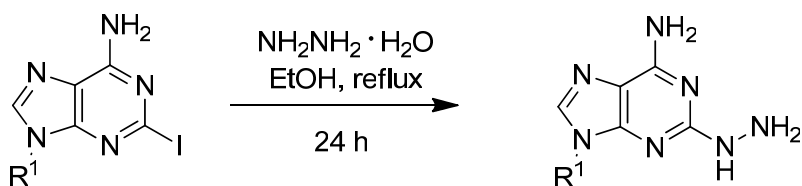

**3k** was provided by the plant producing vidarabine as an intermediate. The route by the plant is displayed as the following scheme. Other starting materials were purchased from commercial sources.

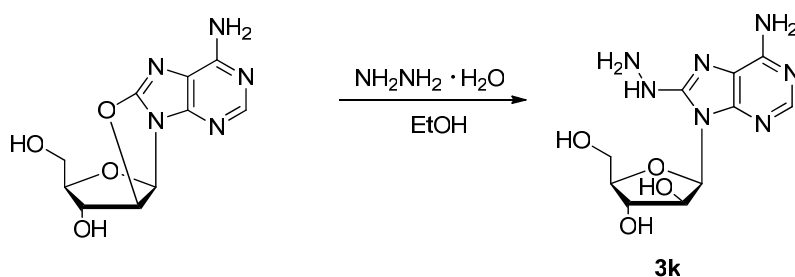

### 3. Scalable synthesis procedure of vidarabine

#### 3.1 Synthetic procedure

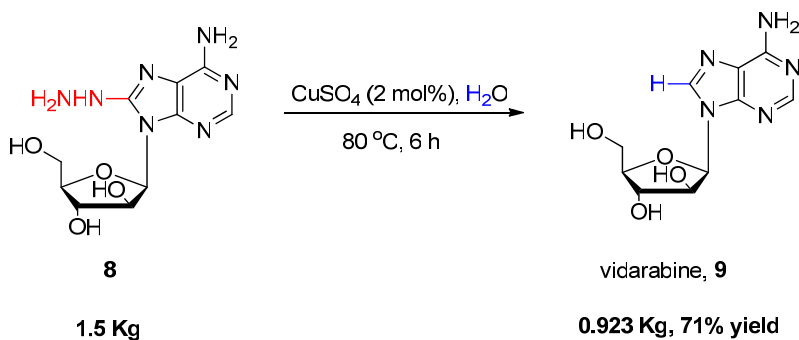

8-Hydrazine-vidarabine 1.5 Kg (**8**, 5.05 mol) and CuSO<sub>4</sub> 25 g (2 mol %) and H<sub>2</sub>O (15 L) were charged into one 100 L reaction vessel. The stirring bar is depicted as follows:

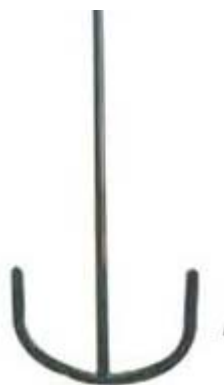

The temperature was tested by thermocouple detector, heated by hot steam and cooled by water. The mixture was stirred and heated slowly, controlling the temperature around at 80 °C ( $\pm$  5 °C) for 6 h. The gas was produced and bubbles yielded ( $N_2$  proposed). The reaction was monitored by thin layer chromatography. Upon completion, the resulting mixture was de-colored by activated carbon and filtrated. The filtrate was evaporated to 0.5 L and cooled. The product precipitated slowly, affording crude vidarabine 0.975 Kg (yield 75%). Recrystallization by water gave pure vidarabine 0.923 Kg (yield 71%).

### 3.2 The Scene photos of scable production:

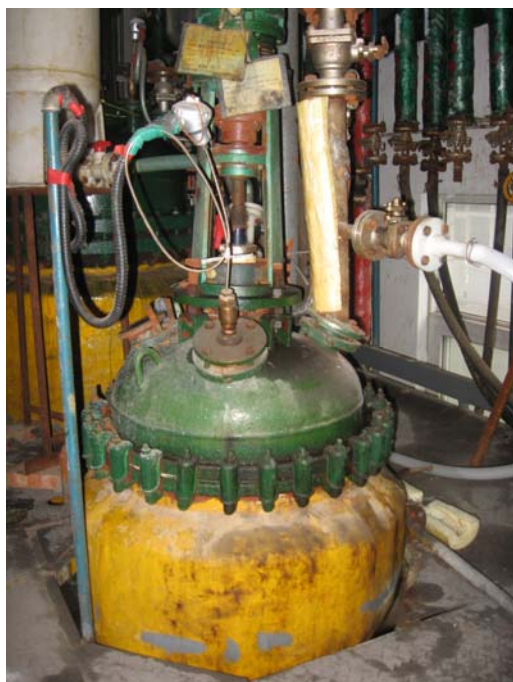

Reaction vessle 100 L

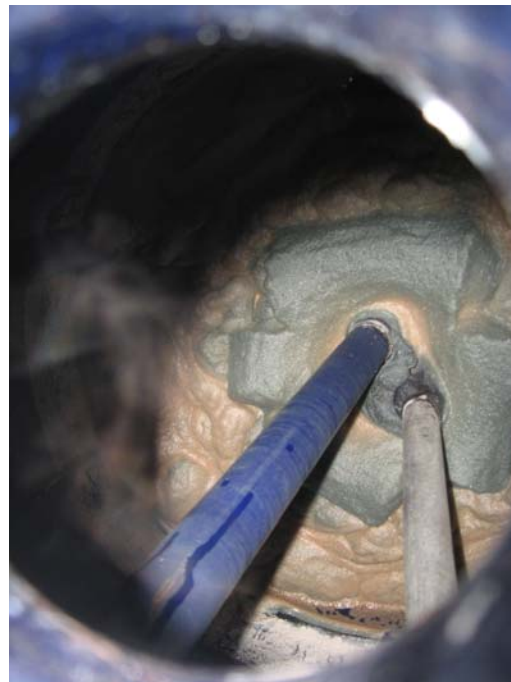

Inside of vessle

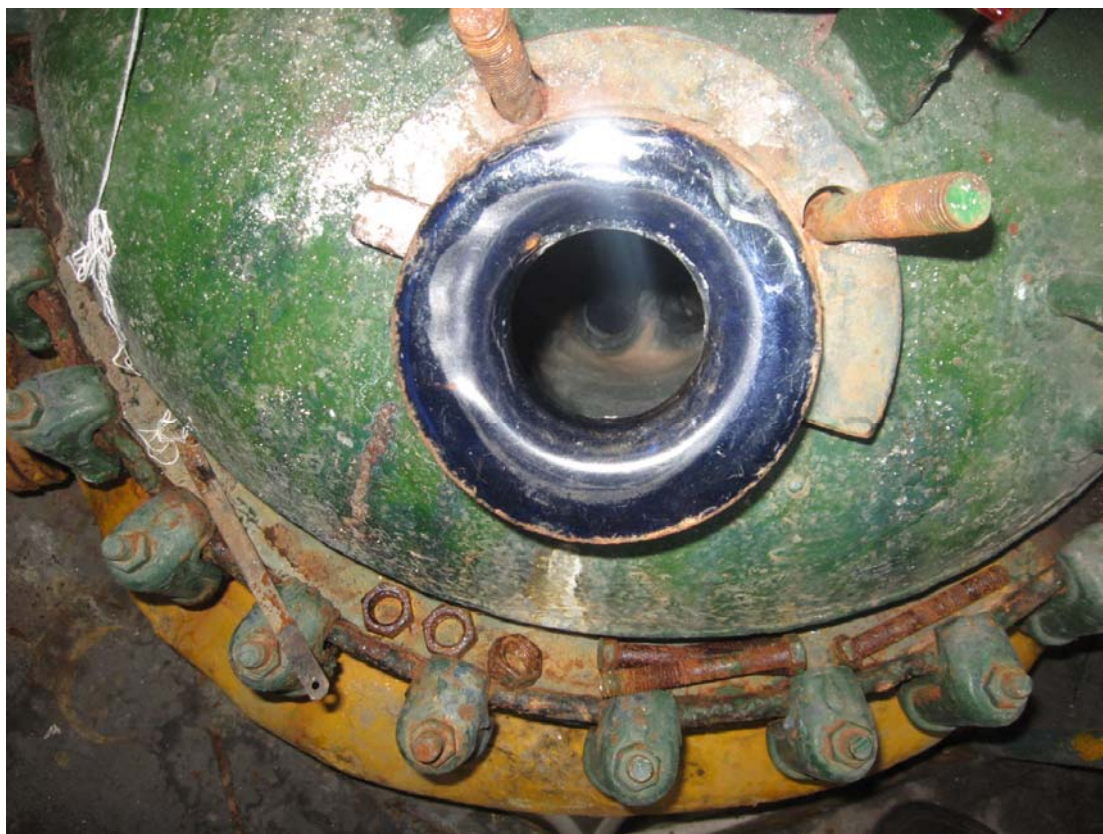

Outside of vessel

#### 4. Mechanism study

##### 4.1 The isotope effects of H/D

9-Benzyl-6-hydrazine-9*H*-purine 0.06 g (**1a**, 0.25 mmol) and CuSO<sub>4</sub> 0.0008 g (2 mol %) were dissolved in H<sub>2</sub>O (1.5 mL) and D<sub>2</sub>O (1.5 mL). The mixture was stirred at 80 °C for 6 h and monitored by thin layer chromatography. Upon completion, the resulting mixture was extracted with ethyl acetate. The organic layer was dried over Na<sub>2</sub>SO<sub>4</sub>, concentrated under reduced pressure and purified by silica gel chromatography with ethyl acetate as eluent to give **2a** (H/D).

##### 4.2 Radical scavenged experiments by TEMPO or AIBN

9-Benzyl-6-hydrazine-9*H*-purine 0.06 g (**1a**, 0.25 mmol) and CuSO<sub>4</sub> 0.0008 g (2 mol %) were dissolved in H<sub>2</sub>O (3.0 mL). TEMPO (0.05 g, 1.2 eq.) or AIBN (0.05 g, 1.2 eq.) was added. The mixture was stirred at 80 °C for 6 h and monitored by thin

layer chromatography. Upon completion, the resulting mixture was extracted with ethyl acetate. The organic layer was dried over  $\text{Na}_2\text{SO}_4$ , concentrated under reduced pressure and purified by silica gel chromatography with ethyl acetate as eluent to give **2a**. The results were shown as follows:

| scavenger          | TEMPO | AIBN |
|--------------------|-------|------|
| Yield of <b>2a</b> | 81%   | 85%  |

#### 4.3 The air was replaced by $\text{K}_2\text{S}_2\text{O}_8$ as oxidant under $\text{N}_2$ atmosphere

9-Benzyl-6-hydrazine-9*H*-purine 0.06 g (**1a**, 0.25 mmol) and  $\text{CuSO}_4$  0.0008 g (2 mol %) were dissolved in  $\text{H}_2\text{O}$  (3.0 mL).  $\text{K}_2\text{S}_2\text{O}_8$  (0.135 g, 2.0 eq.) was added. The mixture was charged under  $\text{N}_2$  atmosphere and stirred at 80 °C for 6 h and monitored by thin layer chromatography. Upon completion, the resulting mixture was extracted with ethyl acetate. The organic layer was dried over  $\text{Na}_2\text{SO}_4$ , concentrated under reduced pressure and purified by silica gel chromatography with ethyl acetate as eluent to give **2a** (yield: 56%).

#### 4.4 The control experiments in anhydrous conditions----testing the source of H atom in new formed C-H bonds

##### 4.4.1 solvent-free process

**a)** 9-Benzyl-6-hydrazine-9*H*-purine 0.06 g (**1a**, 0.25 mmol),  $\text{CuSO}_4$  0.0008 g (2 mol %) and  $\text{K}_2\text{S}_2\text{O}_8$  (0.135 g, 2.0 eq.) were grinded thoroughly and charged in reaction vessel. The mixture was stirred at 80 °C for 6 h under  $\text{N}_2$  and anhydrous condition. Thin layer chromatography showed no reaction occurred.

**b)** 9-Benzyl-6-hydrazine-9*H*-purine 0.06 g (**1a**, 0.25 mmol) and  $\text{CuSO}_4$  0.0008 g (2 mol %) were grinded thoroughly and charged in reaction vessel. The mixture was stirred at 80 °C for 6 h under air and anhydrous condition. Thin layer chromatography showed no reaction occurred.

#### 4.4.2 Anhydrous dioxane as solvent

9-Benzyl-6-hydrazine-9*H*-purine 0.06 g (**1a**, 0.25 mmol), CuSO<sub>4</sub> 0.0008 g (2 mol %) and anhydrous dioxane (3.0 mL) were charged in reaction vessel. The mixture was stirred at 80 °C for 6 h under air and anhydrous condition. Thin layer chromatography showed no reaction occurred.



## 5. Characterization of compounds

### 9-Benzyl-9H-purine (2a)

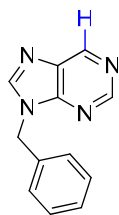

White solid. m.p. 90-92 °C.  $^1\text{H}$  NMR (400 MHz,  $\text{CDCl}_3$ )  $\delta$  9.13 (s, 1H), 9.00 (s, 1H), 8.07 (s, 1H), 7.34-7.27 (m, 5H), 5.43 (s, 2H);  $^{13}\text{C}$  NMR (100 MHz,  $\text{CDCl}_3$ )  $\delta$  152.8, 151.5, 148.6, 145.2, 134.9, 133.9, 129.2, 128.7, 127.9, 47.2; HRMS calcd for  $\text{C}_{12}\text{H}_{11}\text{N}_4$   $[\text{M}+\text{H}^+]$  211.0978, found 211.0970.

### 3-(9H-Purin-9-yl)propanenitrile (2b)

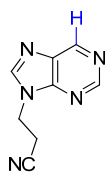

White solid. m.p. 138-140 °C.  $^1\text{H}$  NMR ( $\text{DMSO}-d_6$ , 400 MHz)  $\delta$  9.18 (s, 1H), 8.96 (s, 1H), 8.66 (s, 1H), 4.58 (t,  $J = 6.8$  Hz, 2H), 3.22 (t,  $J = 6.4$  Hz, 2H);  $^{13}\text{C}$  NMR ( $\text{DMSO}-d_6$ , 100 MHz)  $\delta$  18.4, 118.7, 134.0, 147.2, 148.5, 151.5, 152.6; HRMS calcd for  $\text{C}_8\text{H}_7\text{NaN}_5$   $[\text{M}+\text{Na}^+]$  196.0594, found 196.0614.

### 9-Allyl-9H-purine (2c)

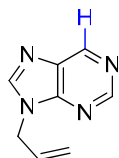

White solid. m.p. 50-52 °C.  $^1\text{H}$  NMR ( $\text{CDCl}_3$ , 400 MHz)  $\delta$  9.16 (s, 1H), 8.99 (s, 1H), 8.11 (s, 1H), 6.00-6.08 (m, 1H), 5.34 (d,  $J = 9.6$  Hz, 1H), 5.24 (d,  $J = 17.2$  Hz, 1H);  $^{13}\text{C}$  NMR ( $\text{CDCl}_3$ , 100 MHz)  $\delta$  45.7, 119.6, 131.2, 148.7, 152.7; HRMS calcd for  $\text{C}_8\text{H}_9\text{N}_4$   $[\text{M}+\text{H}^+]$  161.0822, found 161.0834.



**9-[2,3-O-(1-methylethylidene)- $\beta$ -D-ribofuranosyl]-9H-purine (2d)**

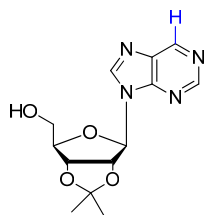

Colorless oil.  $^1\text{H}$  NMR ( $\text{CDCl}_3$ , 400 MHz)  $\delta$  9.21 (s, 1H), 8.98 (s, 1H), 8.18 (s, 1H), 5.97 (d,  $J = 4.8$  Hz, 1H), 5.46 (d,  $J = 10.4$  Hz, 1H), 5.24 (t,  $J = 6.4$  Hz, 1H), 5.13 (d,  $J = 6.4$  Hz, 1H), 4.56 (s, 1H), 3.98 (d,  $J = 12.4$  Hz, 1H), 3.82 (t,  $J = 11.2$  Hz, 1H), 1.66 (s, 3H), 1.38 (s, 3H);  $^{13}\text{C}$  NMR ( $\text{CDCl}_3$ , 100 MHz)  $\delta$  18.4, 25.2, 27.6, 58.4, 63.3, 81.5, 82.9, 86.1, 94.1, 114.3, 135.7, 144.9, 149.9, 152.1; HRMS calcd for  $\text{C}_{13}\text{H}_{16}\text{N}_4\text{NaO}_4$  [ $\text{M}+\text{Na}^+$ ] 315.1064, found 315.1068.

**9-(2,3,5-Tri-O-acetyl- $\beta$ -D-ribofuranosyl)-9H-purine (2e)**

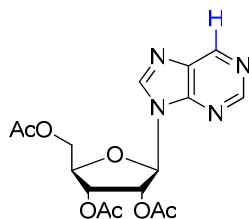

Oil.  $^1\text{H}$  NMR ( $\text{CDCl}_3$ , 400 MHz)  $\delta$  9.17 (s, 1H), 9.00 (s, 1H), 8.27 (s, 1H), 6.26 (d,  $J = 5.2$  Hz, 1H), 5.97 (s, 1H), 5.67 (s, 1H), 4.47-4.35 (m, 3H), 2.15 (s, 3H), 2.11 (s, 3H), 2.07 (s, 3H);  $^{13}\text{C}$  NMR ( $\text{CDCl}_3$ , 100 MHz)  $\delta$  170.3, 169.6, 169.4, 152.8, 151.0, 149.0, 143.8, 134.6, 86.5, 80.4, 73.1, 70.5, 63.0, 20.8, 20.6, 20.4; HRMS calcd for  $\text{C}_{16}\text{H}_{19}\text{N}_4\text{O}_7$  [ $\text{M}+\text{H}^+$ ] 379.1248, found 379.1247.

**9-(2-Deoxy-3,5-di-O-acetyl- $\beta$ -D-ribofuranosyl)-9H-purine (2f)**

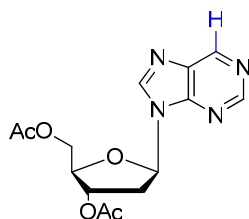

Oil.  $^1\text{H}$  NMR ( $\text{CDCl}_3$ , 400 MHz)  $\delta$  9.13 (s, 1H), 8.96 (s, 1H), 8.34 (s, 1H), 6.48 (t,  $J = 5.2$  Hz, 1H), 5.40 (d,  $J = 6$  Hz, 1H), 4.35-4.28 (m, 3H), 3.02-2.95 (m, 1H), 2.65-2.60

(m, 1H), 2.07 (s, 3H), 2.00 (s, 3H);  $^{13}\text{C}$  NMR ( $\text{CDCl}_3$ , 100 MHz)  $\delta$  170.4, 170.3, 152.0, 151.1, 148.0, 144.3, 134.4, 84.8, 82.7, 74.3, 63.6, 37.4, 20.9, 20.8; HRMS calcd for  $\text{C}_{14}\text{H}_{16}\text{N}_4\text{NaO}_5$  [ $\text{M}+\text{Na}^+$ ] 343.1013, found 343.1014.

**9-(2,3,5-Tri-O-acetyl- $\beta$ -D-arabinofuranosyl)-9H-purine (2g)**

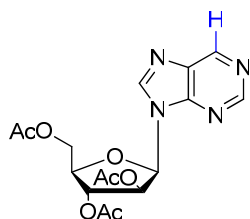

Oil.  $^1\text{H}$  NMR ( $\text{CDCl}_3$ , 400 MHz)  $\delta$  9.19 (s, 1H), 9.03 (s, 1H), 8.41 (s, 1H), 6.67 (t,  $J$  = 4.8 Hz, 1H), 5.48 (t,  $J$  = 2.8 Hz, 1H), 5.39 (t,  $J$  = 3.6 Hz, 1H), 4.44-4.24 (m, 3H), 2.09 (s, 3H), 2.04 (s, 3H), 1.79 (s, 3H);  $^{13}\text{C}$  NMR ( $\text{CDCl}_3$ , 100 MHz)  $\delta$  170.5, 169.6, 168.7, 151.5, 146.9, 145.7, 133.3, 83.2, 80.2, 75.6, 74.8, 62.8, 20.7, 20.6, 20.2; HRMS calcd for  $\text{C}_{16}\text{H}_{18}\text{N}_4\text{NaO}_7$  [ $\text{M}+\text{Na}^+$ ] 401.1068, found 401.1060.

**9-(2,3,5-Tri-O-benzoyl- $\beta$ -D-ribofuranosyl)-9H-purine (2h)**

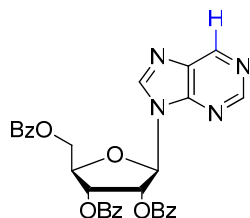

Brown oil.  $^1\text{H}$  NMR ( $\text{CDCl}_3$ , 400 MHz)  $\delta$  9.16 (s, 1H), 8.86 (s, 1H), 8.41 (s, 1H), 8.05-7.87 (m, 6H), 7.56-7.26 (m, 10H), 6.53 (d,  $J$  = 5.2 Hz, 1H), 6.42 (t,  $J$  = 5.2 Hz, 1H), 6.26 (t,  $J$  = 5.2 Hz, 1H), 4.94-4.84 (m, 2H), 4.72-4.68 (m, 1H);  $^{13}\text{C}$  NMR ( $\text{CDCl}_3$ , 100 MHz)  $\delta$  171.1, 166.0, 165.3, 165.1, 151.6, 151.5, 147.5, 145.2, 134.4, 133.9, 133.8, 133.5, 129.8, 19.7, 129.3, 128.6, 128.5, 128.2, 87.3, 80.9, 73.9, 71.3, 63.3, 60.3; HRMS calcd for  $\text{C}_{31}\text{H}_{25}\text{N}_4\text{O}_7$  [ $\text{M}+\text{H}^+$ ] 565.1718, found 565.1719.

**9-Benzyl-2-chloro-9H-purine (2i)**

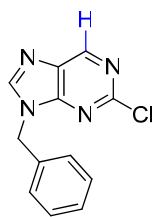

White solid. m.p. 120-122 °C.  $^1\text{H}$  NMR ( $\text{CDCl}_3$ , 400 MHz)  $\delta$  9.02 (s, 1H), 8.09 (s, 1H), 7.26-7.39 (m, 5H), 5.42 (s, 2H);  $^{13}\text{C}$  NMR ( $\text{CDCl}_3$ , 100 MHz)  $\delta$  154.7, 150.2, 134.3, 129.3, 128.9, 128.1, 47.5; HRMS calcd for  $\text{C}_{12}\text{H}_9\text{ClNaN}_4$  [ $\text{M}+\text{Na}^+$ ] 267.0408, found 267.0414.

### 9-Allyl-2-chloro-9H-purine (2j)

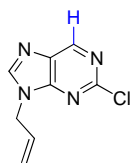

White solid. m.p. 66-68 °C.  $^1\text{H}$  NMR ( $\text{CDCl}_3$ , 400 MHz)  $\delta$  8.96 (s, 1H), 8.09 (s, 1H), 5.97-6.07 (m, 1H), 5.35 (d,  $J = 6.0$  Hz, 1H), 5.25 (d,  $J = 17.2$  Hz, 1H), 4.86 (d,  $J = 6.4$  Hz, 2H);  $^{13}\text{C}$  NMR ( $\text{CDCl}_3$ , 100 MHz)  $\delta$  45.8, 120.1, 130.8, 133.0, 145.8, 150.2, 153.0, 154.5; HRMS calcd for  $\text{C}_8\text{H}_8\text{ClN}_4$  [ $\text{M}+\text{H}^+$ ] 195.0432, found 195.0439.

### 2-Chloro-9-(2,3,5-tri-*O*-acetyl- $\beta$ -*D*-ribofuranosyl)-9H-purine (2k)

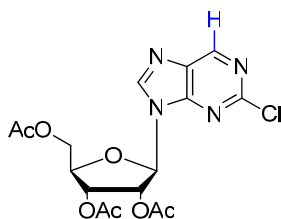

Brown oil.  $^1\text{H}$  NMR ( $\text{CDCl}_3$ , 400 MHz)  $\delta$  8.95 (s, 1H), 8.26 (s, 1H), 8.05-7.87 (m, 6H), 6.21 (d,  $J = 5.6$  Hz, 1H), 5.78 (t,  $J = 5.6$  Hz, 1H), 5.56 (t,  $J = 4.8$  Hz, 1H), 4.44-4.35 (m, 3H), 2.11 (s, 3H), 2.08 (s, 3H), 2.03 (s, 3H);  $^{13}\text{C}$  NMR ( $\text{CDCl}_3$ , 100 MHz)  $\delta$  170.3, 169.6, 169.4, 154.7, 152.7, 150.6, 144.2, 133.6, 86.1, 80.6, 73.1, 70.5, 62.9, 20.8, 20.5, 20.4; HRMS calcd for  $\text{C}_{16}\text{H}_{17}\text{ClN}_4\text{NaO}_7$  [ $\text{M}+\text{Na}^+$ ] 435.0678, found 435.0671.

### 2-Fluoro-9-(2,3,5-tri-*O*-acetyl- $\beta$ -*D*-ribofuranosyl)-9*H*-purine (2l)

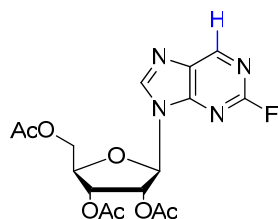

Brown color oil.  $^1\text{H}$  NMR ( $\text{CDCl}_3$ , 400 MHz)  $\delta$  8.26 (s, 1H), 8.07 (s, 1H), 6.17 (d,  $J = 5.6$  Hz, 1H), 5.82 (t,  $J = 5.2$  Hz, 1H), 5.57 (d,  $J = 4.8$  Hz, 1H), 4.44-4.36 (m, 3H), 2.12 (s, 3H), 2.10 (s, 3H), 2.04 (s, 3H);  $^{13}\text{C}$  NMR ( $\text{CDCl}_3$ , 100 MHz)  $\delta$  170.4, 169.6, 169.4, 159.9, 157.7, 153.4, 153.3, 153.2, 153.1, 151.5, 151.3, 151.2, 144.4, 144.3, 133.4, 133.3, 86.2, 80.6, 73.0, 70.5, 62.8, 20.7, 20.5, 20.3; HRMS calcd for  $\text{C}_{16}\text{H}_{17}\text{FN}_4\text{NaO}_7$  [ $\text{M}+\text{Na}^+$ ] 419.0973, found 419.0964.

### 2-Fluoro-9-(2,3,5-Tri-*O*-acetyl- $\beta$ -*D*-arabinofuranosyl)-9*H*-purine (2m)

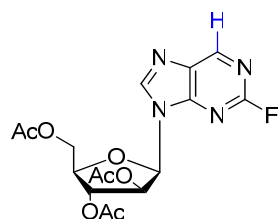

Oil.  $^1\text{H}$  NMR ( $\text{CDCl}_3$ , 400 MHz)  $\delta$  8.90 (s, 1H), 8.27 (s, 1H), 6.55 (d,  $J = 4.4$  Hz, 1H), 5.47-5.45 (m, 1H), 5.34 (t,  $J = 2.8$  Hz, 1H), 4.46-4.27 (m, 2H), 4.26-4.23 (m, 1H), 2.12 (s, 3H), 2.08 (s, 3H), 1.86 (s, 3H);  $^{13}\text{C}$  NMR ( $\text{CDCl}_3$ , 100 MHz)  $\delta$  170.5, 169.6, 168.5, 159.9, 157.7, 153.3, 153.1, 151.2, 151.0, 144.9, 144.8, 132.5, 132.4, 83.1, 80.3, 75.7, 74.7, 62.7, 20.7, 20.6, 20.2; HRMS calcd for  $\text{C}_{16}\text{H}_{18}\text{FN}_4\text{O}_7$  [ $\text{M}+\text{H}^+$ ] 397.1154, found 397.1158.

### 9-Benzyl-9H-purin-2-amine (2n)

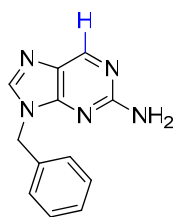

White solid. m.p. 150-152 °C.  $^1\text{H}$  NMR ( $\text{CDCl}_3$ , 400 MHz)  $\delta$  8.71 (s, 1H), 7.71 (s, 1H), 7.25-7.71 (m, 5H), 5.26 (s, 2H), 5.13 (s, 2H);  $^{13}\text{C}$  NMR ( $\text{CDCl}_3$ , 100 MHz)  $\delta$  46.5, 127.7, 128.4, 129.0, 135.4, 142.3, 149.9, 160.0; HRMS calcd for  $\text{C}_{12}\text{H}_{11}\text{NaN}_5$   $[\text{M}+\text{Na}^+]$  248.0907, found 248.0924.

### 9-Allyl-9H-purin-2-amine (2o)

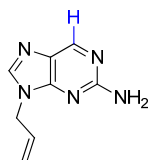

White solid. m.p. 86-88 °C.  $^1\text{H}$  NMR ( $\text{CDCl}_3$ , 400 MHz)  $\delta$  8.75 (s, 1H), 7.89 (s, 1H), 5.95-6.04 (m, 1H), 5.28 (d,  $J = 10.4$  Hz, 1H), 5.15-5.21 (m, 3H), 4.69 (d,  $J = 5.2$  Hz, 2H);  $^{13}\text{C}$  NMR ( $\text{CDCl}_3$ , 100 MHz)  $\delta$  160.0, 149.7, 149.6, 131.4, 118.7, 45.3, 29.7, 23.0, 11.2; HRMS calcd for  $\text{C}_8\text{H}_{10}\text{N}_5$   $[\text{M}+\text{H}^+]$  176.0931, found 176.0940.

### 2-Chloro-9H-purine (2p)

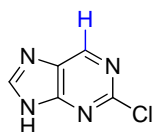

Yellow solid. m.p. 214-216 °C.  $^1\text{H}$  NMR ( $\text{DMSO}-d_6$ , 400 MHz)  $\delta$  13.63 (brs, 1H), 9.04 (s, 1H), 8.69 (s, 1H);  $^{13}\text{C}$  NMR ( $\text{DMSO}-d_6$ , 100 MHz)  $\delta$  154.5, 152.0, 148.2, 146.7, 129.7; HRMS calcd for  $\text{C}_5\text{H}_4\text{ClN}_4$   $[\text{M}+\text{H}^+]$  155.0119, found 155.0127.

### 3-Nitropyridine (4a, 4b)

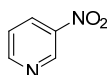

Oil.  $^1\text{H}$  NMR ( $\text{CDCl}_3$ , 400 MHz)  $\delta$  8.54-8.45 (m, 2H), 7.63-7.61 (m, 1H), 7.22-7.18

(m, 1H);  $^{13}\text{C}$  NMR ( $\text{CDCl}_3$ , 100 MHz)  $\delta$  148.9, 147.5, 135.8, 132.1, 124.3.

### 1,3-Dinitrobenzene (4c)

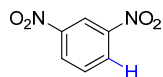

White solid. m.p. 88-90 °C.  $^1\text{H}$  NMR ( $\text{CDCl}_3$ , 400 MHz)  $\delta$  9.08-9.05 (m, 1H), 8.60-8.58 (m, 2H), 7.85-7.81 (m, 1H);  $^{13}\text{C}$  NMR ( $\text{CDCl}_3$ , 100 MHz)  $\delta$  130.8, 128.9, 119.1.

### Nitrobenzene (4d)

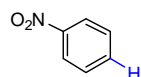

Oil.  $^1\text{H}$  NMR ( $\text{CDCl}_3$ , 400 MHz)  $\delta$  8.26 (t,  $J = 1.2$  Hz, 2H), 7.71 (t,  $J = 7.6$  Hz, 1H), 7.58-7.54 (m, 2H);  $^{13}\text{C}$  NMR ( $\text{CDCl}_3$ , 100 MHz)  $\delta$  134.6, 129.3, 123.5.

### Anisole (4f)

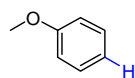

Oil.  $^1\text{H}$  NMR ( $\text{CDCl}_3$ , 400 MHz)  $\delta$  7.32-7.28 (m, 2H), 6.98-6.91 (m, 3H), 3.82 (s, 3H);  $^{13}\text{C}$  NMR ( $\text{CDCl}_3$ , 100 MHz)  $\delta$  (ppm) 129.5, 120.7, 113.9, 55.2.

### Benzo[d]thiazole (4g)

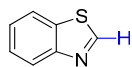

Oil.  $^1\text{H}$  NMR ( $\text{CDCl}_3$ , 400 MHz)  $\delta$  8.06 (s, 1H), 7.79-7.62 (m, 1H), 7.57-7.55 (m, 1H), 7.39-7.32 (m, 2H);  $^{13}\text{C}$  NMR ( $\text{CDCl}_3$ , 100 MHz)  $\delta$  152.5, 150.0, 140.0, 125.6, 124.6, 120.6, 111.0.

### 4-(Trifluoromethyl)pyrimidine (4h)

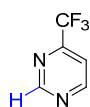

Oil.  $^1\text{H}$  NMR ( $\text{CDCl}_3$ , 400 MHz)  $\delta$  8.60 (d,  $J = 4.8$  Hz, 1H), 7.67 (s, 1H), 7.05 (d,  $J =$

5.2 Hz, 1H);  $^{13}\text{C}$  NMR ( $\text{CDCl}_3$ , 100 MHz)  $\delta$  177.3, 163.2, 160.8, 157.0, 121.6, 118.9, 108.8, 108.7.

### Adenosine (4i)

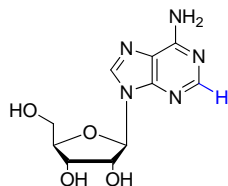

White solid. m.p. 234-236 °C.  $^1\text{H}$  NMR ( $\text{DMSO}-d_6$ , 400 MHz)  $\delta$  8.34 (s, 1H), 8.13 (s, 1H), 7.35 (s, 1H), 5.88 (d,  $J = 6.4$  Hz, 1H), 5.47-5.44 (m, 2H), 5.21 (d,  $J = 4.4$  Hz, 1H), 4.62-4.58 (m, 1H), 4.15-4.12 (m, 1H), 3.97-3.95 (m, 1H), 3.69-3.64 (m, 1H), 3.57-3.52 (m, 1H);  $^{13}\text{C}$  NMR ( $\text{DMSO}-d_6$ , 100 MHz)  $\delta$  156.6, 152.9, 149.5, 140.4, 119.8, 88.4, 86.4, 73.9, 71.2, 62.2; HRMS calcd for  $\text{C}_{10}\text{H}_{13}\text{N}_5\text{NaO}_4$  [ $\text{M}+\text{Na}^+$ ] 290.0860, found 290.0863.

### 9-(2,3,5-Tri-O-acetyl- $\beta$ -D-adenosine (4j)

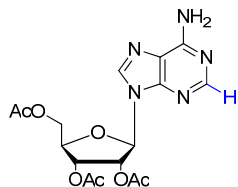

White solid. m.p. 168-170 °C.  $^1\text{H}$  NMR ( $\text{CDCl}_3$ , 400 MHz)  $\delta$  8.33 (s, 1H), 7.95 (s, 1H), 6.17 (d,  $J = 5.2$  Hz, 1H), 5.92 (t,  $J = 5.2$  Hz, 1H), 5.66 (t,  $J = 4.4$  Hz, 1H), 4.45-4.33 (m, 3H), 2.12 (s, 3H), 2.09 (s, 3H), 2.06 (s, 3H);  $^{13}\text{C}$  NMR ( $\text{CDCl}_3$ , 100 MHz)  $\delta$  170.3, 169.6, 169.4, 155.6, 153.0, 149.7, 138.9, 120.1, 86.3, 80.3, 73.2, 70.7, 63.1, 20.7, 20.5, 20.4.; HRMS calcd for  $\text{C}_{16}\text{H}_{20}\text{N}_5\text{O}_7$  [ $\text{M}+\text{H}^+$ ] 394.1357, found 394.1358.



### 9- $\beta$ -D-Ribofuranosyl-9H-purine (7)

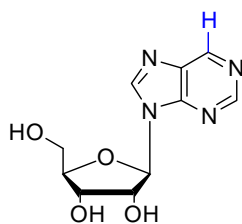

White solid. m.p. 182-184 °C.  $^1\text{H}$  NMR (DMSO- $d_6$ , 400 MHz)  $\delta$  9.19 (s, 1H), 8.95 (s, 1H), 8.86 (s, 1H), 6.04 (d,  $J$  = 5.6 Hz, 1H), 4.59 (t,  $J$  = 5.2 Hz, 1H), 4.18 (t,  $J$  = 4.0 Hz, 1H), 3.96 (t,  $J$  = 4.4 Hz, 1H), 3.69-3.54 (m, 2H);  $^{13}\text{C}$  NMR (DMSO- $d_6$ , 100 MHz)  $\delta$  152.6, 151.4, 148.7, 145.9, 134.6, 88.1, 86.2, 74.3, 70.7, 61.7; HRMS calcd for  $\text{C}_{10}\text{H}_{12}\text{N}_4\text{NaO}_4$  [ $\text{M}+\text{Na}^+$ ] 275.0751, found 275.0745.

### Vidarabine (9)

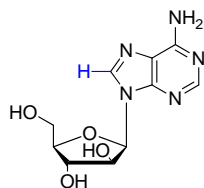

White solid. m.p. 264-266 °C.  $^1\text{H}$  NMR (DMSO- $d_6$ , 400 MHz)  $\delta$  8.18 (s, 1H), 8.12 (s, 1H), 7.24 (s, 2H), 6.25 (d,  $J$  = 4.4 Hz, 1H), 5.64 (d,  $J$  = 4.4 Hz, 1H), 5.56 (t,  $J$  = 3.6 Hz, 1H), 5.13 (t,  $J$  = 4.4 Hz, 1H), 4.13 (brs, 2H), 3.79-3.76 (m, 1H), 3.69-3.61 (m, 2H);  $^{13}\text{C}$  NMR (DMSO- $d_6$ , 100 MHz)  $\delta$  156.3, 152.9, 149.8, 140.8, 118.7, 84.5, 84.0, 76.1, 75.4, 61.3; HRMS calcd for  $\text{C}_{10}\text{H}_{13}\text{N}_5\text{NaO}_4$  [ $\text{M}+\text{Na}^+$ ] 290.0860, found 290.0857.

### 2-D-3-Nitropyridine (5a)

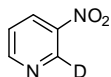

Oil.  $^1\text{H}$  NMR ( $\text{CDCl}_3$ , 400 MHz)  $\delta$  8.61-8.60 (m, 1H), 8.23-8.21 (m, 1H), 7.49-7.46 (m, 1H);  $^{13}\text{C}$  NMR ( $\text{CDCl}_3$ , 100 MHz)  $\delta$  152.5, 143.4, 134.3, 123.1.

### 2-D-5-Nitropyridine (5b)

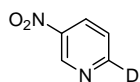

Oil.  $^1\text{H}$  NMR ( $\text{CDCl}_3$ , 400 MHz)  $\delta$  9.22 (d,  $J = 2.8$  Hz, 1H), 8.46-8.43 (m, 1H), 7.56 (d,  $J = 8.8$  Hz, 1H);  $^{13}\text{C}$  NMR ( $\text{CDCl}_3$ , 100 MHz)  $\delta$  157.1, 145.5, 143.3, 13.7, 124.9.

### 1-D-2,4-Dinitrobenzene (5c)

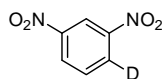

Oil.  $^1\text{H}$  NMR ( $\text{CDCl}_3$ , 400 MHz)  $\delta$  8.68 (d,  $J = 2.4$  Hz, 1H), 8.13-8.10 (m, 1H), 7.59 (d,  $J = 6.0$  Hz, 1H);  $^{13}\text{C}$  NMR ( $\text{CDCl}_3$ , 100 MHz)  $\delta$  130.6, 128.7, 118.9.

### 2-Deuterium adenosine (5d)

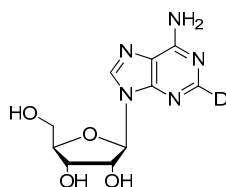

White solid. m.p. 236-238 °C.  $^1\text{H}$  NMR ( $\text{DMSO-}d_6$ , 400 MHz)  $\delta$  8.36 (s, 1H), 7.82 (brs, 2H), 5.81 (d,  $J = 6.0$  Hz, 1H), 5.46 (d,  $J = 6.0$  Hz, 1H), 5.19 (d,  $J = 4.8$  Hz, 1H), 5.05 (t,  $J = 5.6$  Hz, 1H), 4.51 (q,  $J_1 = 11.2$  Hz,  $J_2 = 5.6$  Hz, 1H), 4.12 (d,  $J = 3.2$  Hz, 1H), 3.94 (d,  $J = 2.8$  Hz, 1H), 3.67-3.51 (m, 2H);  $^{13}\text{C}$  NMR ( $\text{DMSO-}d_6$ , 100 MHz)  $\delta$  156.6, 152.9, 149.5, 140.4, 119.8, 88.4, 86.4, 73.9, 71.1, 62.2; HRMS calcd for  $\text{C}_{10}\text{H}_{13}\text{DN}_5\text{O}_4$  [ $\text{M}+\text{H}^+$ ] 269.1103, found 269.1107.

### 9-Benzyl-6-D-9H-purine (5e)

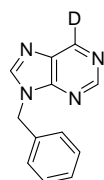

White solid. m.p. 82-86 °C.  $^1\text{H}$  NMR ( $\text{CDCl}_3$ , 400 MHz)  $\delta$  9.03 (s, 1H), 8.09 (s, 1H), 7.30-7.37 (m, 5H), 5.46 (s, 2H);  $^{13}\text{C}$  NMR ( $\text{CDCl}_3$ , 100 MHz)  $\delta$  152.1, 151.1, 148.7, 145.0, 134.5, 131.4, 129.2, 128.8, 127.9, 47.8; HRMS calcd for  $\text{C}_{12}\text{H}_{10}\text{DN}_4$  [ $\text{M}+\text{H}^+$ ]

212.1041, found 212.1048.

**2-Deuterium-9-(2,3,5-Tri-O-acetyl- $\beta$ -D-adenosine (5f)**

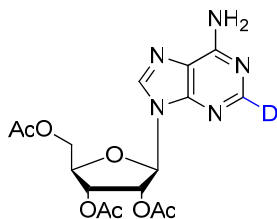

White solid. m.p. 168-170 °C.  $^1\text{H}$  NMR ( $\text{CDCl}_3$ , 400 MHz):  $\delta$  8.95 (s, 1H), 8.26 (s, 1H), 6.21 (d,  $J = 5.6$  Hz, 1H), 5.78 (d,  $J = 5.6$  Hz, 1H), 5.56 (d,  $J = 4.8$  Hz, 1H), 4.44-4.35 (m, 3H), 2.11 (s, 3H), 2.08 (s, 3H), 2.03 (s, 3H);  $^{13}\text{C}$  NMR ( $\text{CDCl}_3$ , 100 MHz)  $\delta$  170.4, 169.7, 169.5, 156.3, 154.5, 150.7, 138.8, 118.6, 85.9, 80.5, 73.3, 70.7, 63.1, 20.8, 20.6, 20.5; HRMS calcd for  $\text{C}_{16}\text{H}_{18}\text{DN}_5\text{NaO}_7$  [ $\text{M}+\text{Na}^+$ ] 417.1239, found 417.1242.

## 6. GC-MS of 4e

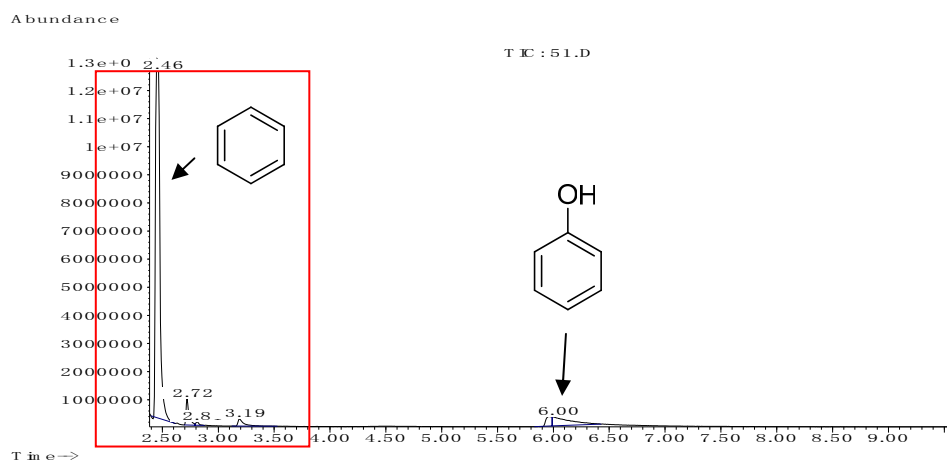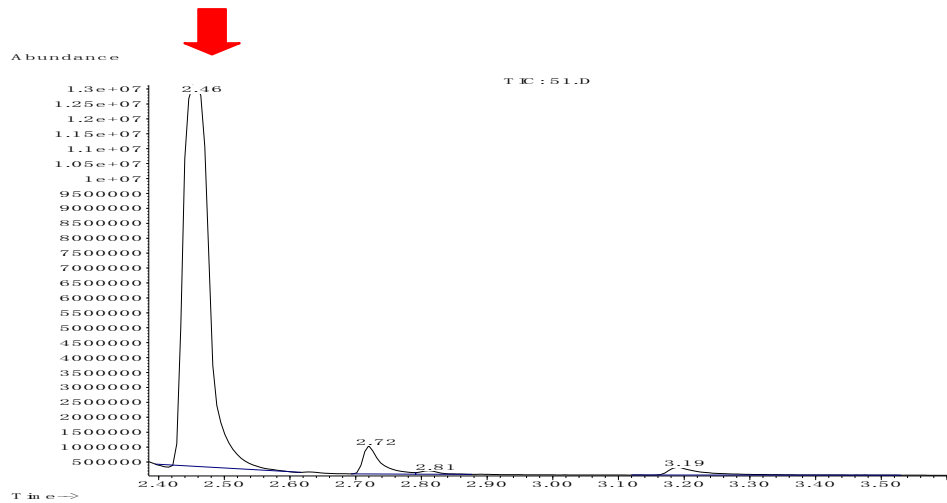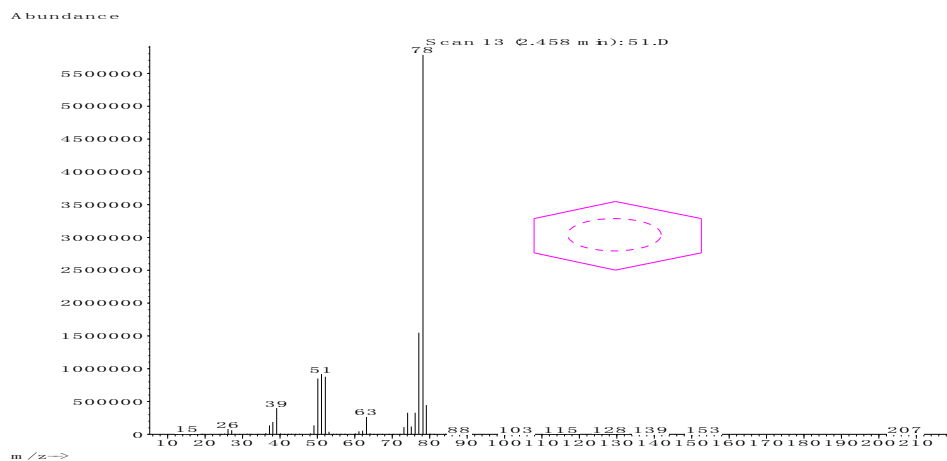

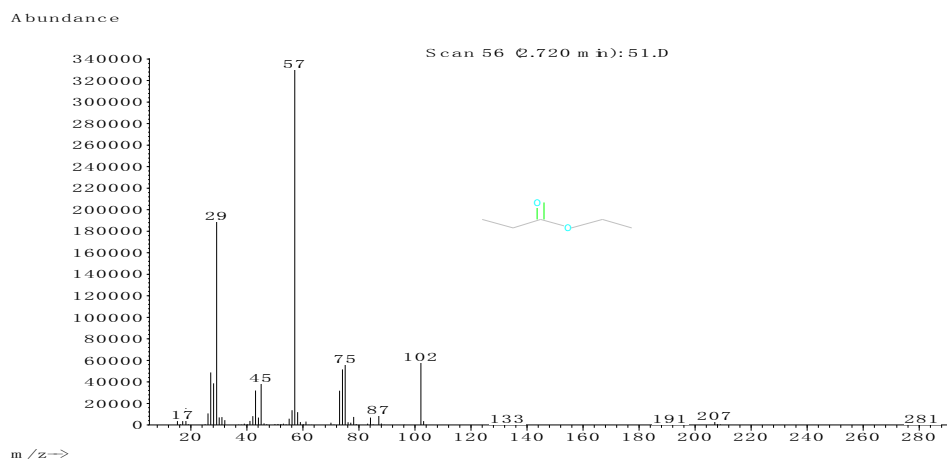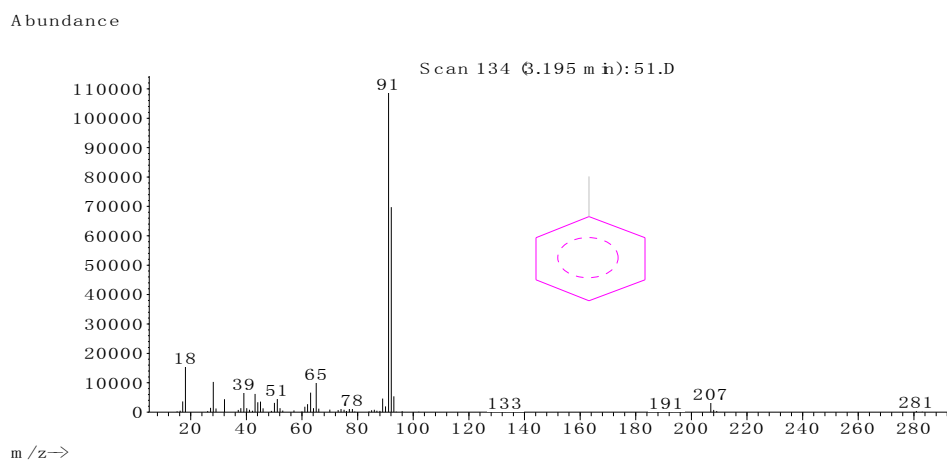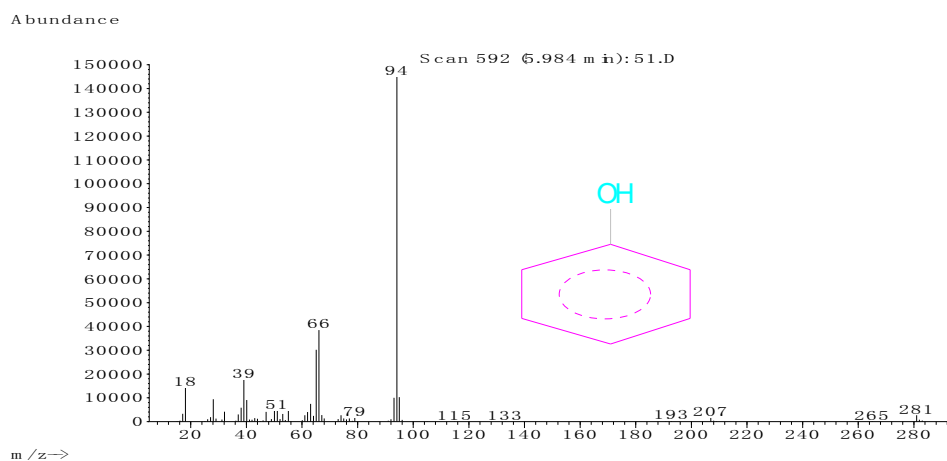

**GC-MS of 4e report:**

Area Percent Report

Data File : D:\MSDCHEM\1\DATA\QUGUIRONG\51.D Vial: 1  
Acq On : 18 Jul 2013 11:21 Operator:  
Sample : Inst : Instrumen  
Misc : Multiplr: 1.00  
Sample Amount: 0.00

MS Integration Params: AUTOINT1.E

Method : E:\MSDCHEM\1\METHODS\DEFAULT.M (Chemstation Integrator)  
Title :

Signal : TIC

| peak # | R.T. min | first scan | max scan | last scan | PK TY | peak height | corr. area | corr. % max. | % of total |
|--------|----------|------------|----------|-----------|-------|-------------|------------|--------------|------------|
| 1      | 2.458    | 3          | 13       | 39        | BV 2  | 12781526    | 347844689  | 100.00%      | 82.189%    |
| 2      | 2.720    | 52         | 56       | 68        | PV    | 906701      | 17217572   | 4.95%        | 4.068%     |
| 3      | 2.811    | 68         | 71       | 82        | VV    | 116044      | 2331221    | 0.67%        | 0.551%     |
| 4      | 3.195    | 122        | 134      | 189       | BB    | 260427      | 9589622    | 2.76%        | 2.266%     |
| 5      | 5.965    | 567        | 589      | 593       | BV 4  | 338632      | 11177443   | 3.21%        | 2.641%     |
| 6      | 5.996    | 593        | 594      | 665       | VV 2  | 319978      | 35066387   | 10.08%       | 8.285%     |

Sum of corrected areas: 423226936

## 7. $^1\text{H}$ and $^{13}\text{C}$ spectra of products

### $^1\text{H}$ NMR Spectrum for 2a:

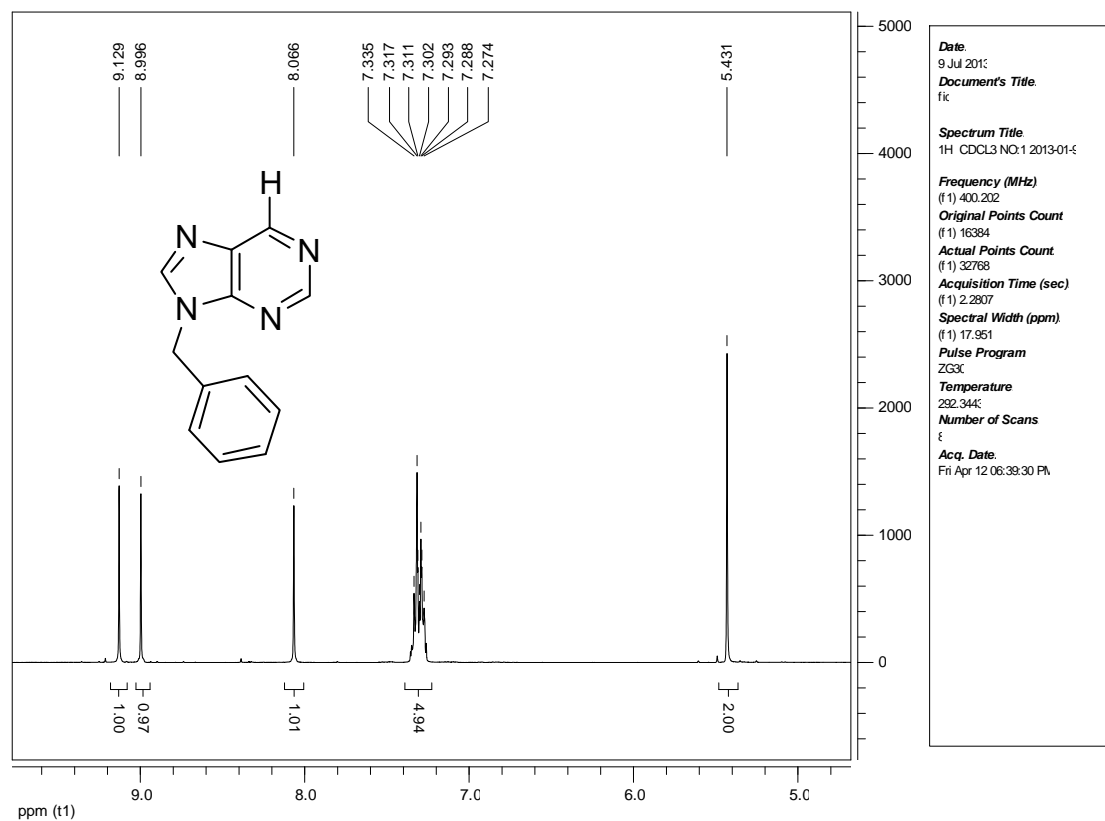

### $^{13}\text{C}$ NMR Spectrum for 2a

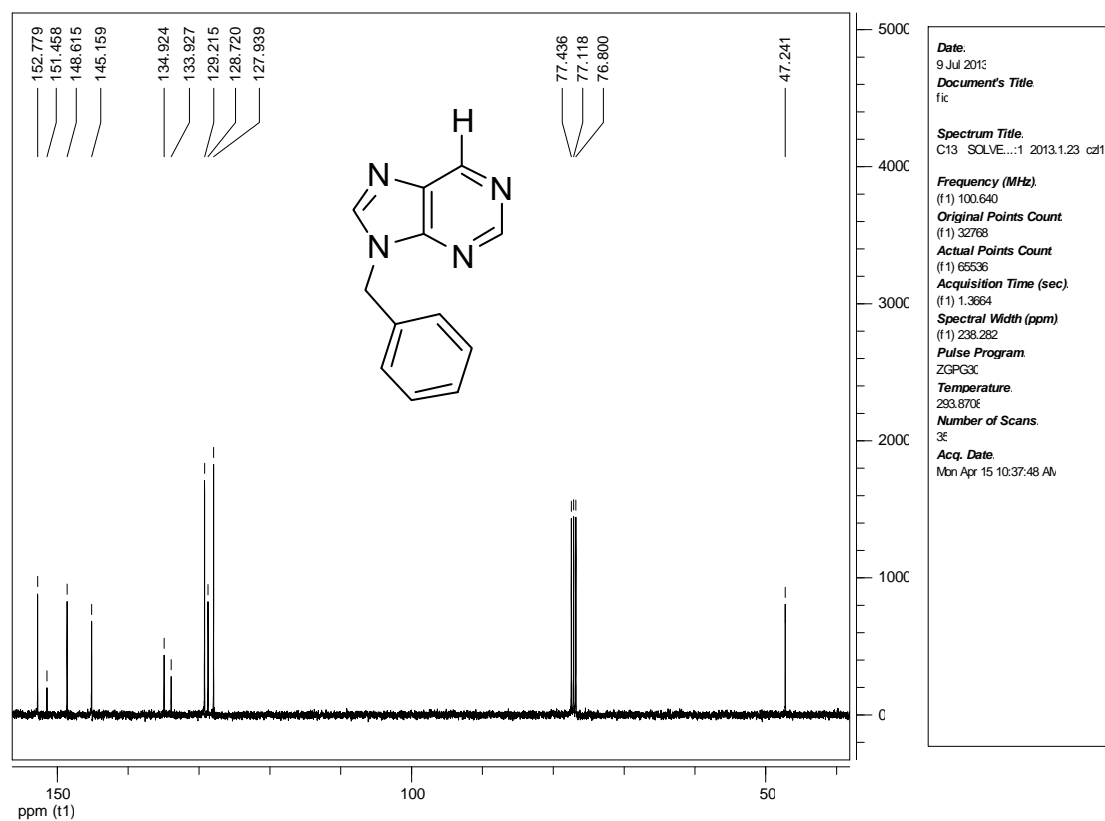



### <sup>1</sup>H NMR Spectrum for 2b

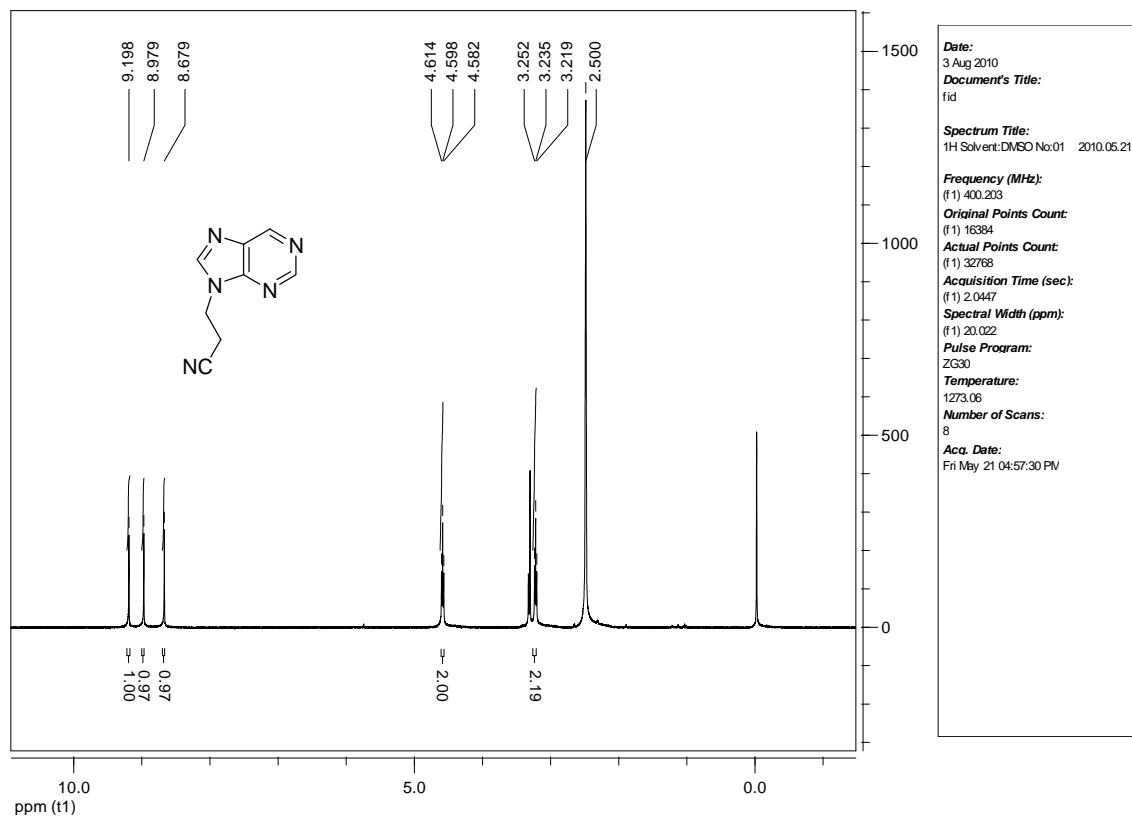

### <sup>13</sup>C NMR Spectrum for 2b

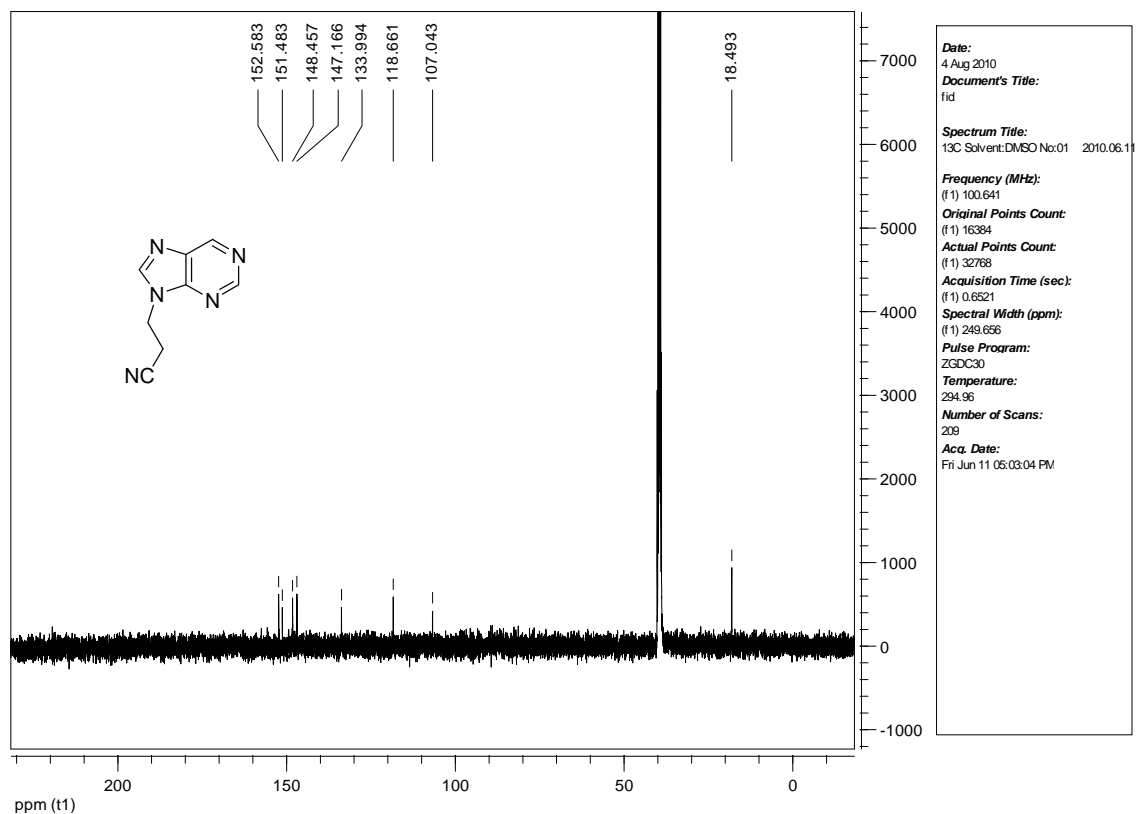

### <sup>1</sup>H NMR Spectrum for 2c

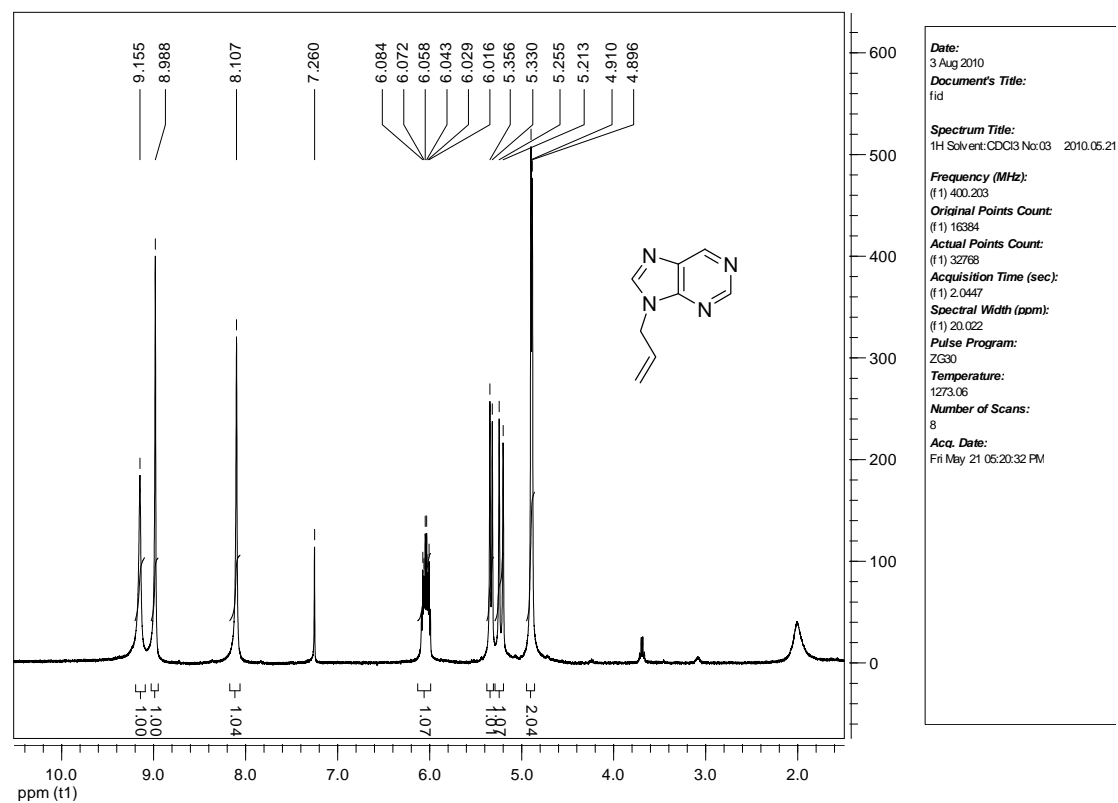

### <sup>13</sup>C NMR Spectrum for 2c

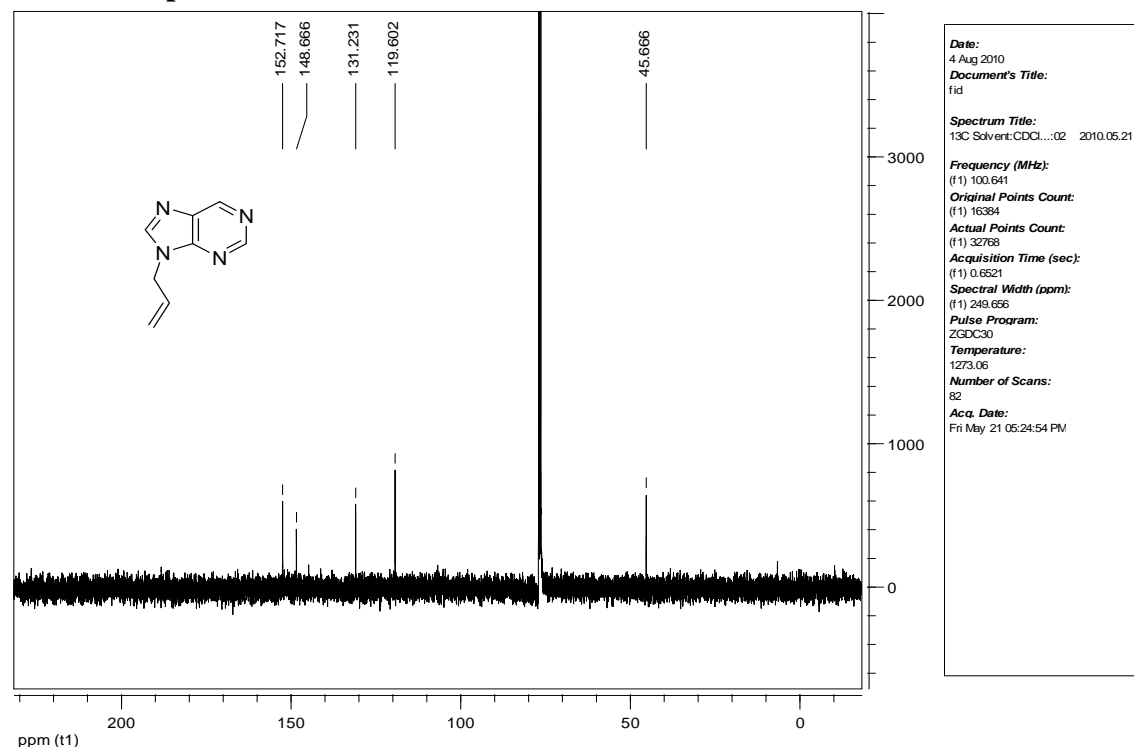

### <sup>1</sup>H NMR Spectrum for 2d

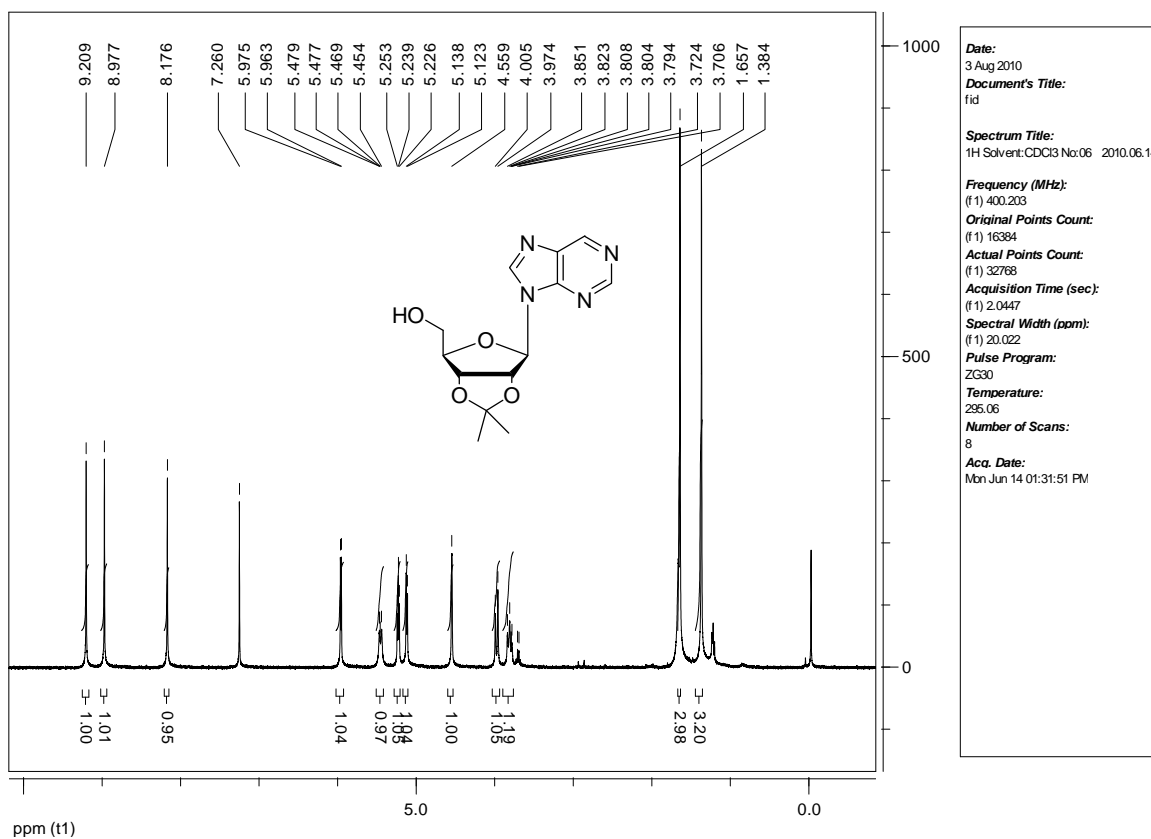

### <sup>13</sup>C NMR Spectrum for 2d

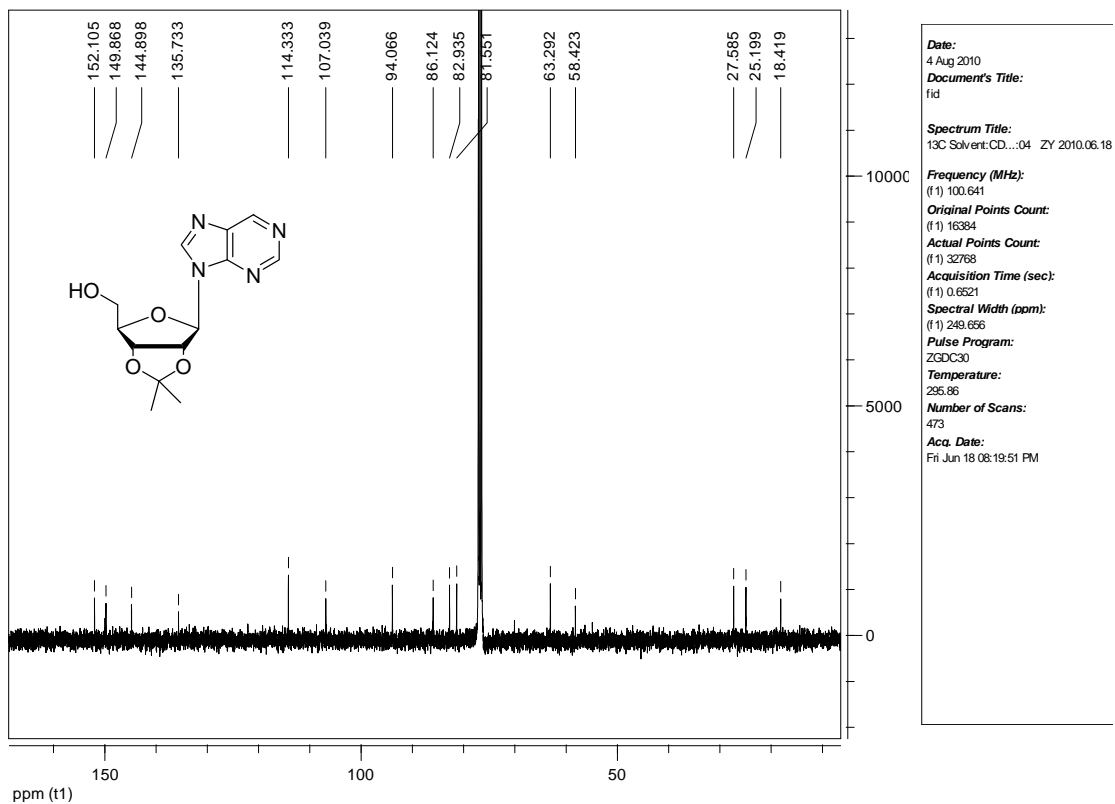

### <sup>1</sup>H NMR Spectrum for 2e

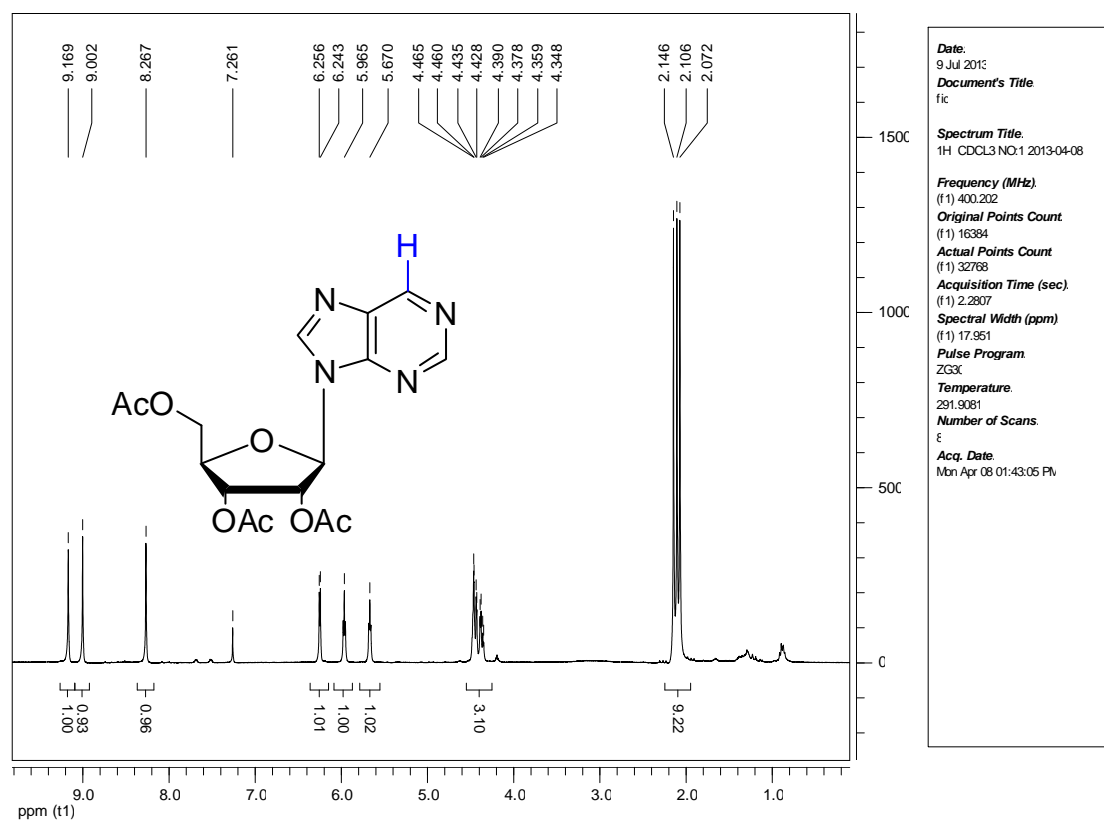

### <sup>13</sup>C NMR Spectrum for 2e

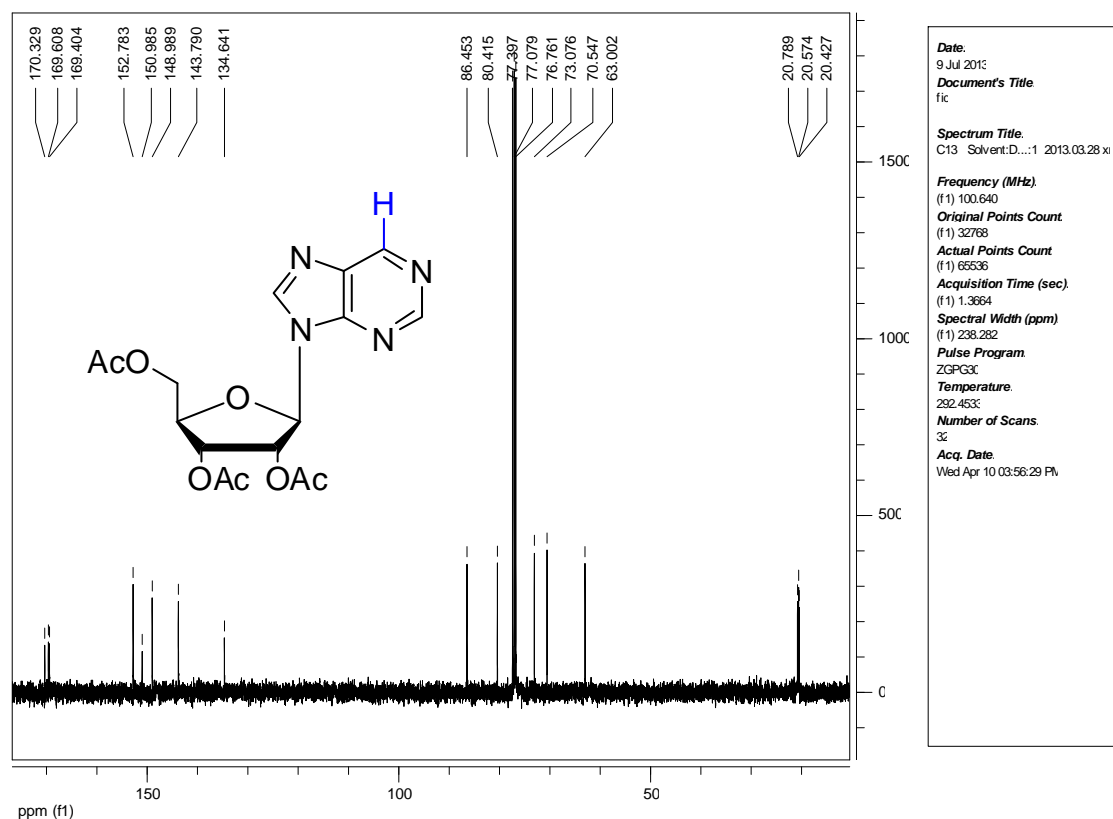

### <sup>1</sup>H NMR Spectrum for 2f

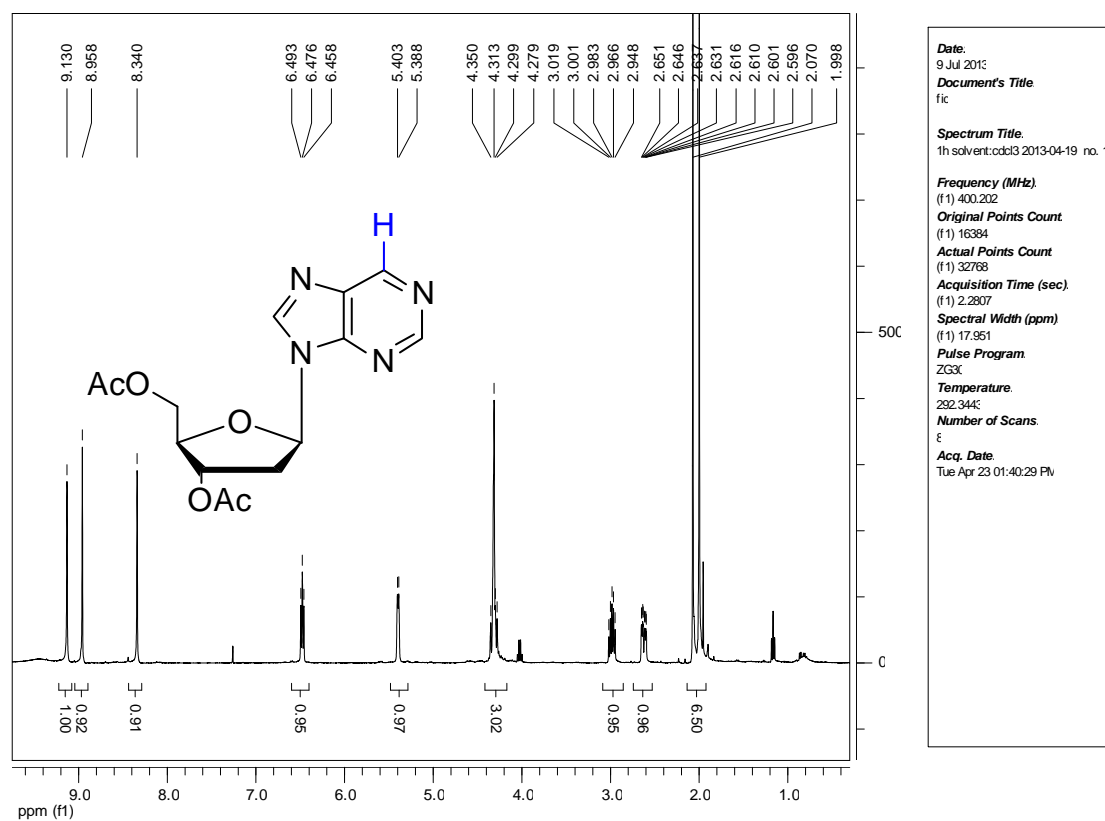

### <sup>13</sup>C NMR Spectrum for 2f

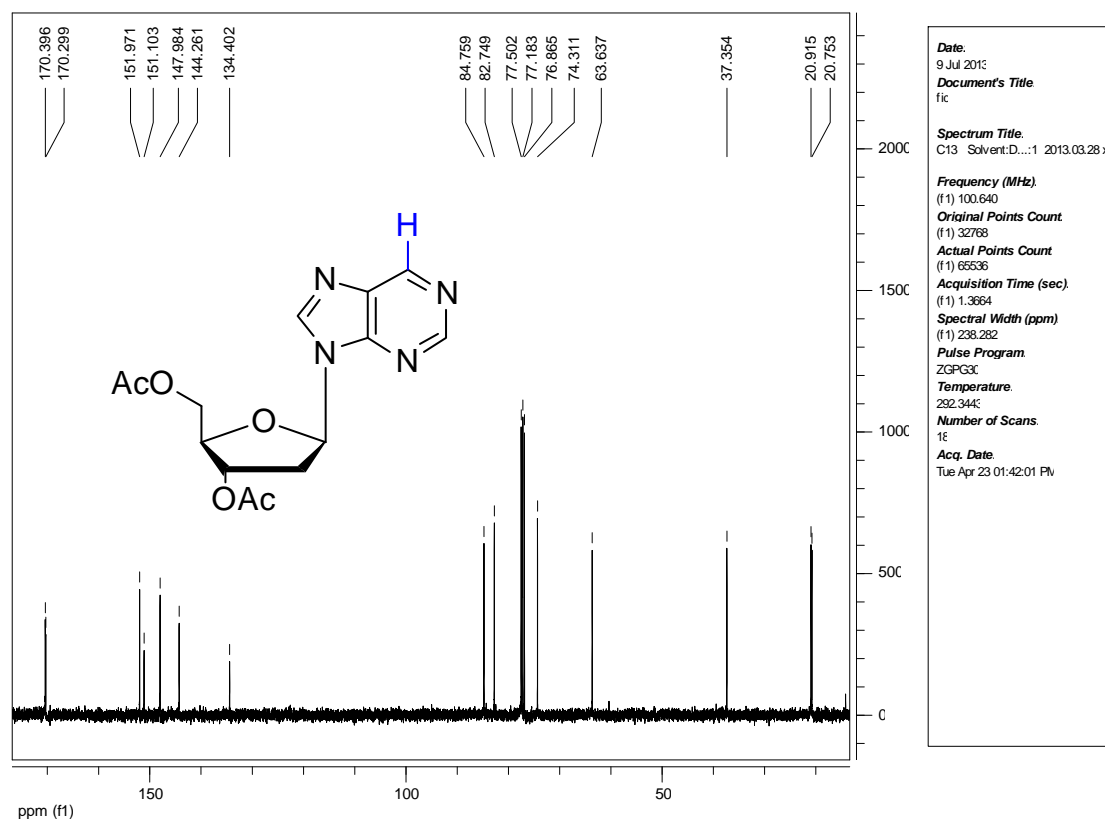

### <sup>1</sup>H NMR Spectrum for 2g

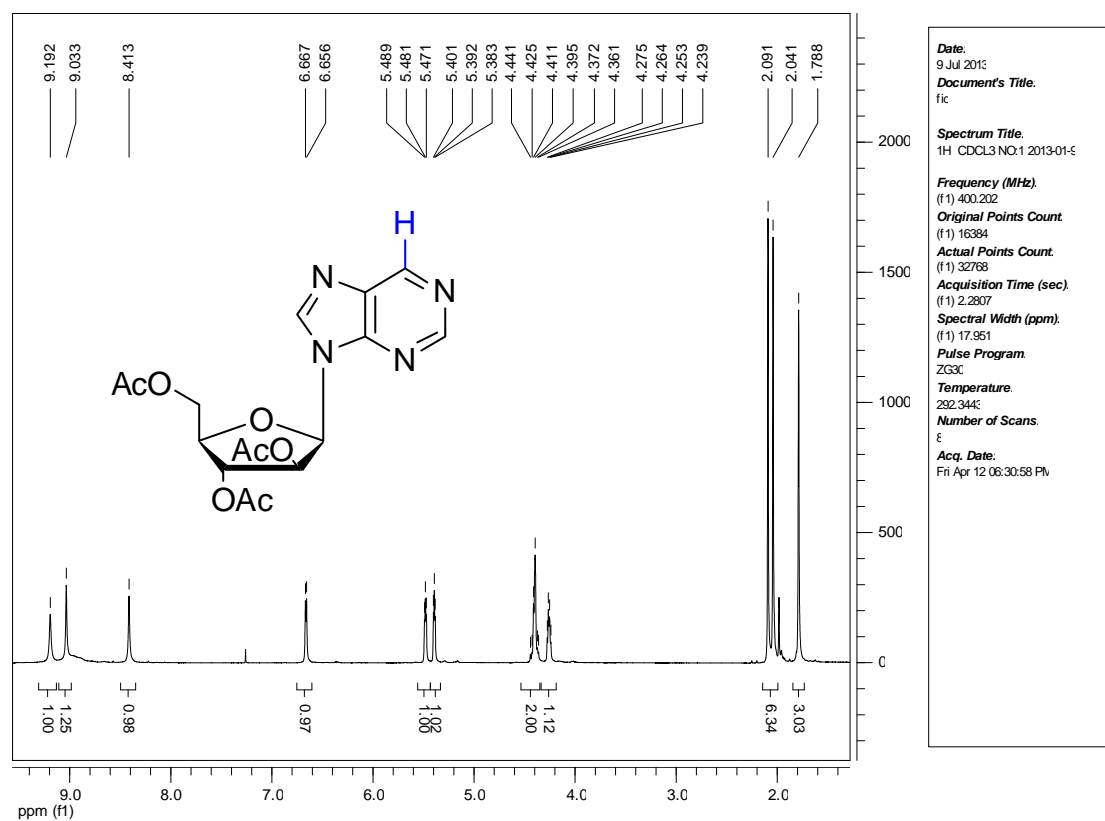

### <sup>13</sup>C NMR Spectrum for 2g

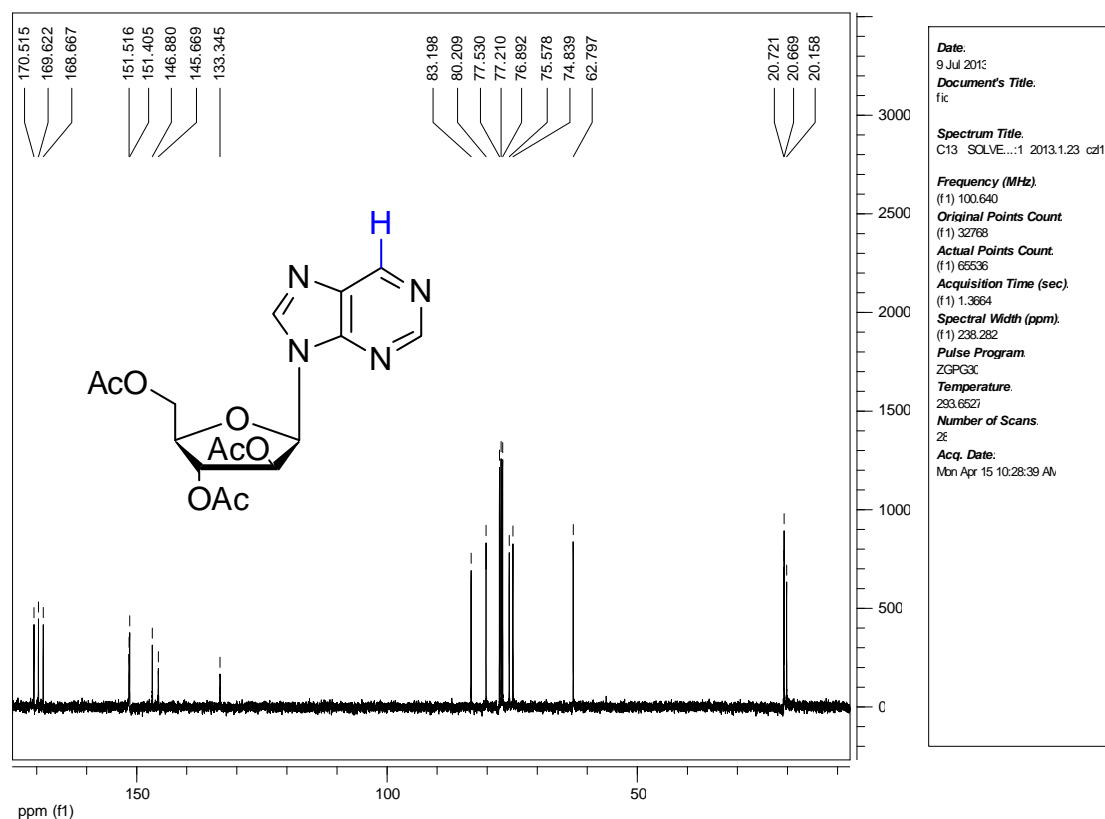

### <sup>1</sup>H NMR Spectrum for 2h

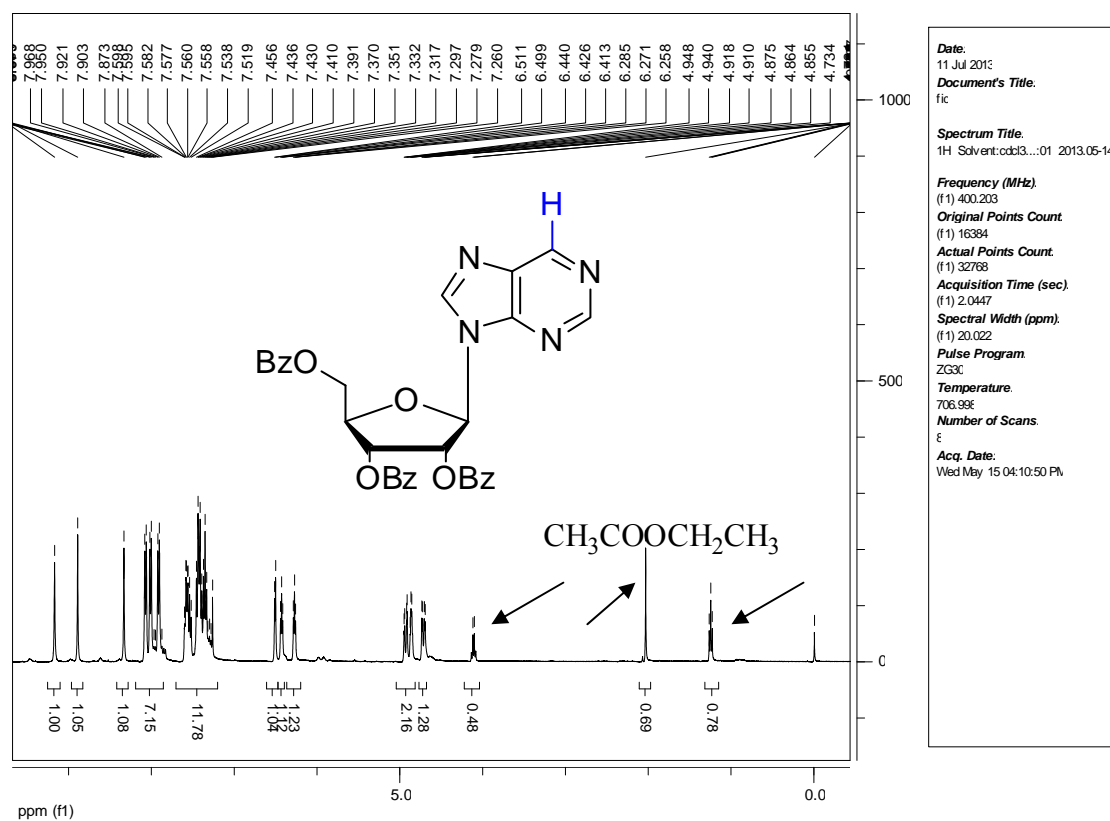

### <sup>13</sup>C NMR Spectrum for 2h

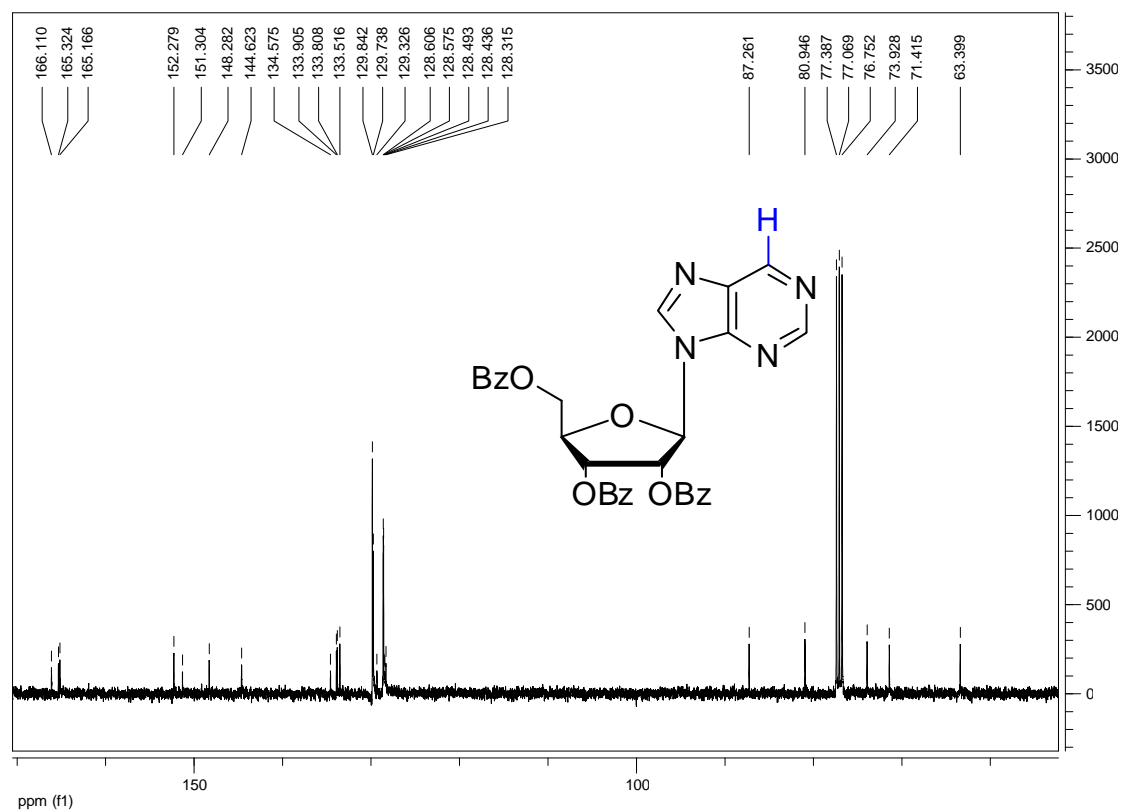

### <sup>1</sup>H NMR Spectrum for 2i



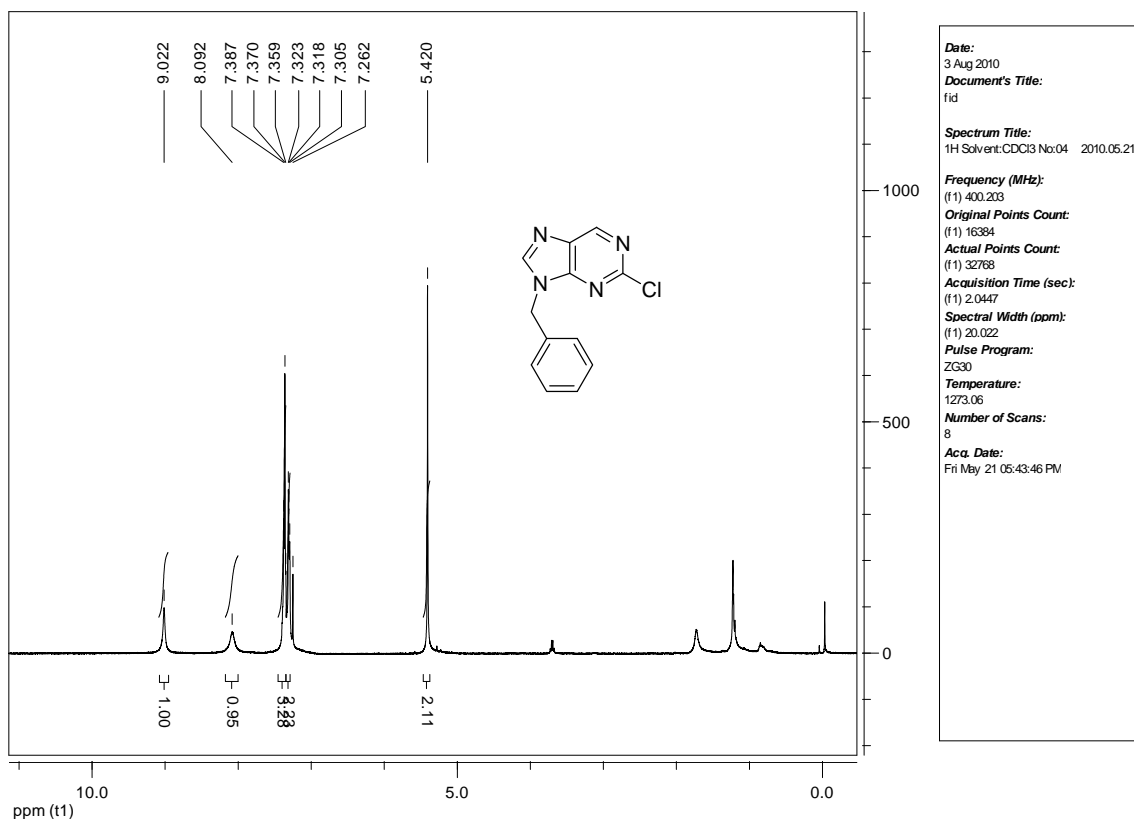

### <sup>13</sup>C NMR Spectrum for 2i

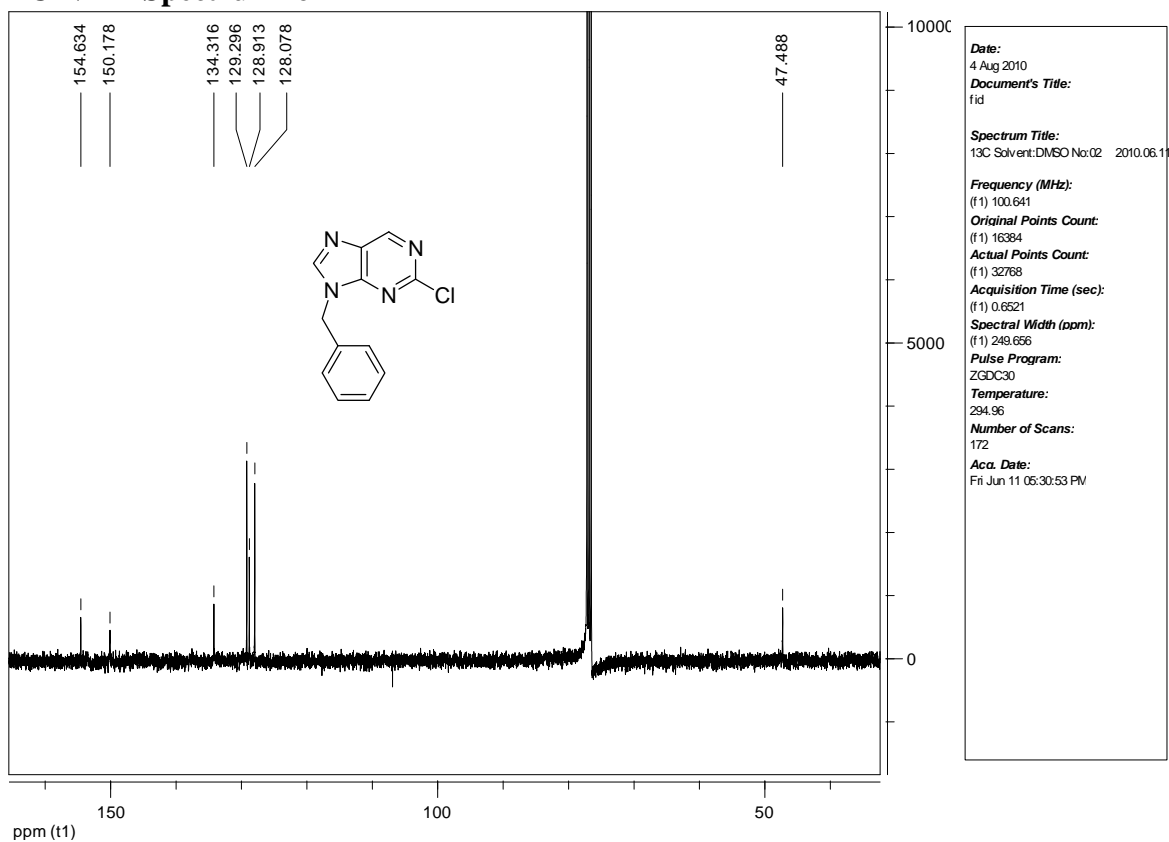

### <sup>1</sup>H NMR Spectrum for 2j

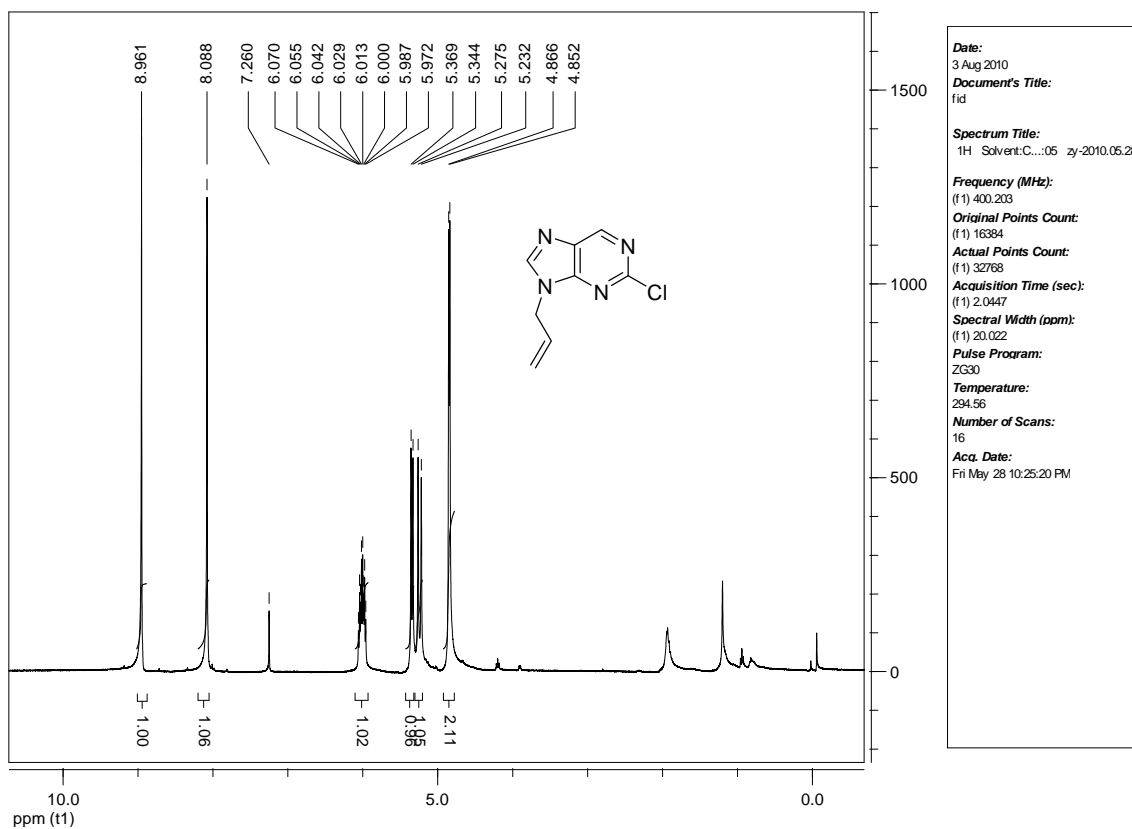

### <sup>13</sup>C NMR Spectrum for 2j

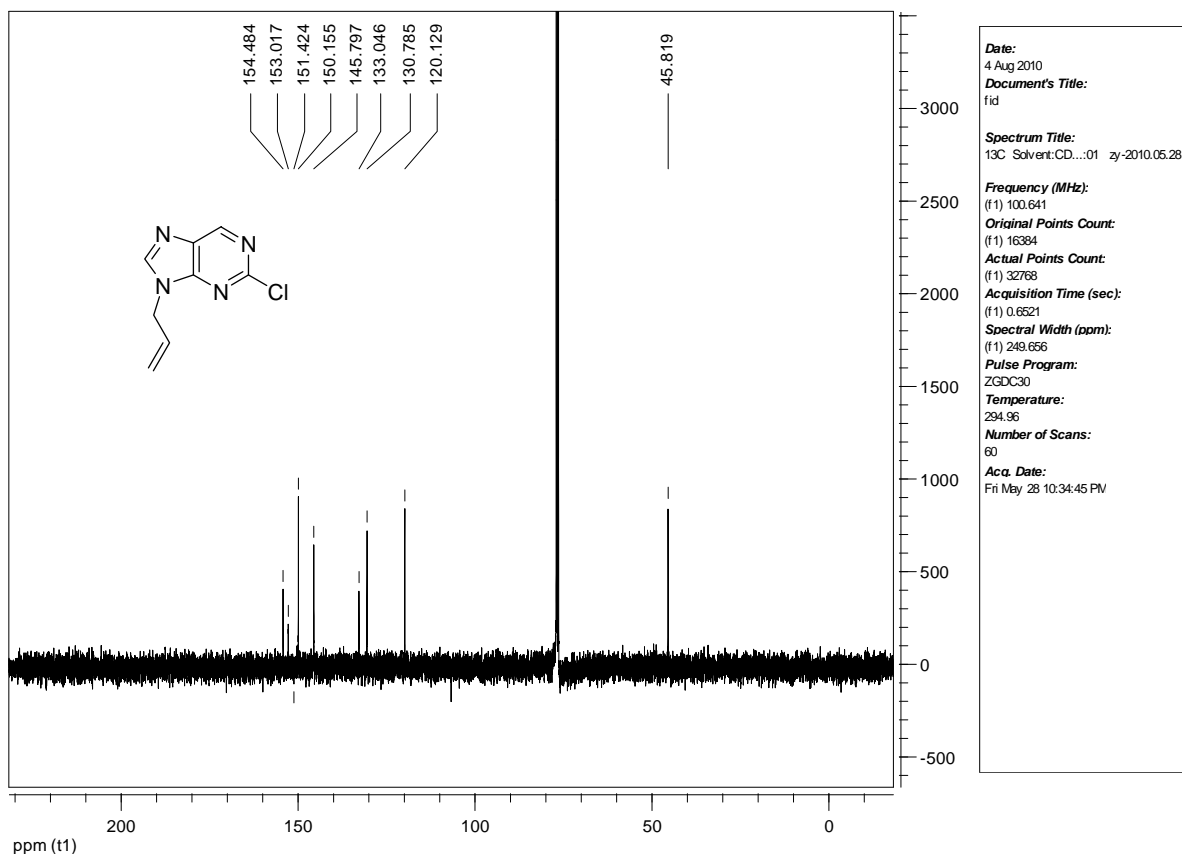

### <sup>1</sup>H NMR Spectrum for 2k

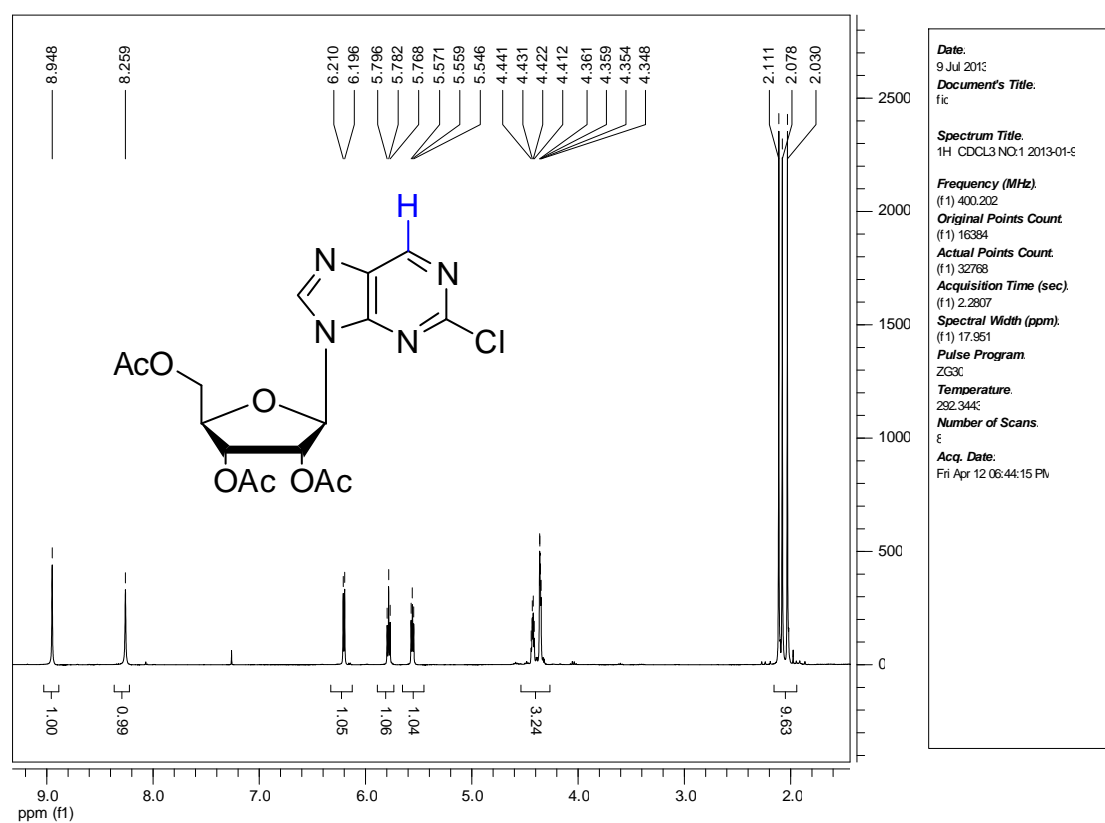

### <sup>13</sup>C NMR Spectrum for 2k

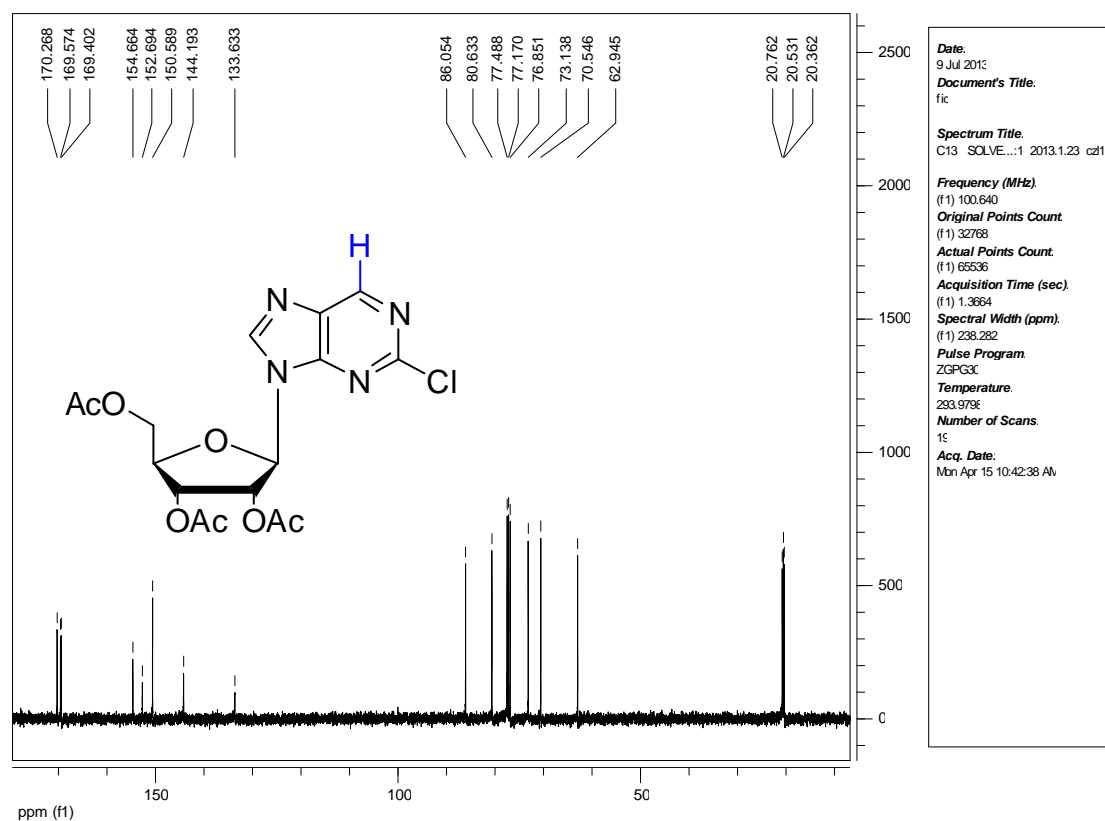

### <sup>1</sup>H NMR Spectrum for 2l

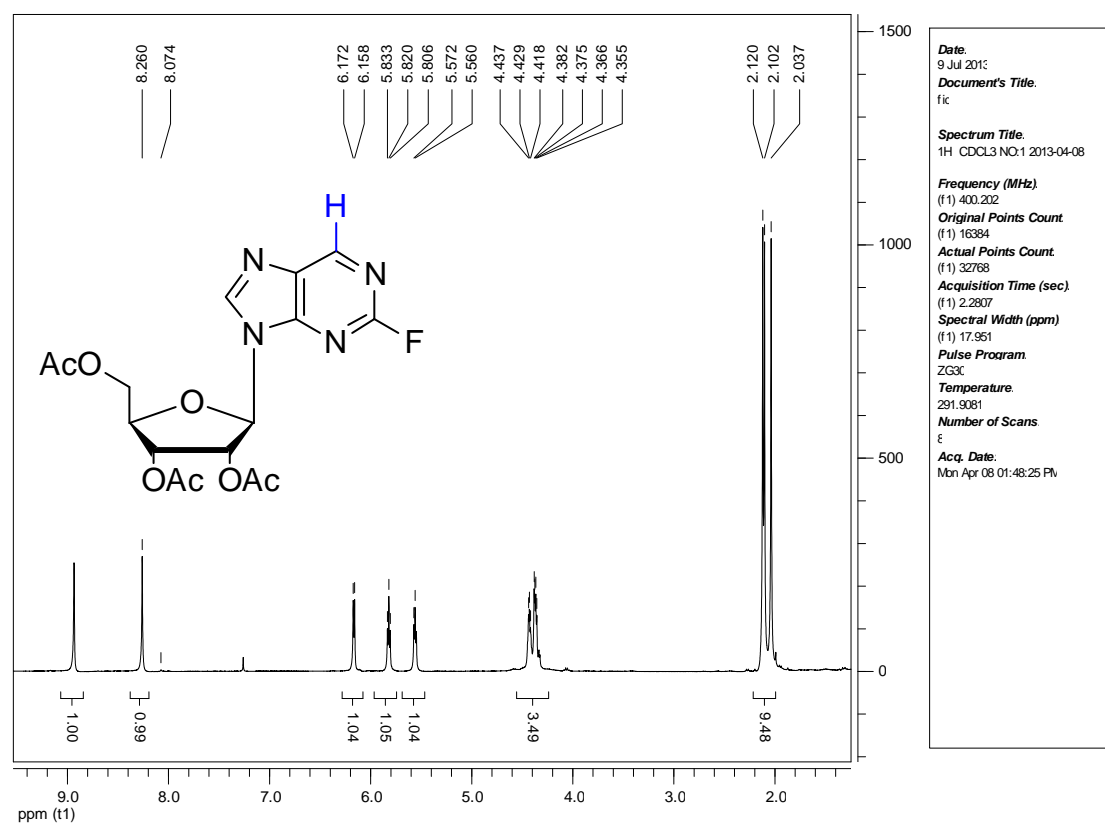

### <sup>13</sup>C NMR Spectrum for 2l

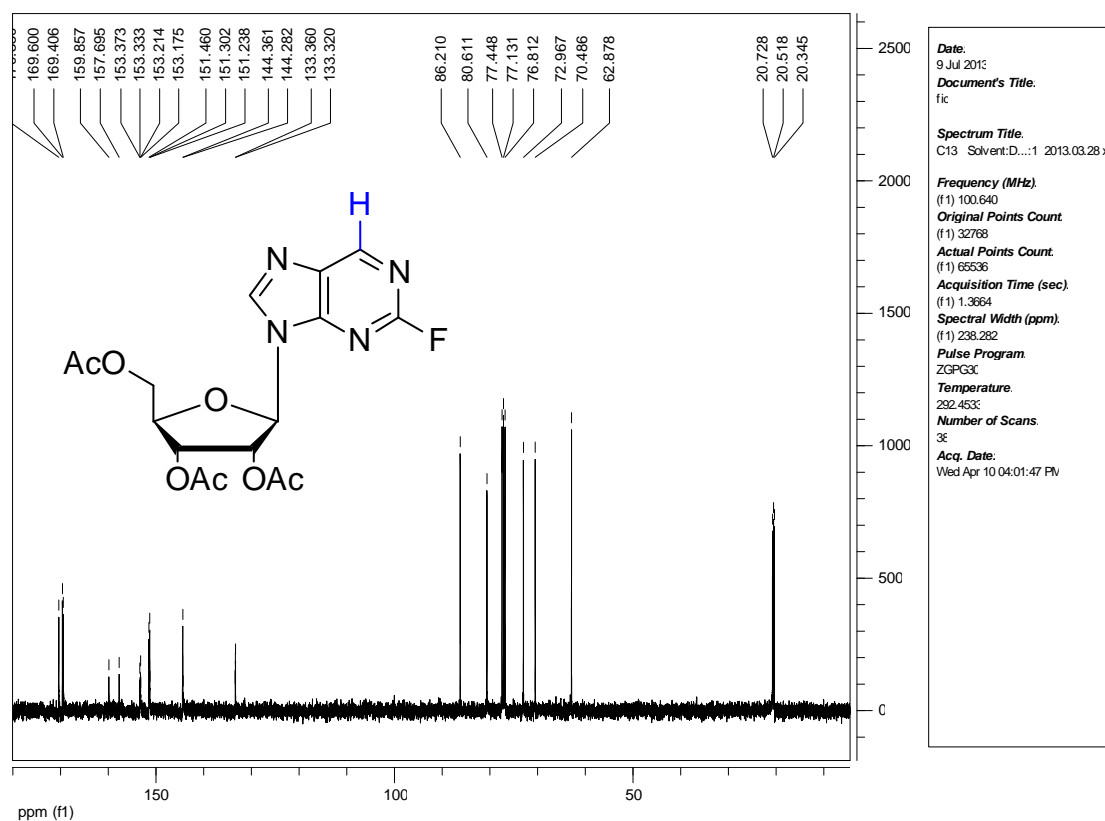

### <sup>1</sup>H NMR Spectrum for 2m

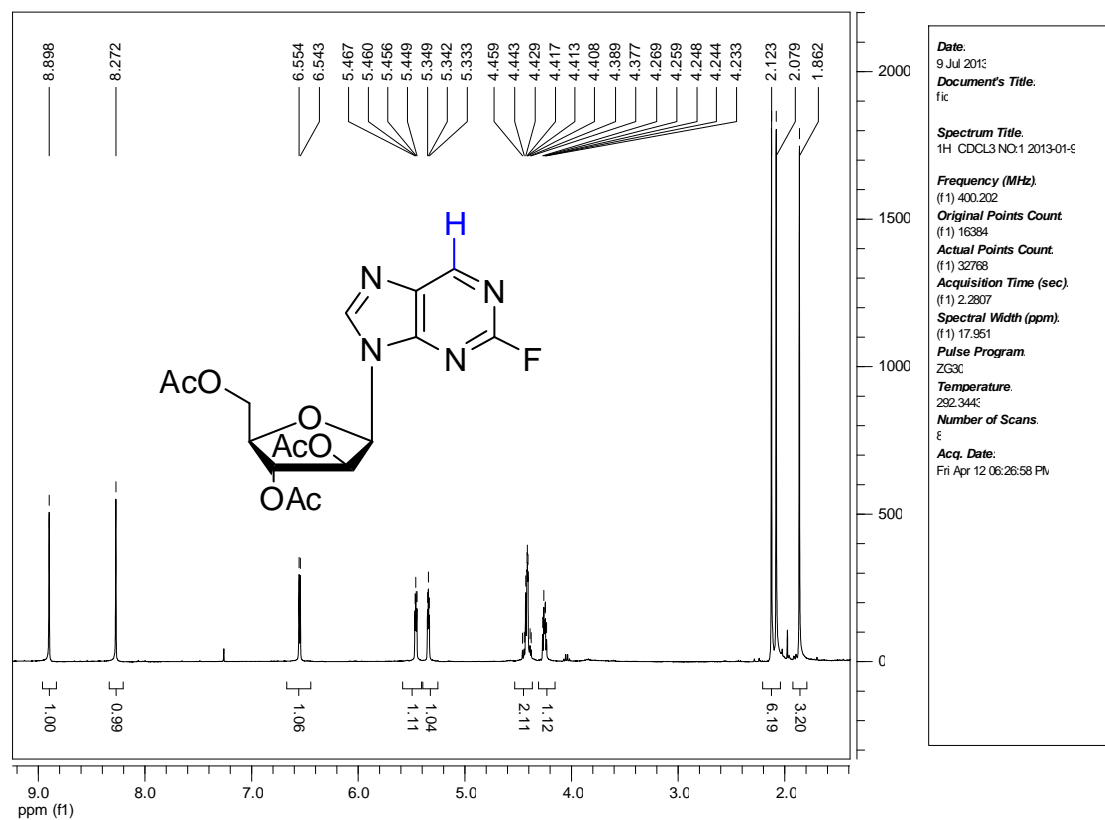

### <sup>13</sup>C NMR Spectrum for 2m

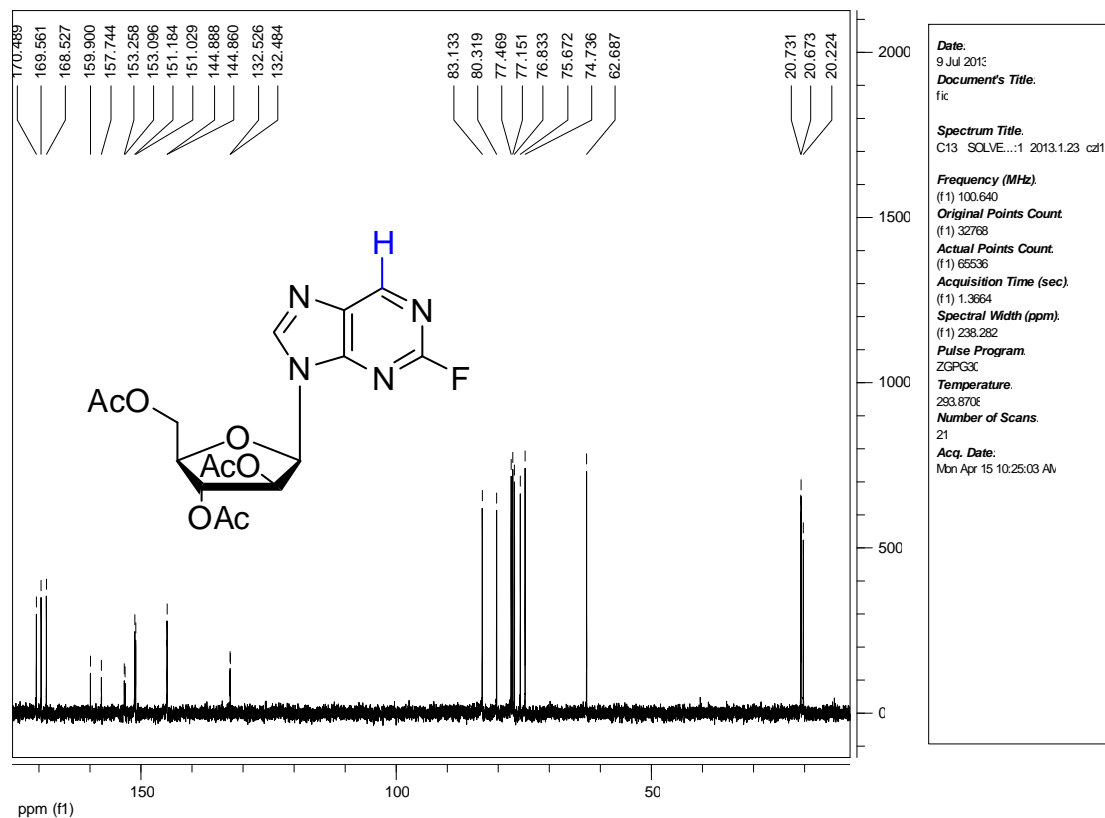

### <sup>1</sup>H NMR Spectrum for 2n

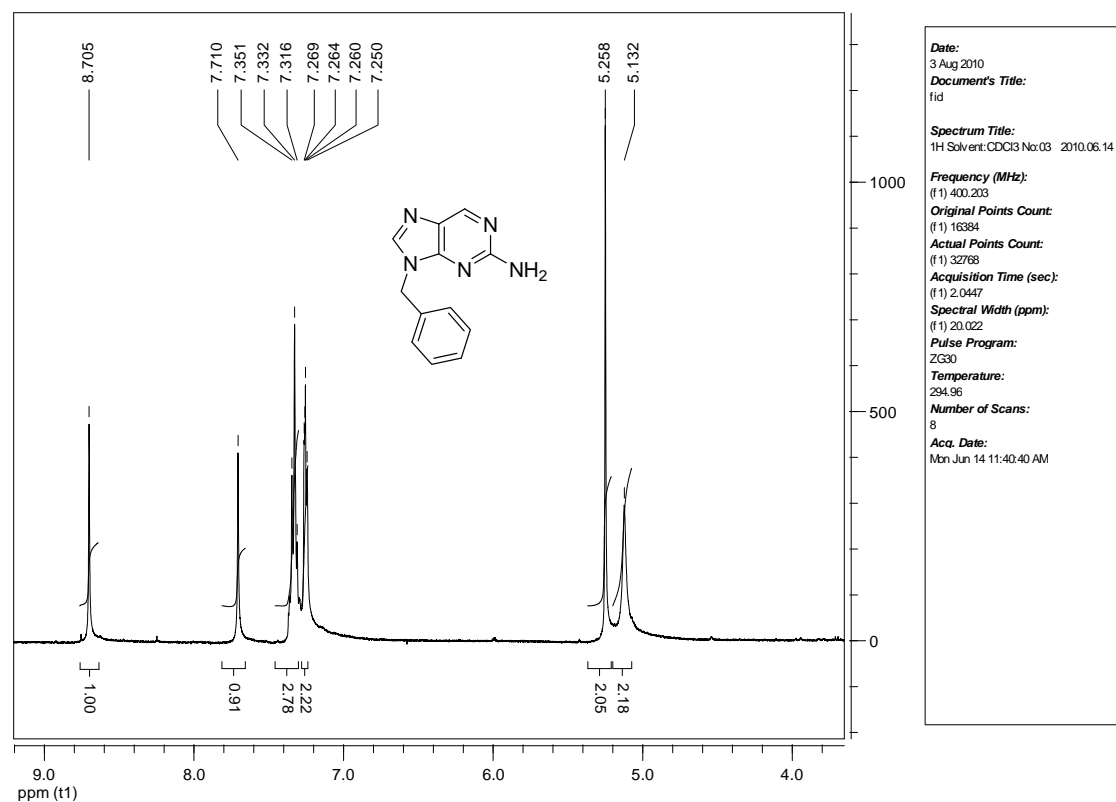

### <sup>13</sup>C NMR Spectrum for 2n

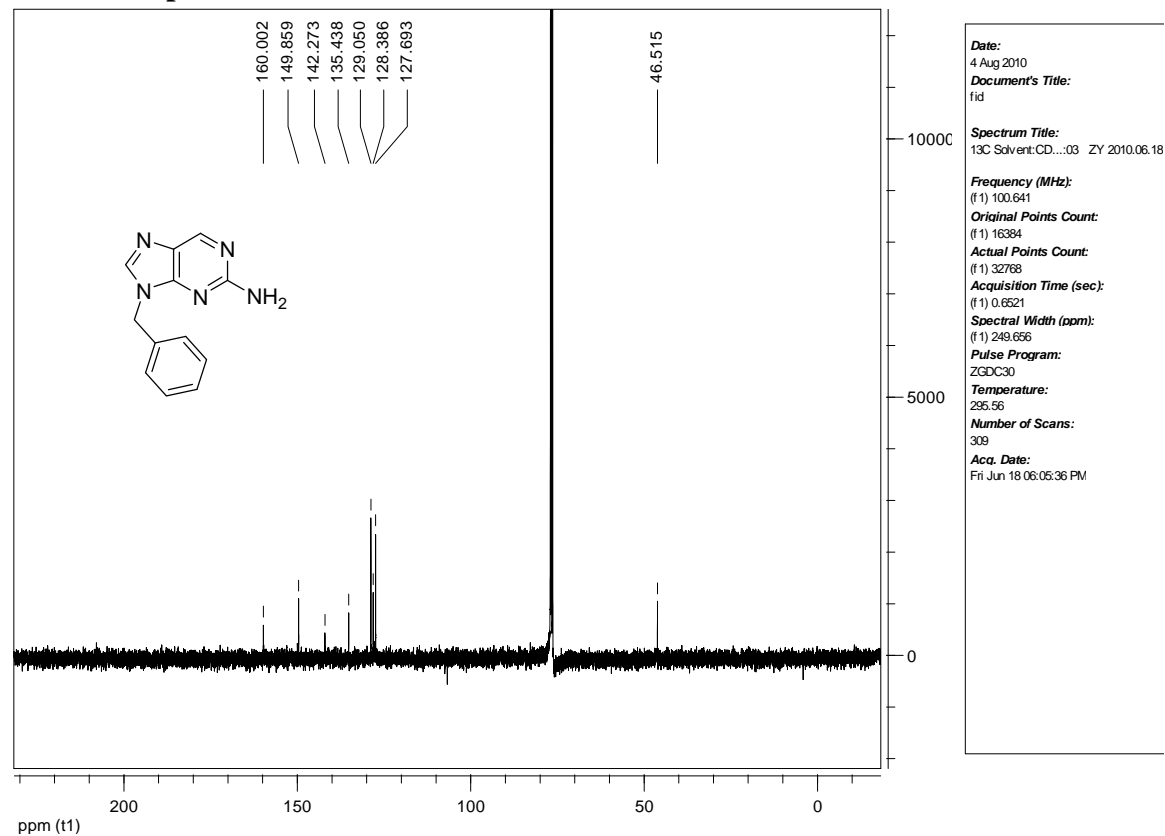

### <sup>1</sup>H NMR Spectrum for 2o

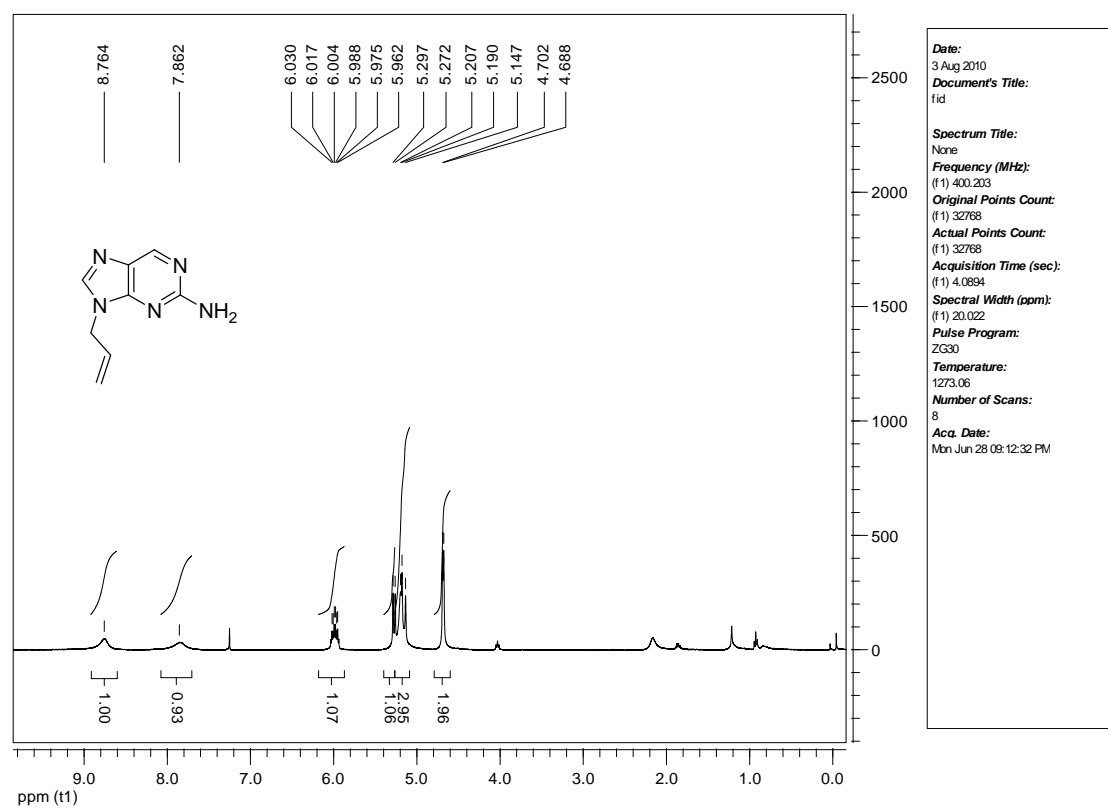

### <sup>13</sup>C NMR Spectrum for 2o

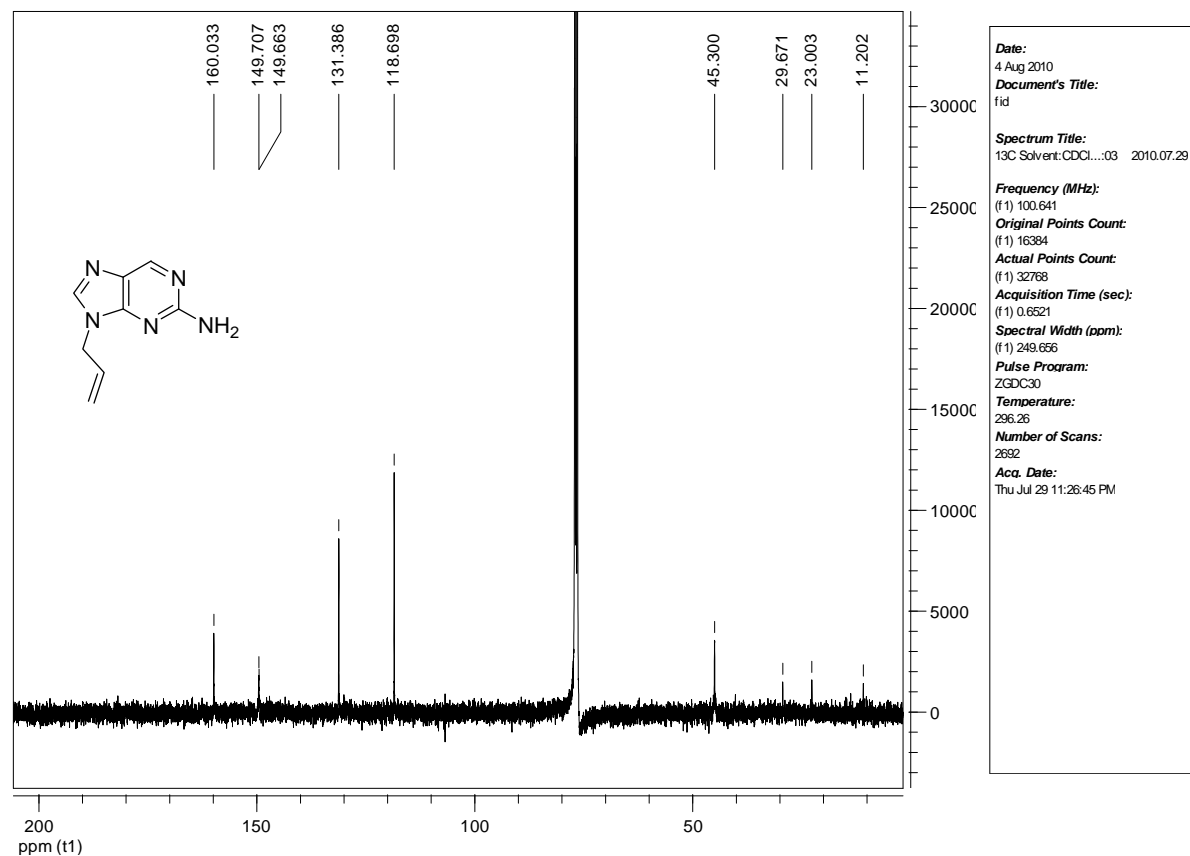



### <sup>1</sup>H NMR Spectrum for 2p

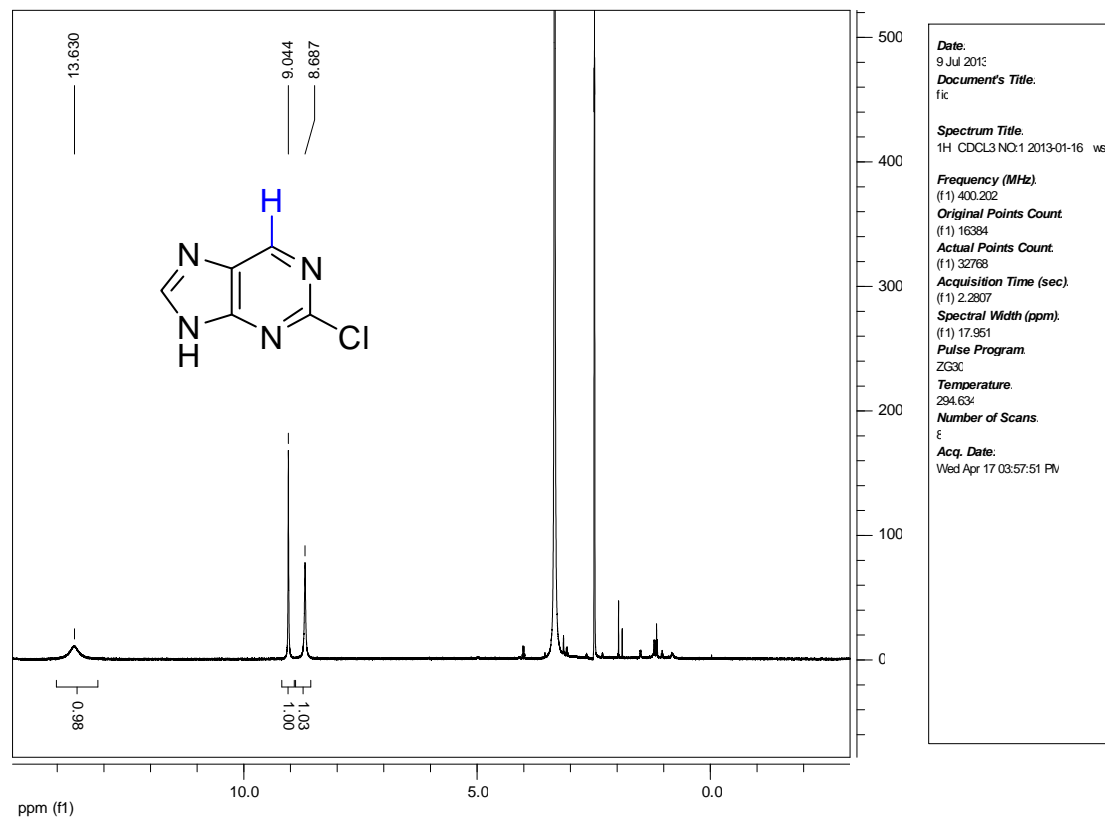

### <sup>13</sup>C NMR Spectrum for 2p

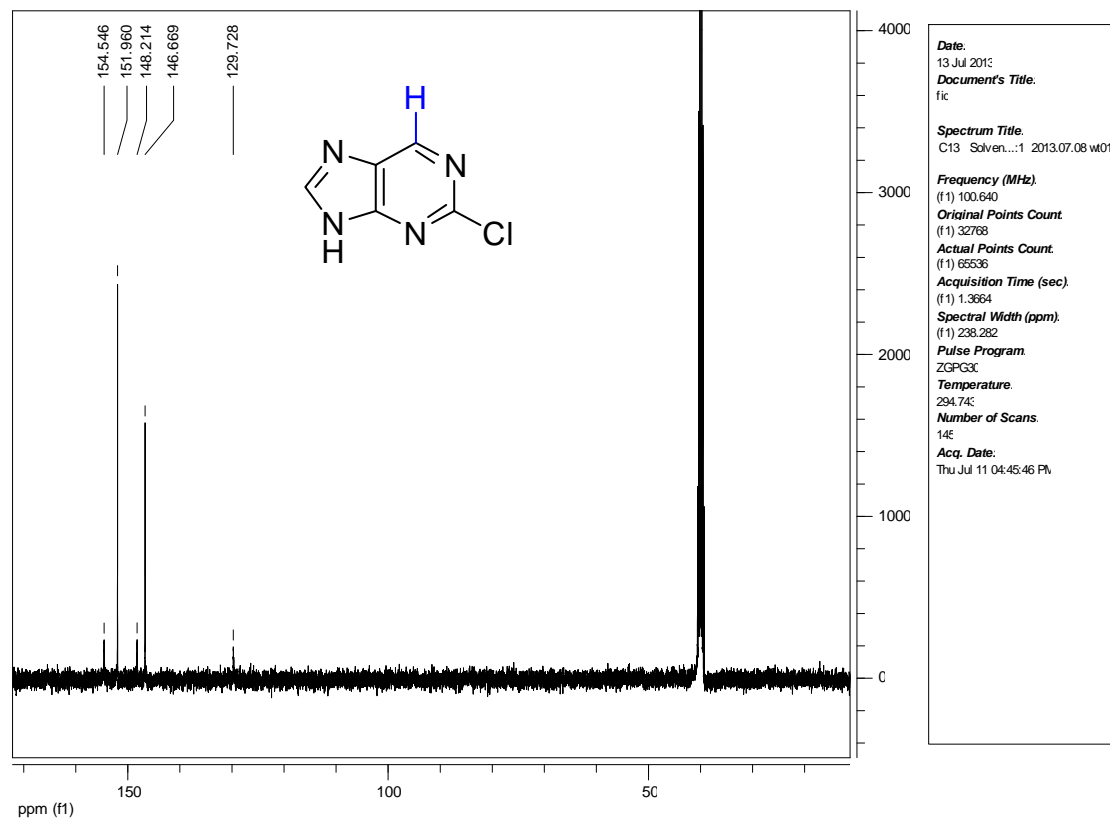

### <sup>1</sup>H NMR Spectrum for 4a, 4b

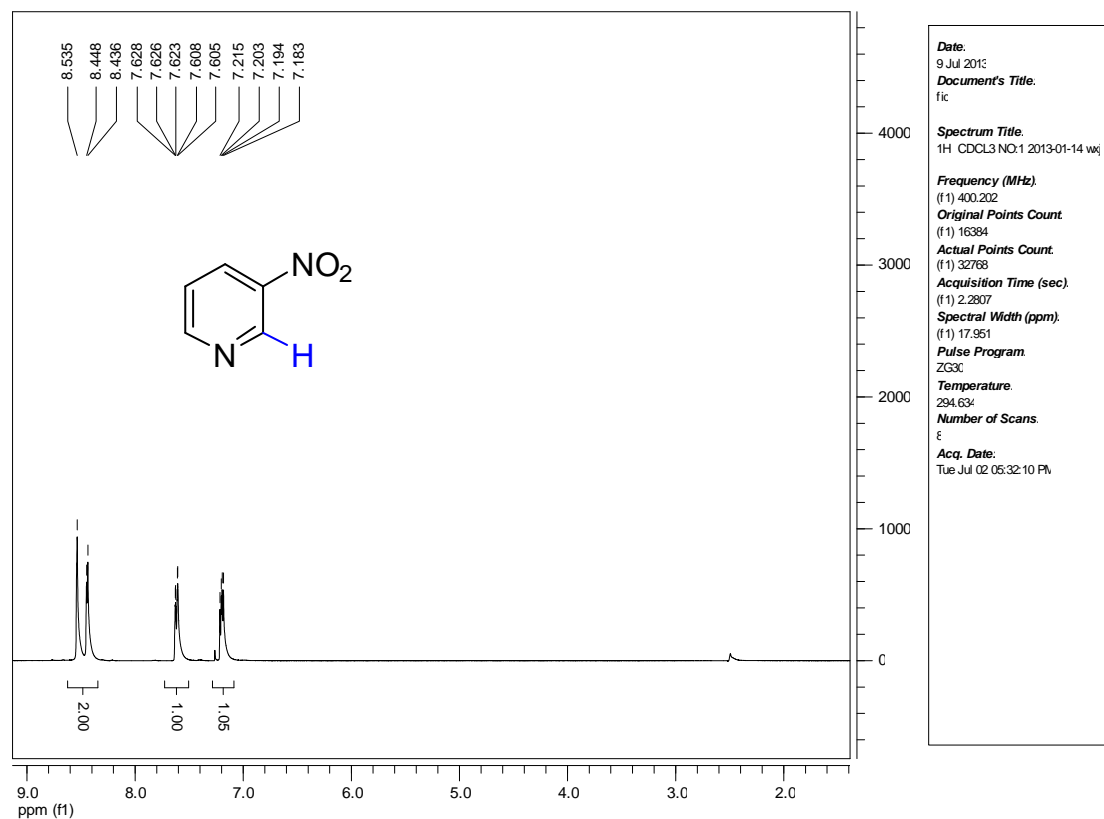

### <sup>13</sup>C NMR Spectrum for 4a, 4b

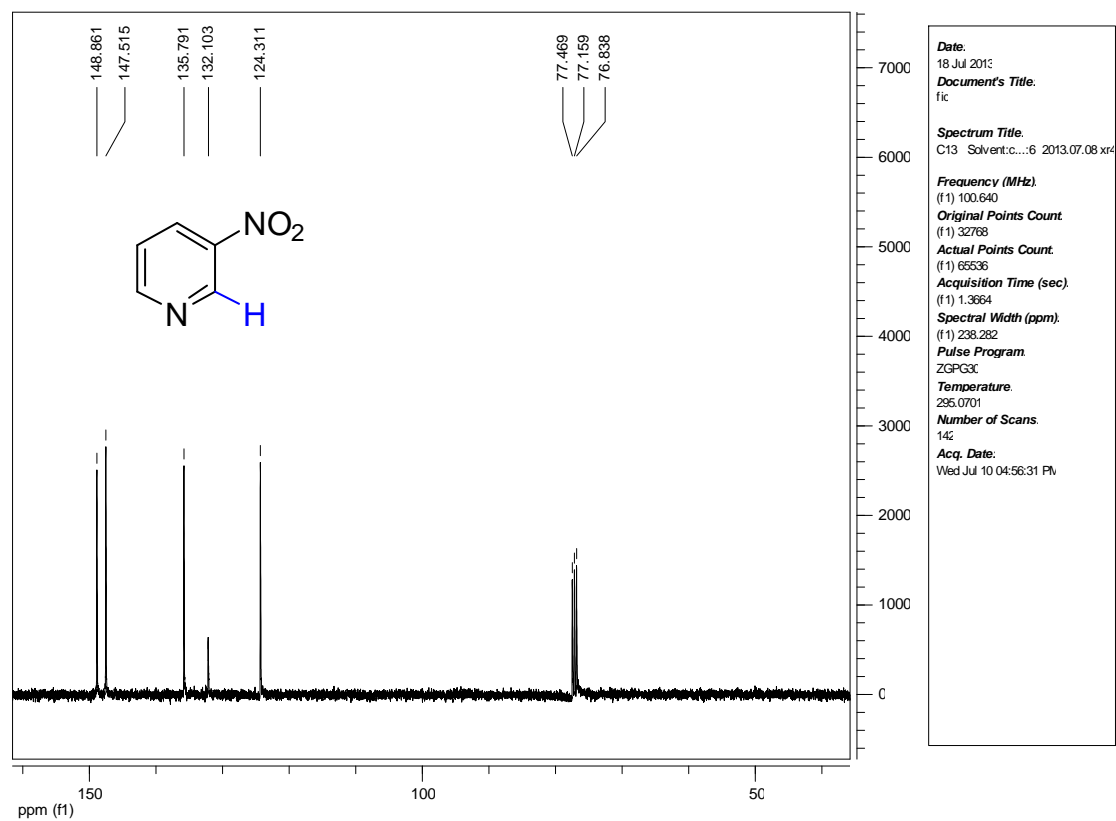

### <sup>1</sup>H NMR Spectrum for 4c

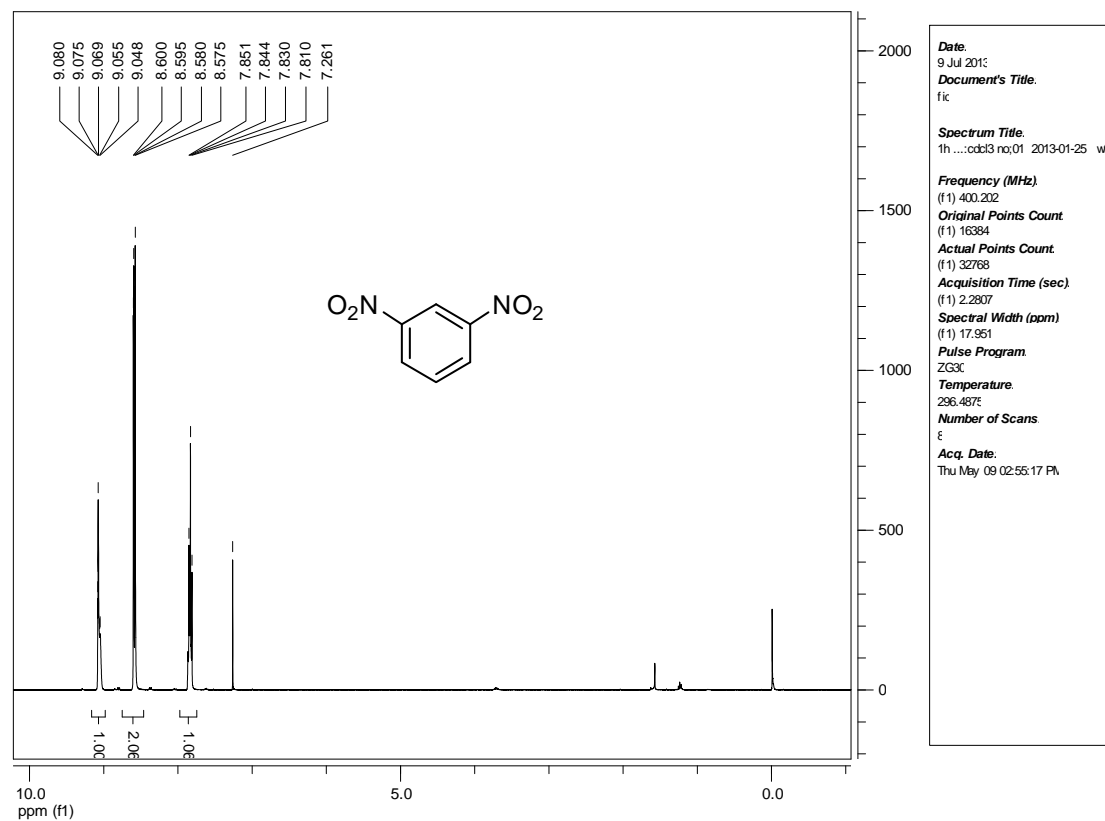

### <sup>13</sup>C NMR Spectrum for 4c

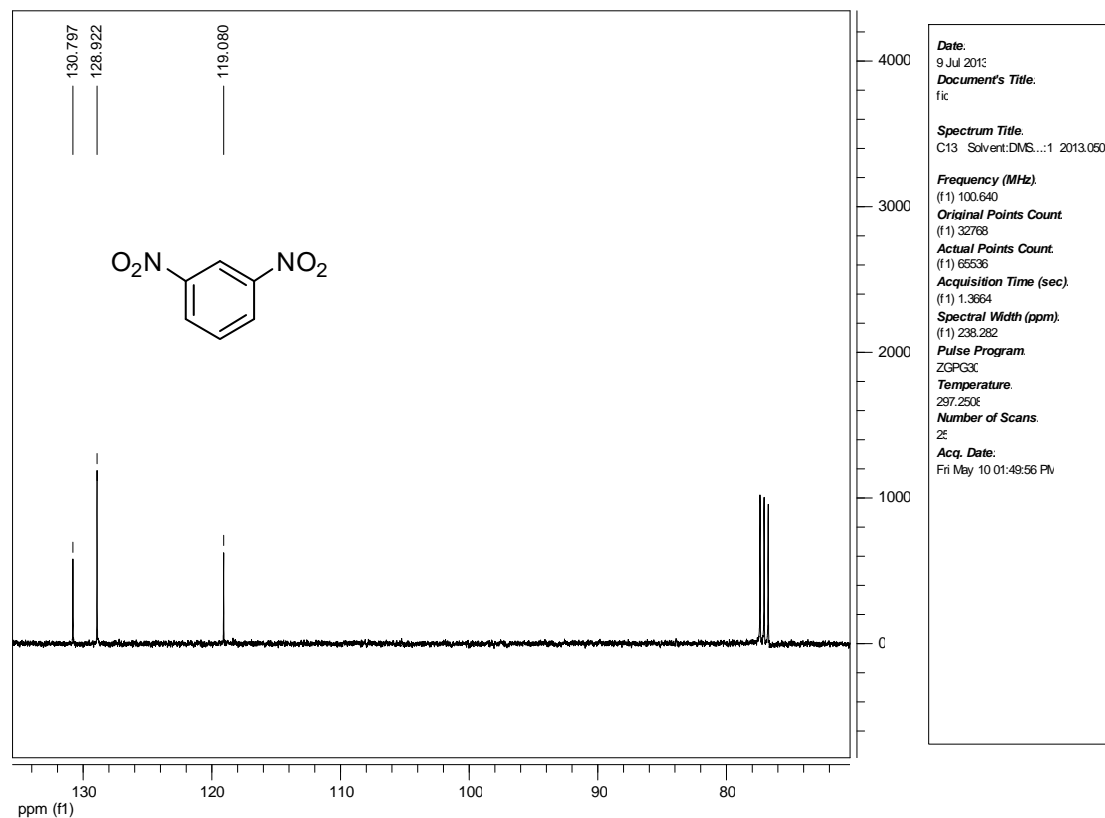

### <sup>1</sup>H NMR Spectrum for 4d

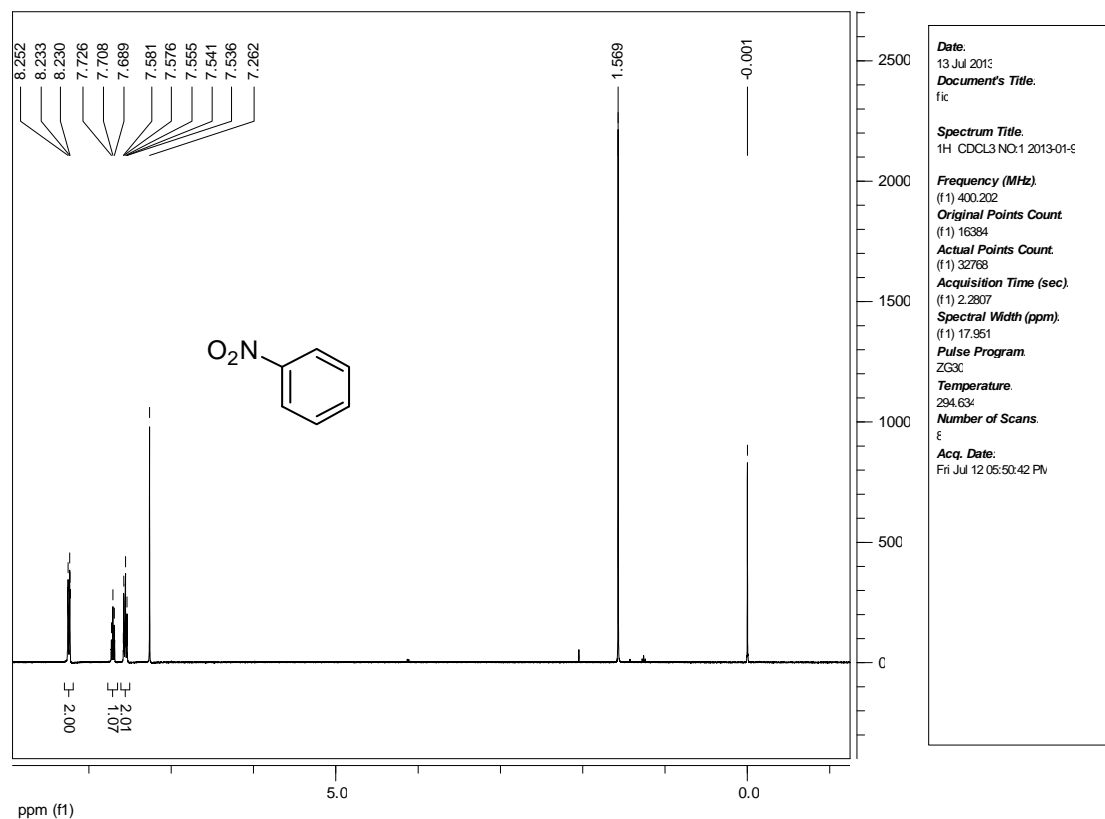

### <sup>13</sup>C NMR Spectrum for 4d

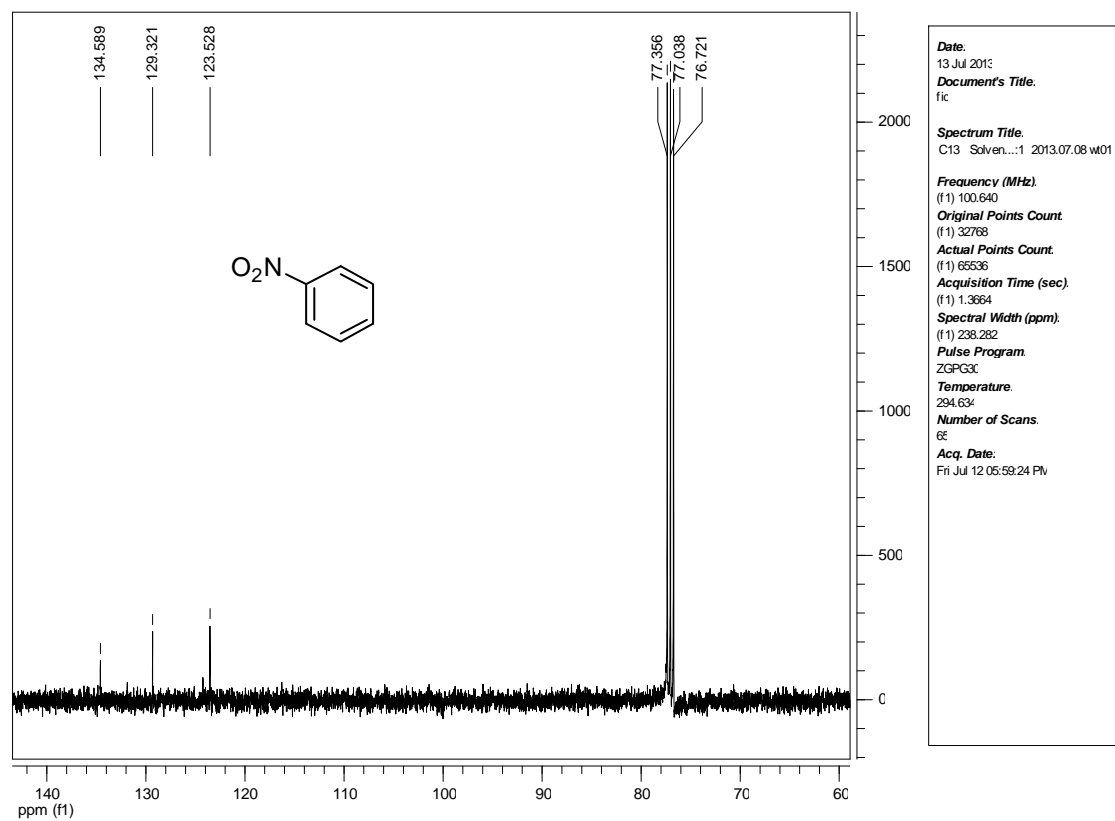

### <sup>1</sup>H NMR Spectrum for 4f

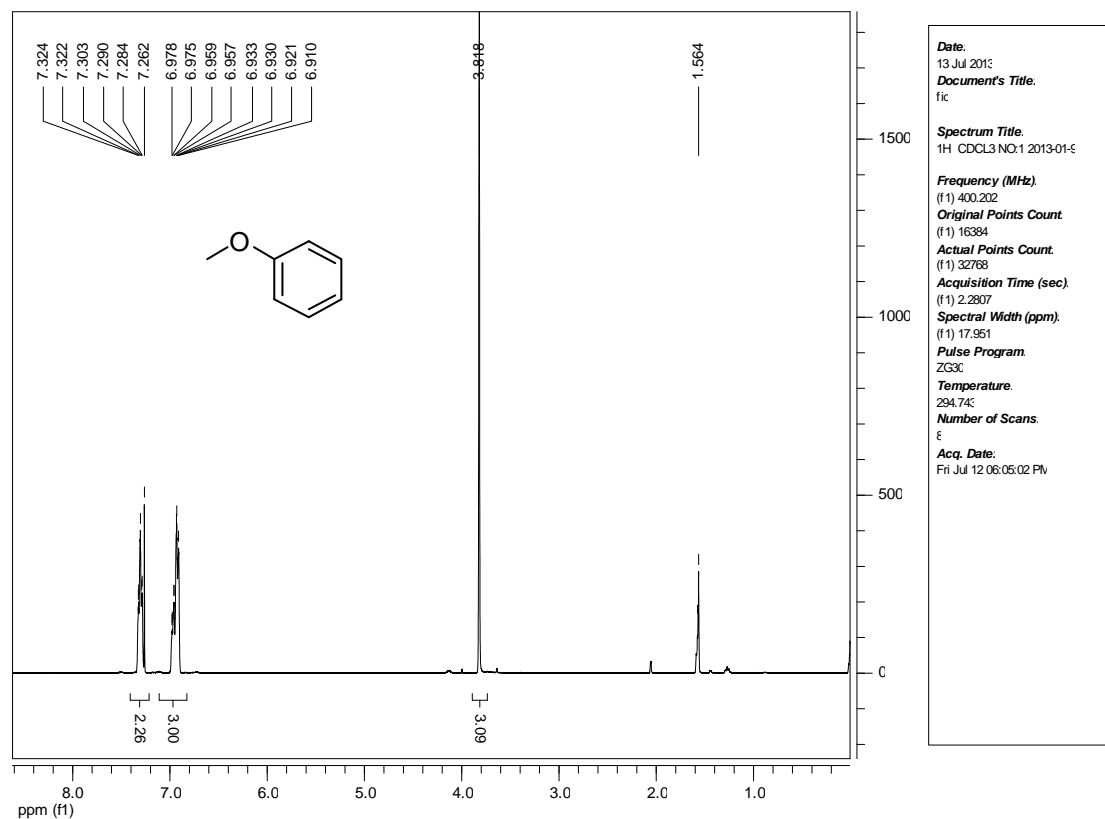

### <sup>13</sup>C NMR Spectrum for 4f

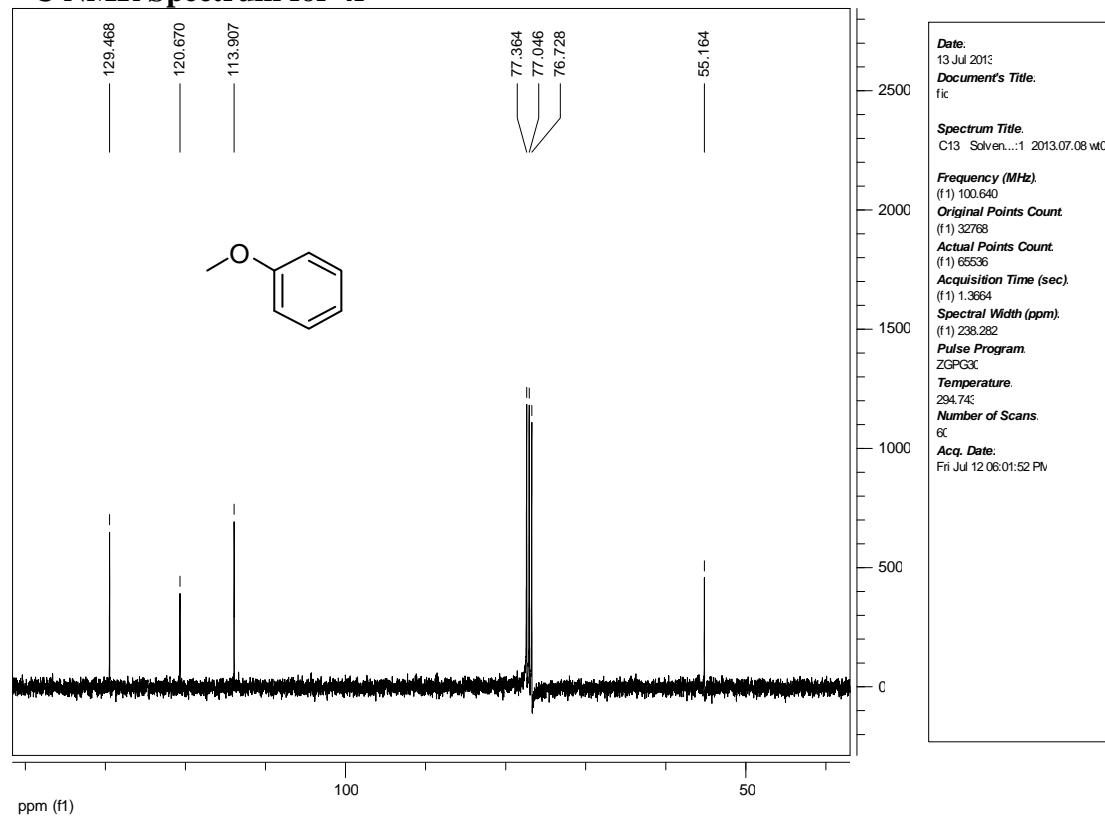

### <sup>1</sup>H NMR Spectrum for 4g

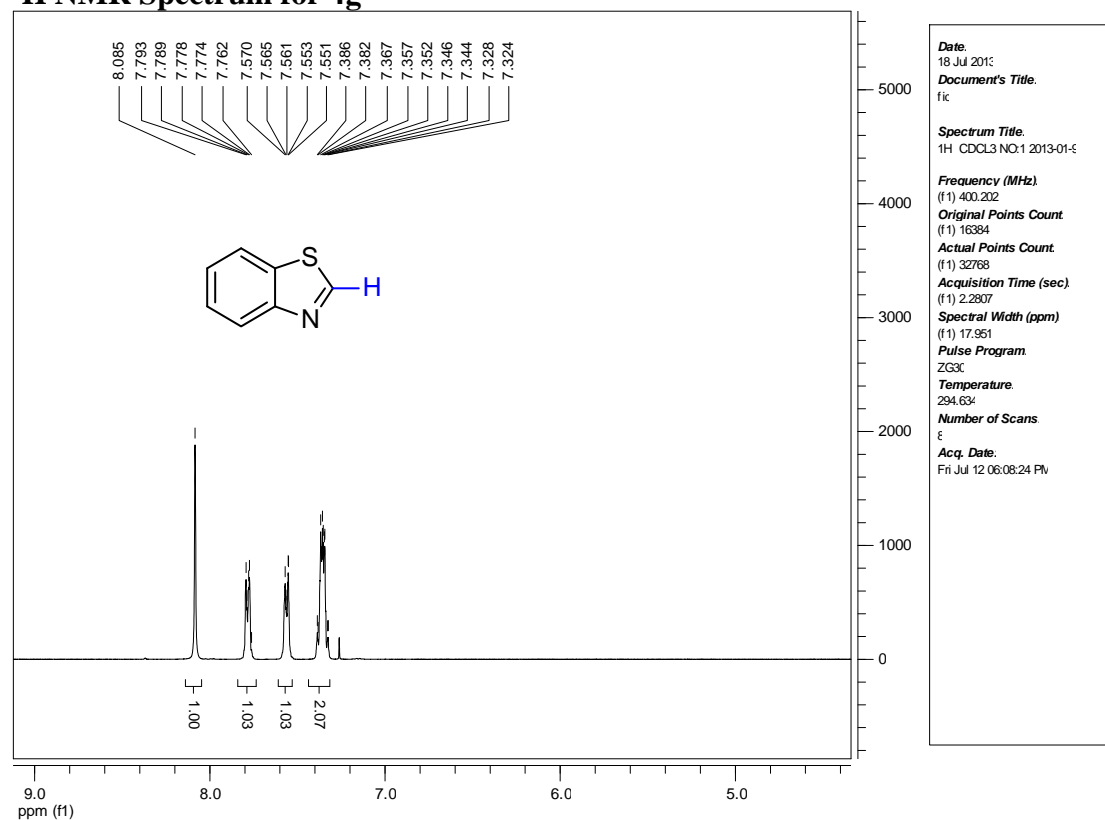

### <sup>13</sup>C NMR Spectrum for 4g

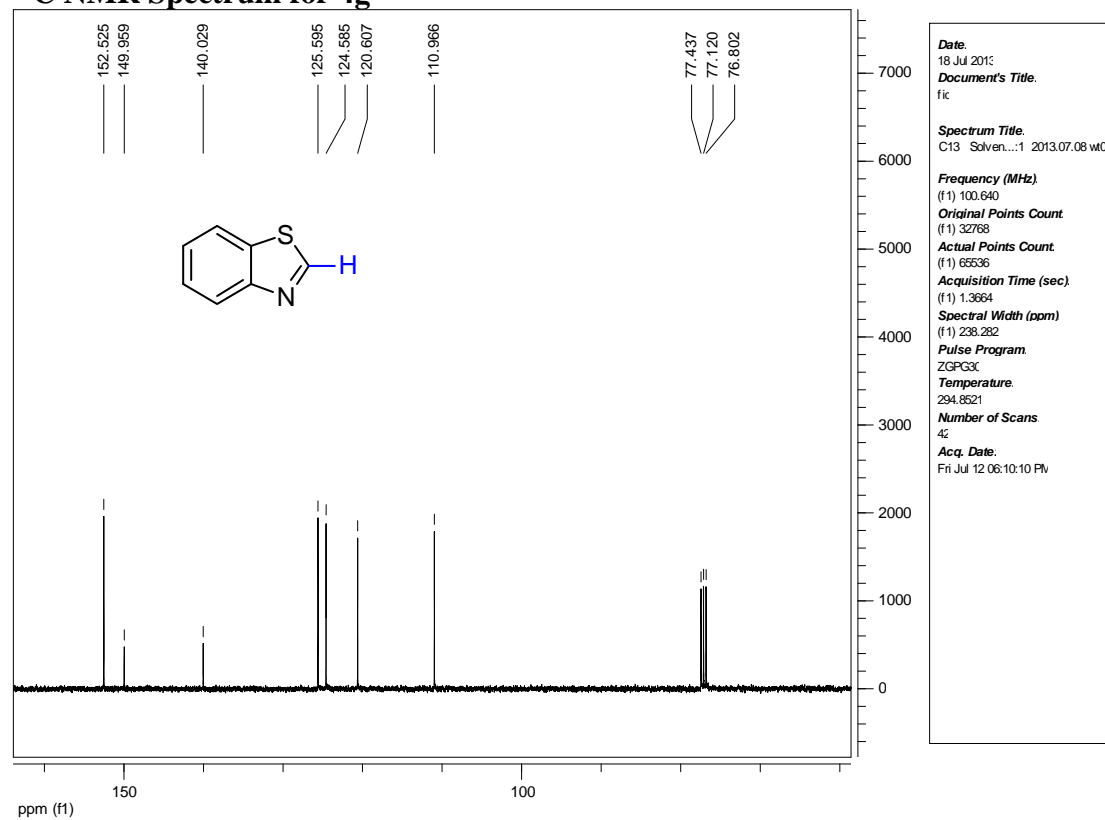

### <sup>1</sup>H NMR Spectrum for 4h

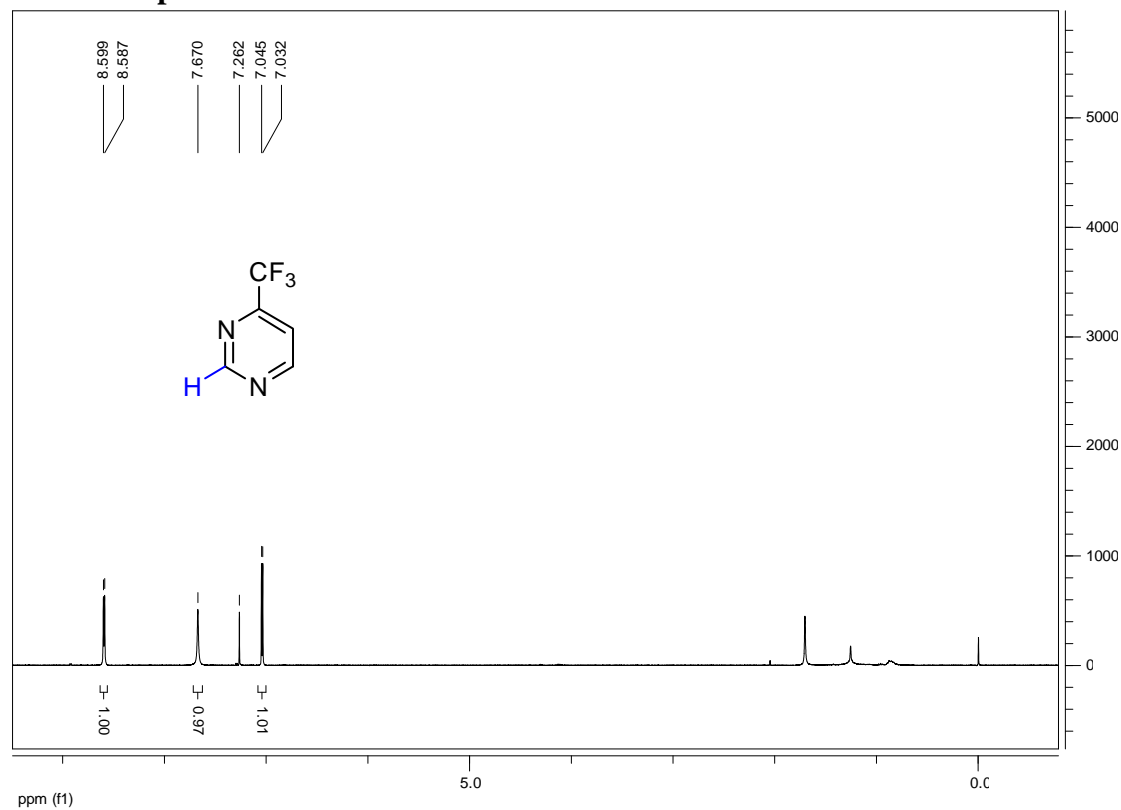

### <sup>13</sup>C NMR Spectrum for 4h

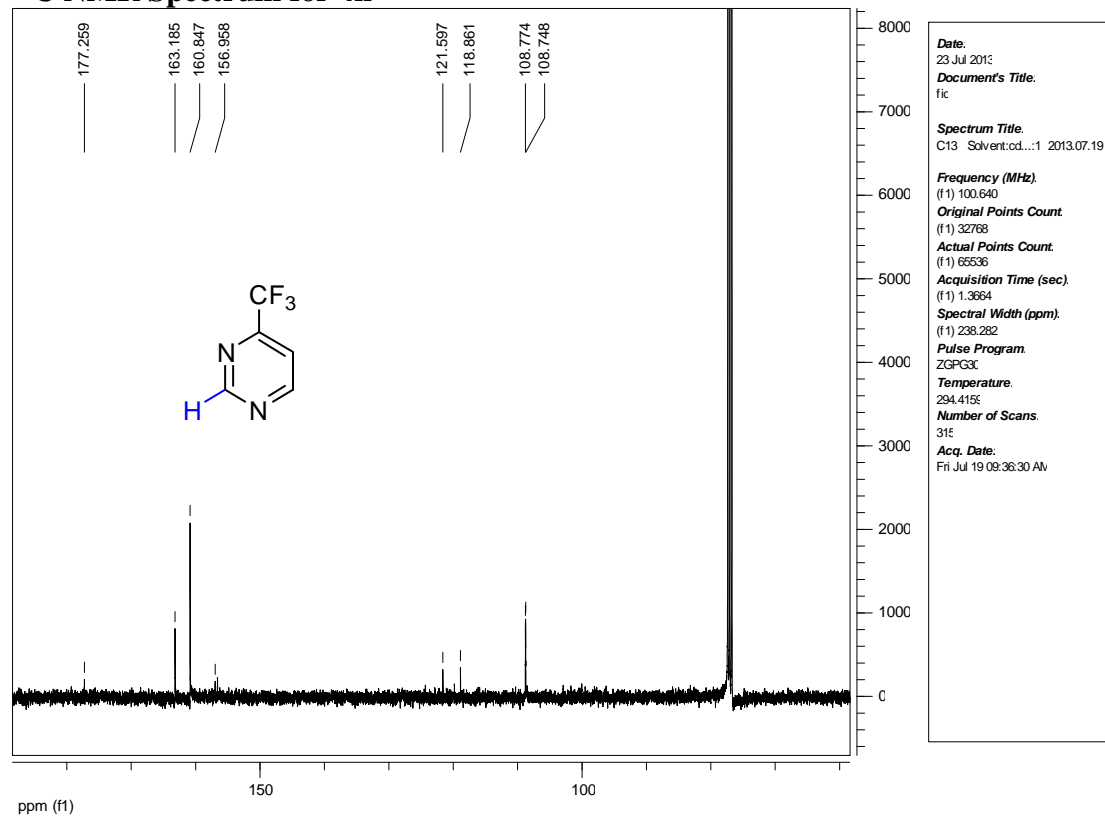

### <sup>1</sup>H NMR Spectrum for 4i

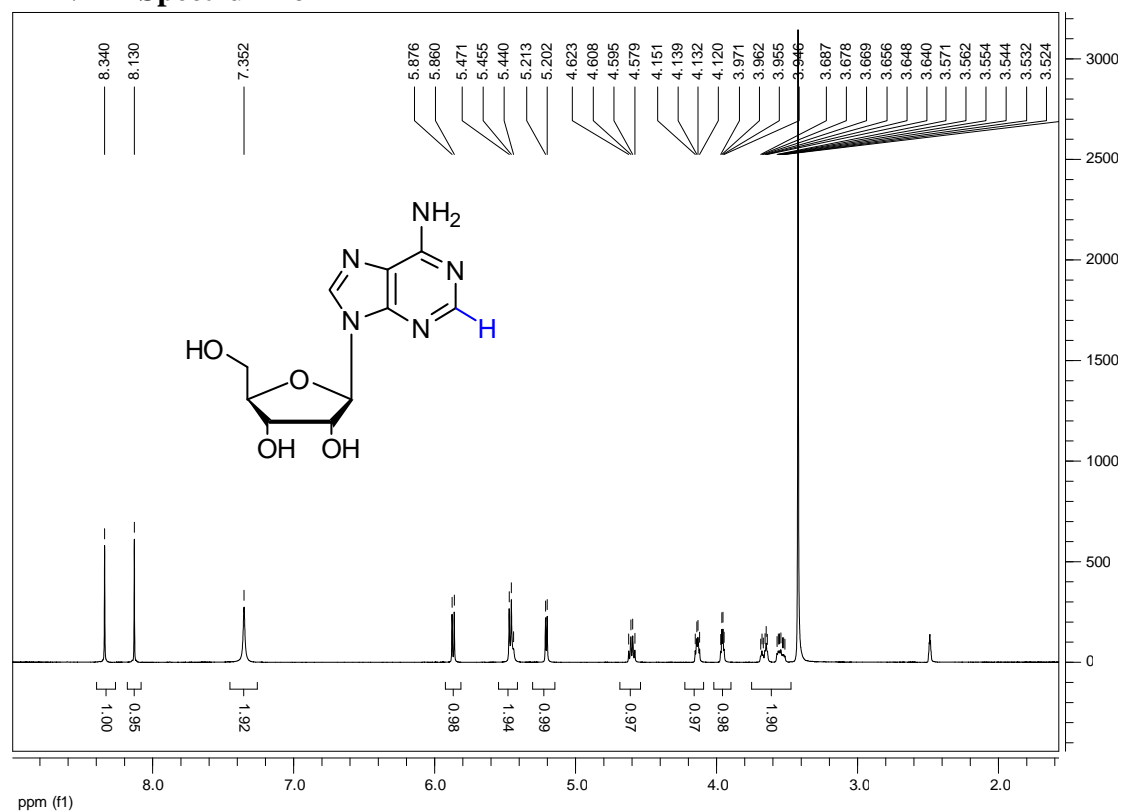

### <sup>13</sup>C NMR Spectrum for 4i

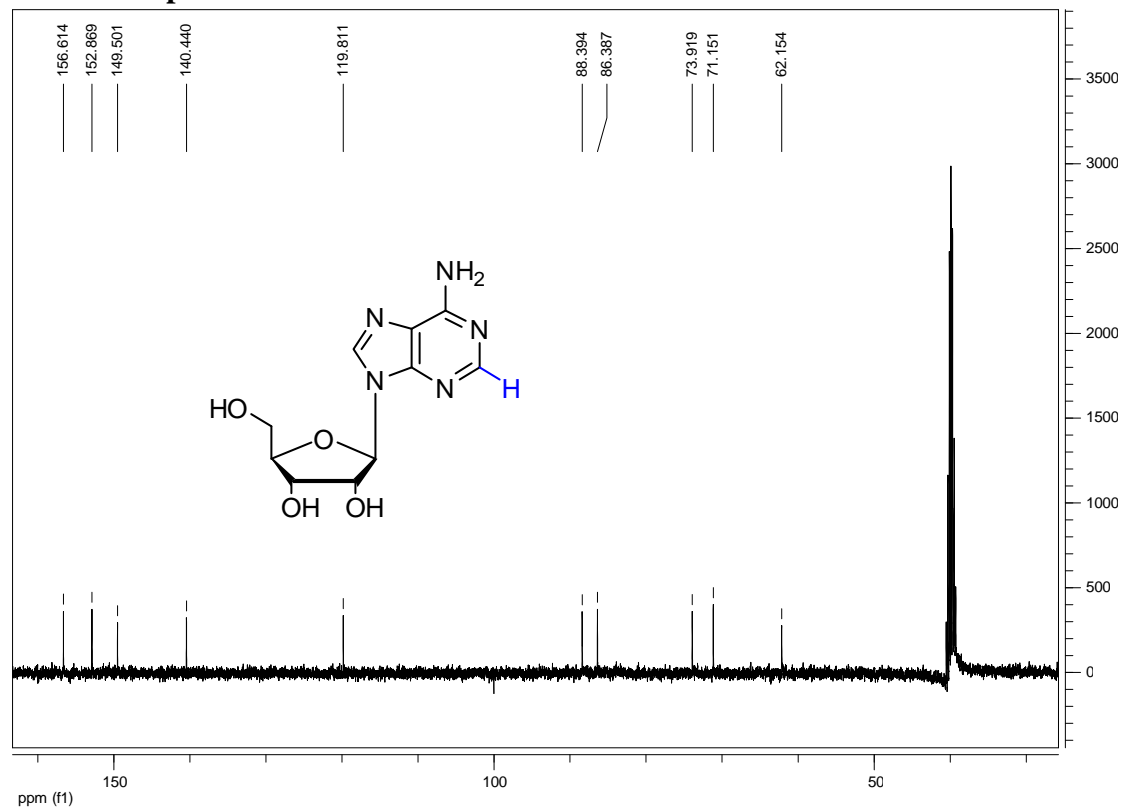





### <sup>1</sup>H NMR Spectrum for 7

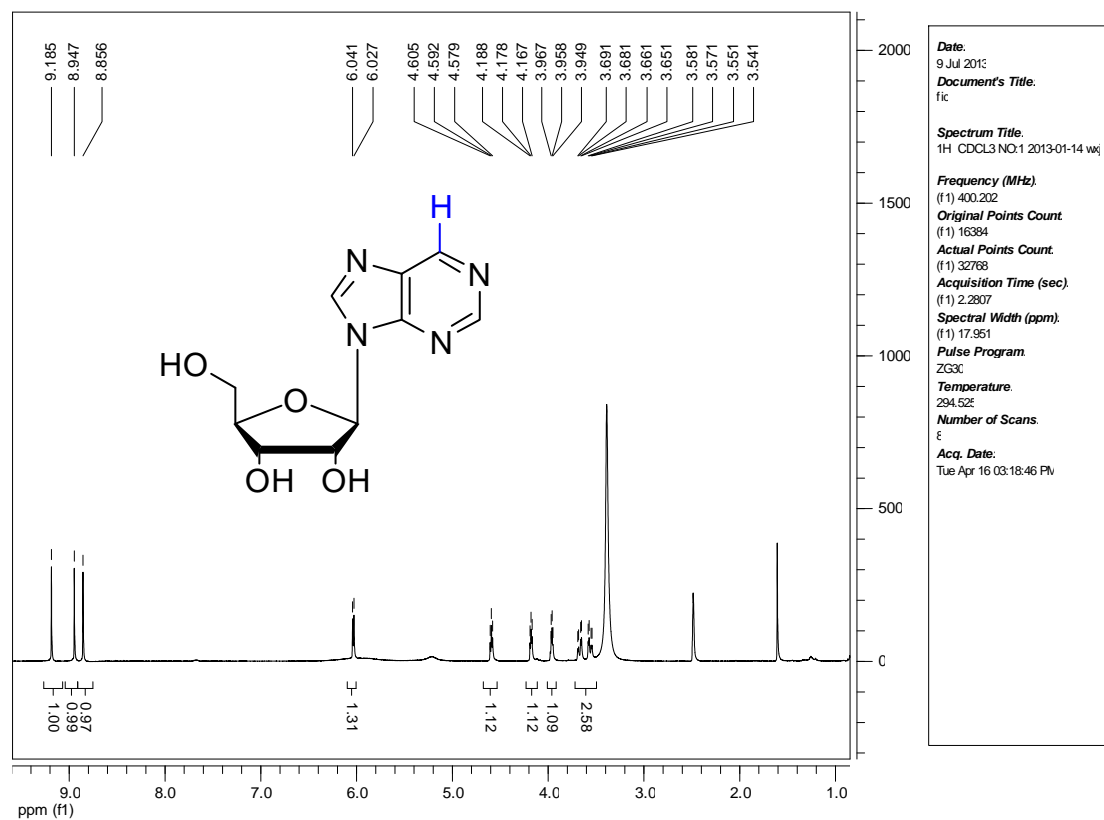

### <sup>13</sup>C NMR Spectrum for 7

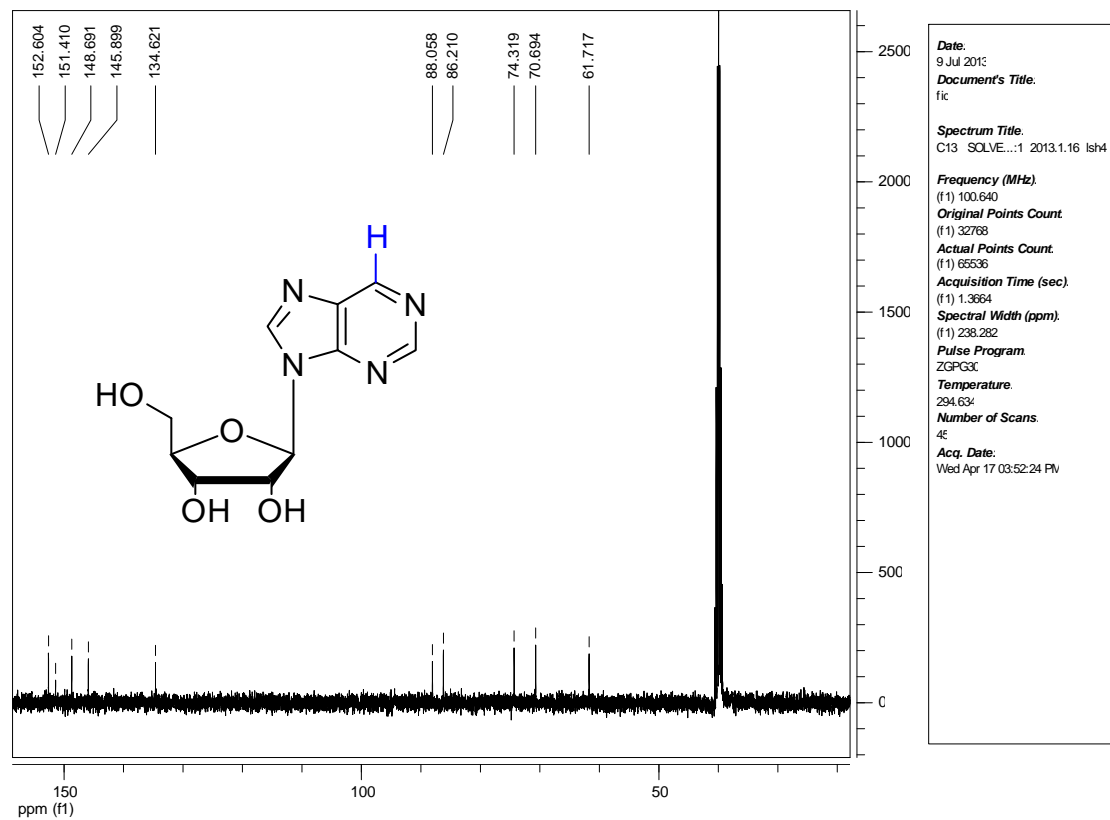

### <sup>1</sup>H NMR Spectrum for 9

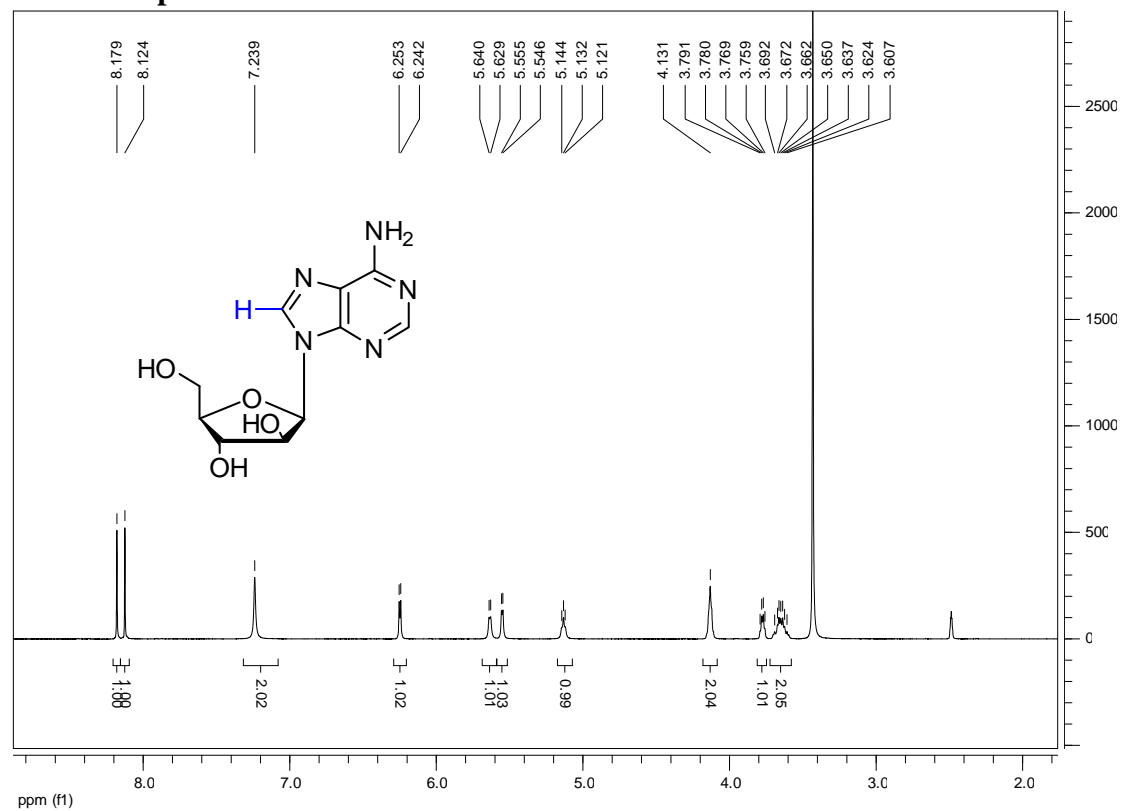

### <sup>13</sup>C NMR Spectrum for 9

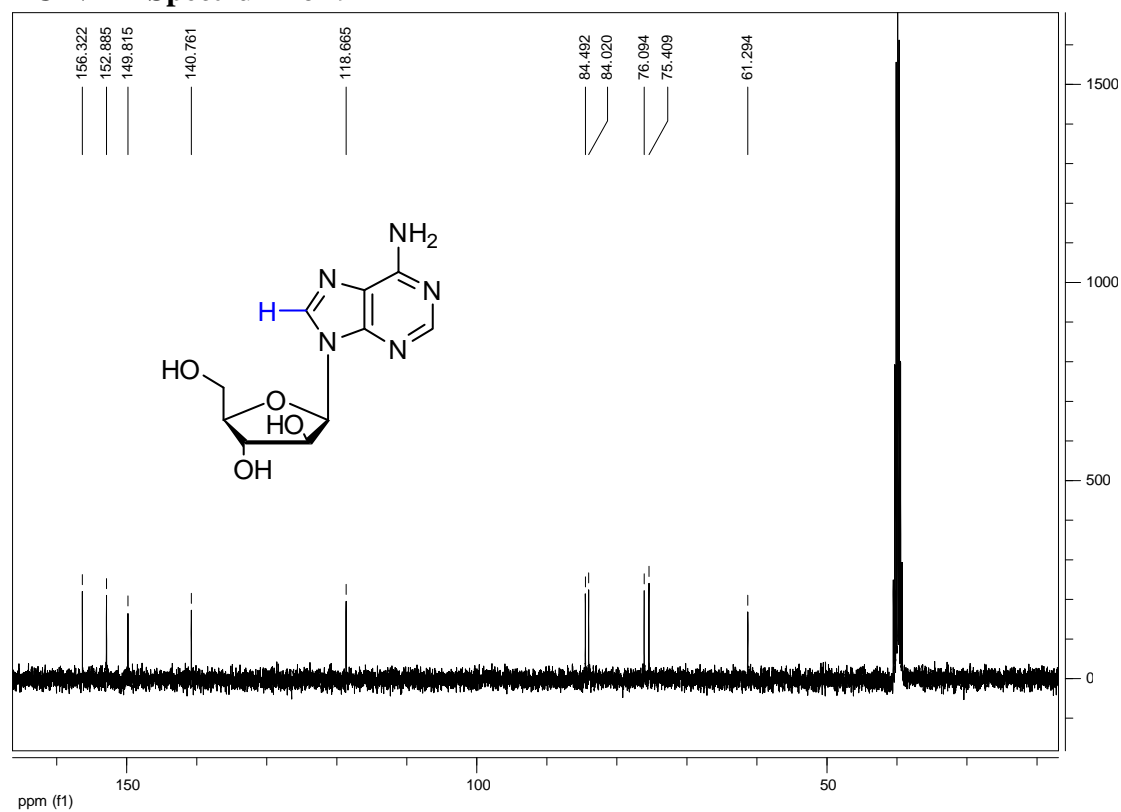

### <sup>1</sup>H NMR Spectrum for 5a

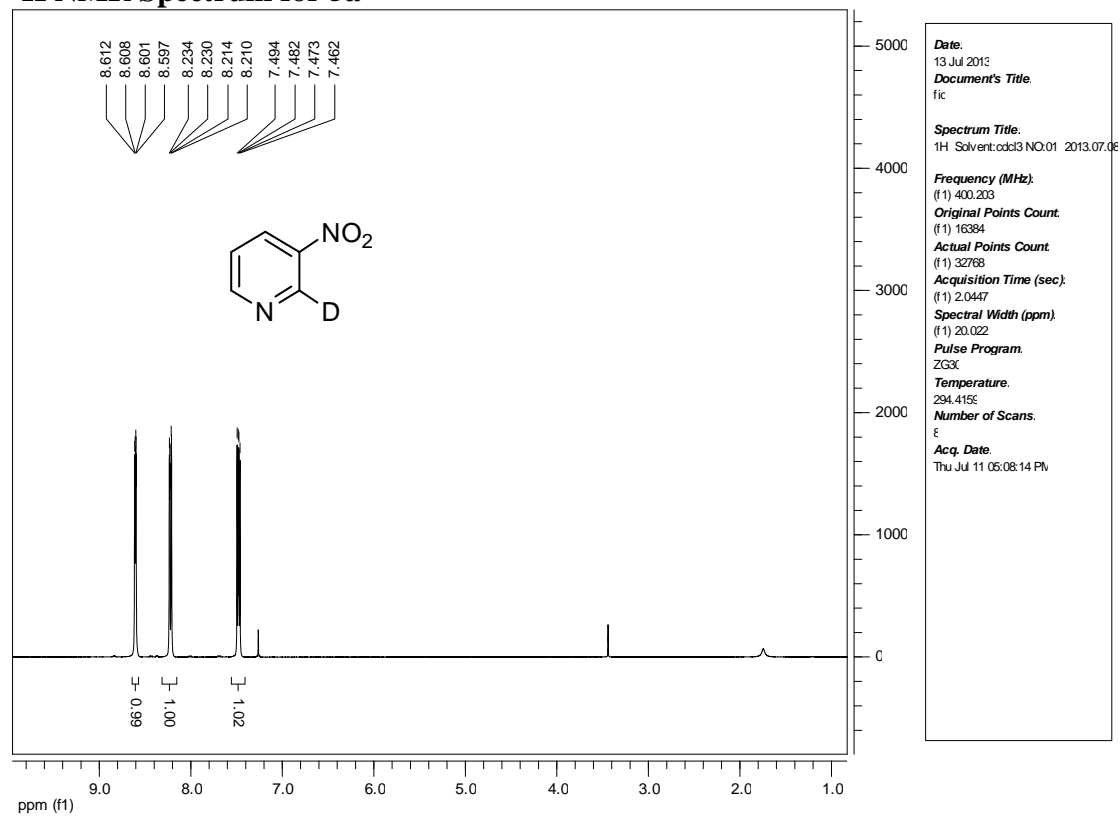

### <sup>13</sup>C NMR Spectrum for 5a

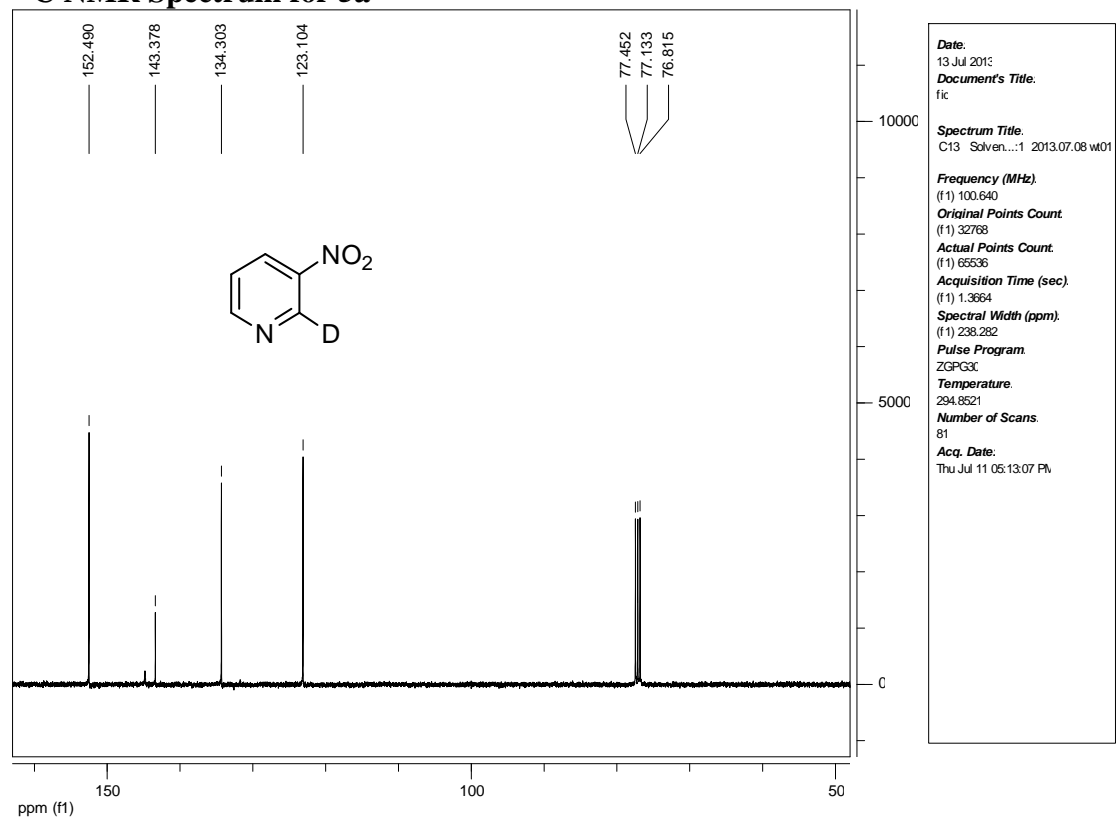

### <sup>1</sup>H NMR Spectrum for 5b

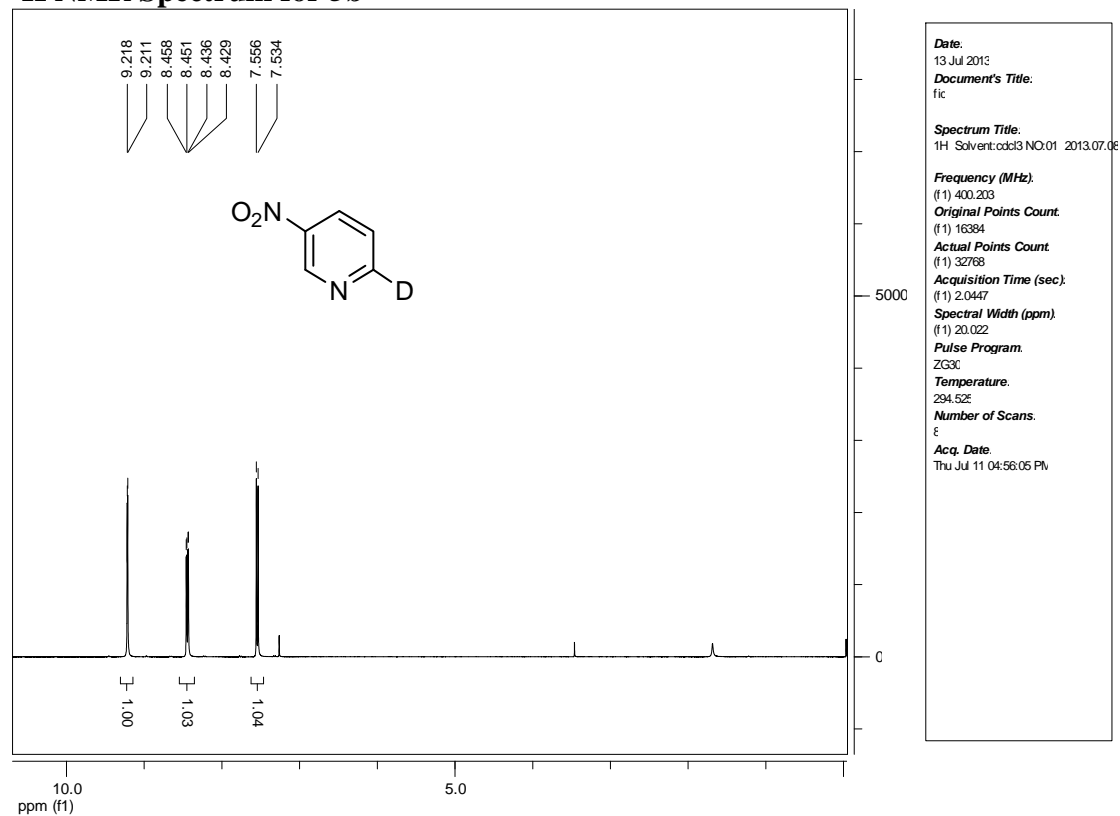

### <sup>13</sup>C NMR Spectrum for 5b

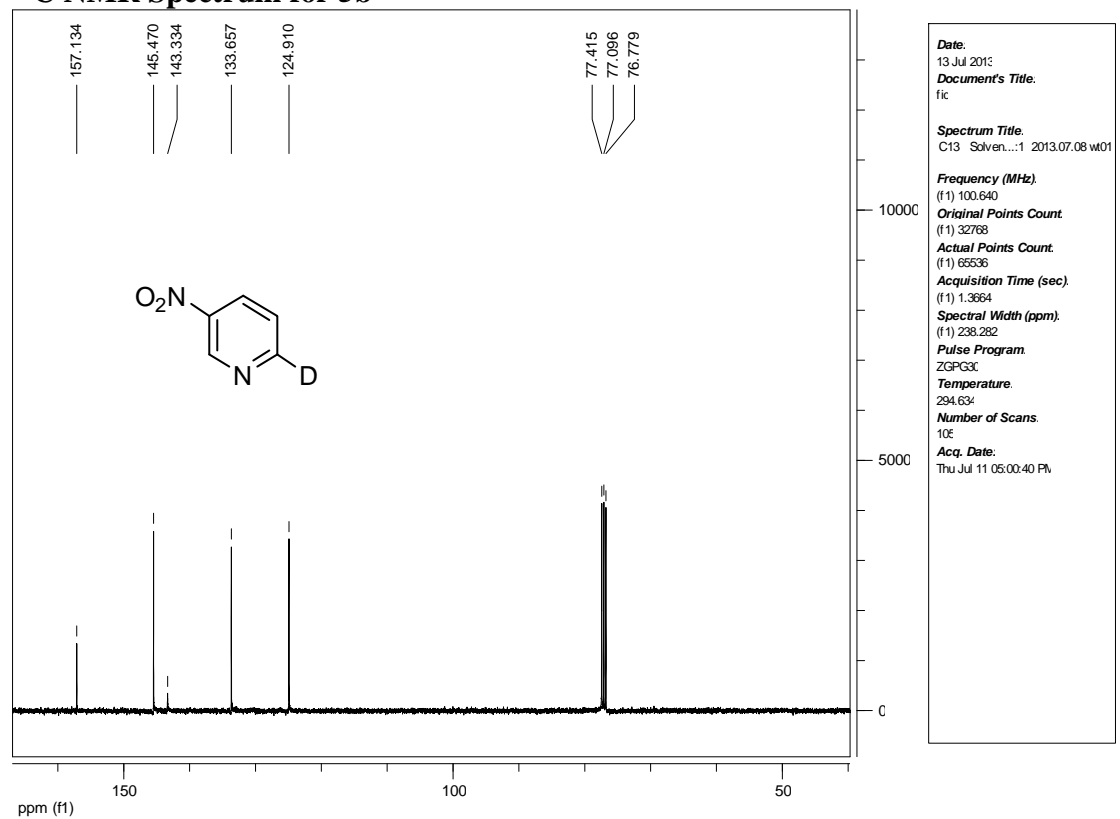

### <sup>1</sup>H NMR Spectrum for 5c

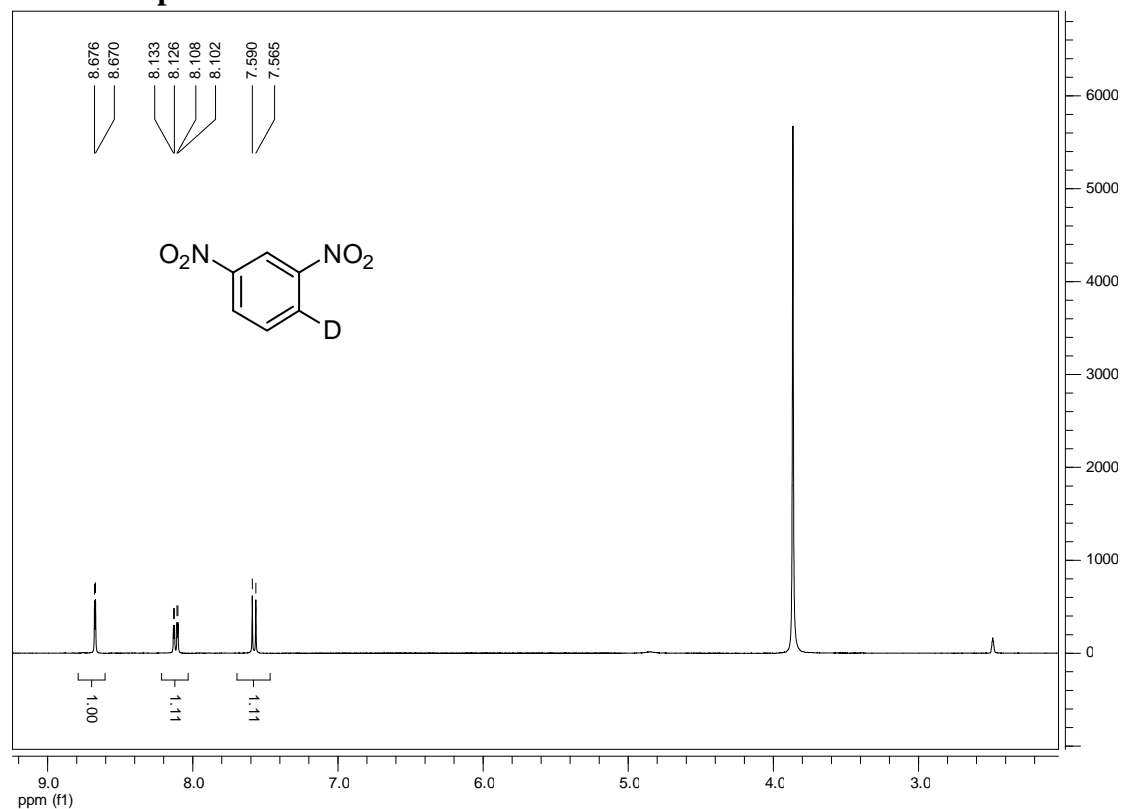

### <sup>13</sup>C NMR Spectrum for 5c

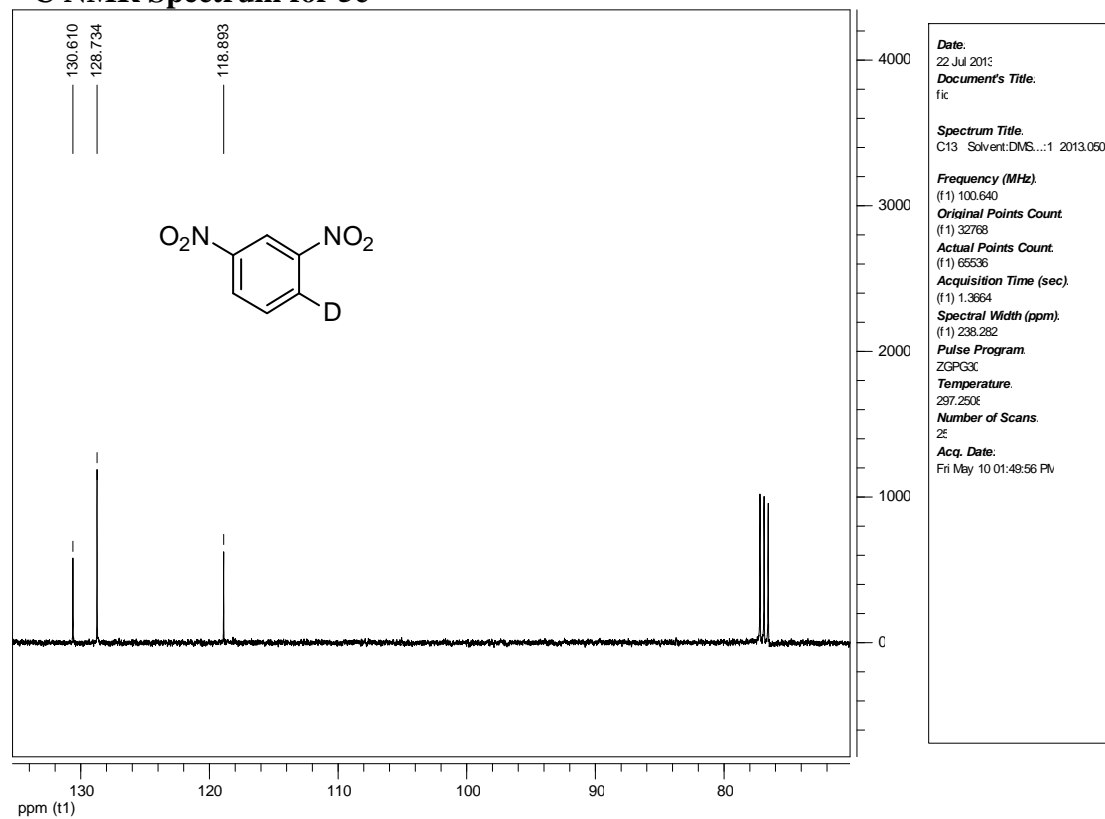

### <sup>1</sup>H NMR Spectrum for 5d

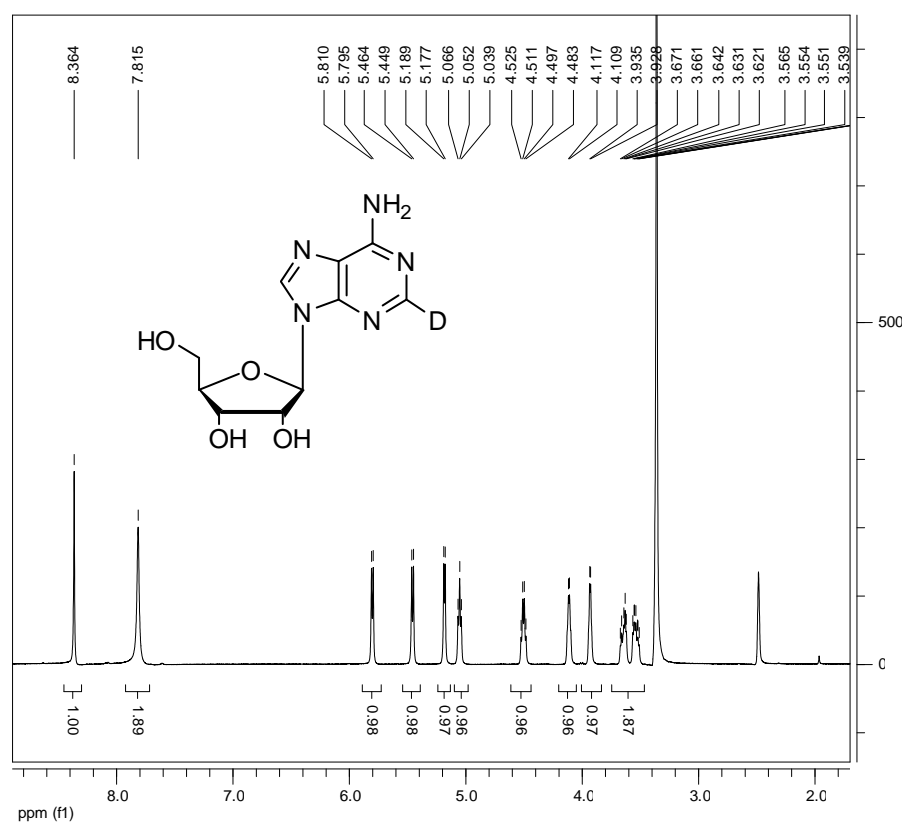

**Date:**  
10 Jul 2013  
**Document's Title:**  
fic  
**Spectrum Title:**  
1H Solvent:CDCl...07 2013.05.16  
**Frequency (MHz):**  
(f1) 400.203  
**Original Points Count:**  
(f1) 16394  
**Actual Points Count:**  
(f1) 32768  
**Acquisition Time (sec):**  
(f1) 2.0447  
**Spectral Width (ppm):**  
(f1) 20.022  
**Pulse Program:**  
ZG30  
**Temperature:**  
706.996  
**Number of Scans:**  
6  
**Acq. Date:**  
Fri May 17 05:08:33 PM

### <sup>13</sup>C NMR Spectrum for 5d

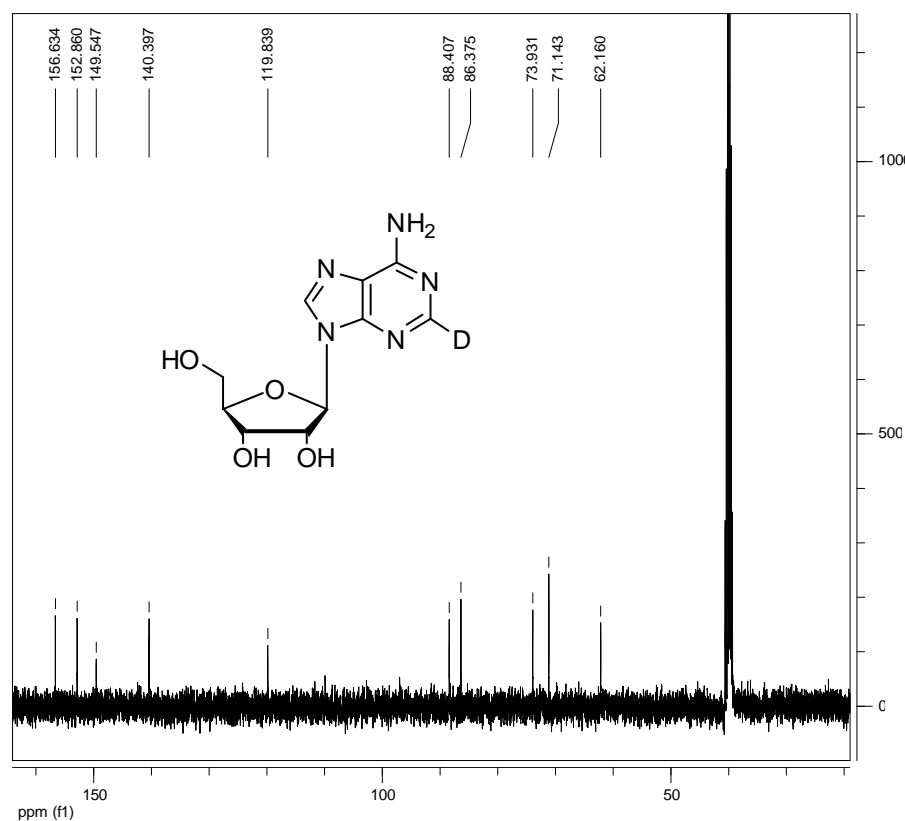

**Date:**  
10 Jul 2013  
**Document's Title:**  
fic  
**Spectrum Title:**  
C13 Solvent:cdcl...1 2013.05.13  
**Frequency (MHz):**  
(f1) 100.640  
**Original Points Count:**  
(f1) 32768  
**Actual Points Count:**  
(f1) 65536  
**Acquisition Time (sec):**  
(f1) 1.3664  
**Spectral Width (ppm):**  
(f1) 238.262  
**Pulse Program:**  
ZGPG30  
**Temperature:**  
706.996  
**Number of Scans:**  
36  
**Acq. Date:**  
Fri May 17 05:03:13 PM

### <sup>1</sup>H NMR Spectrum for 5e

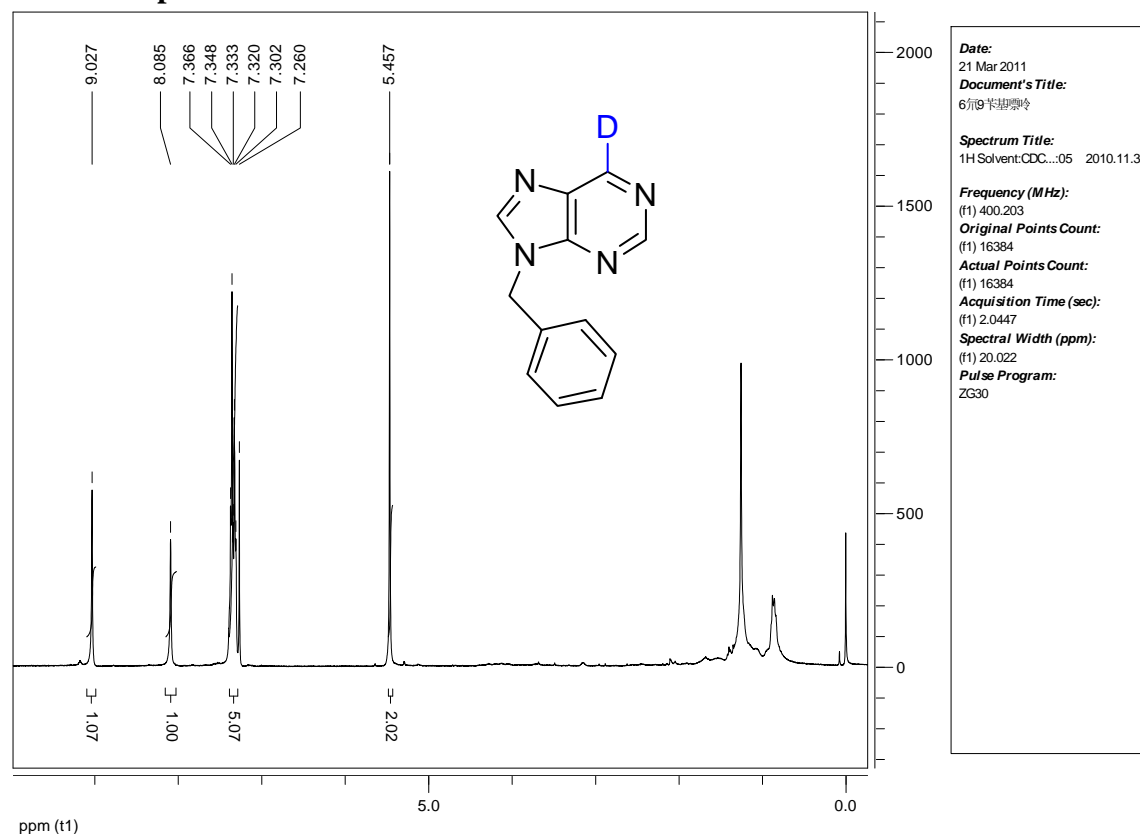

### <sup>13</sup>C NMR Spectrum for 5e

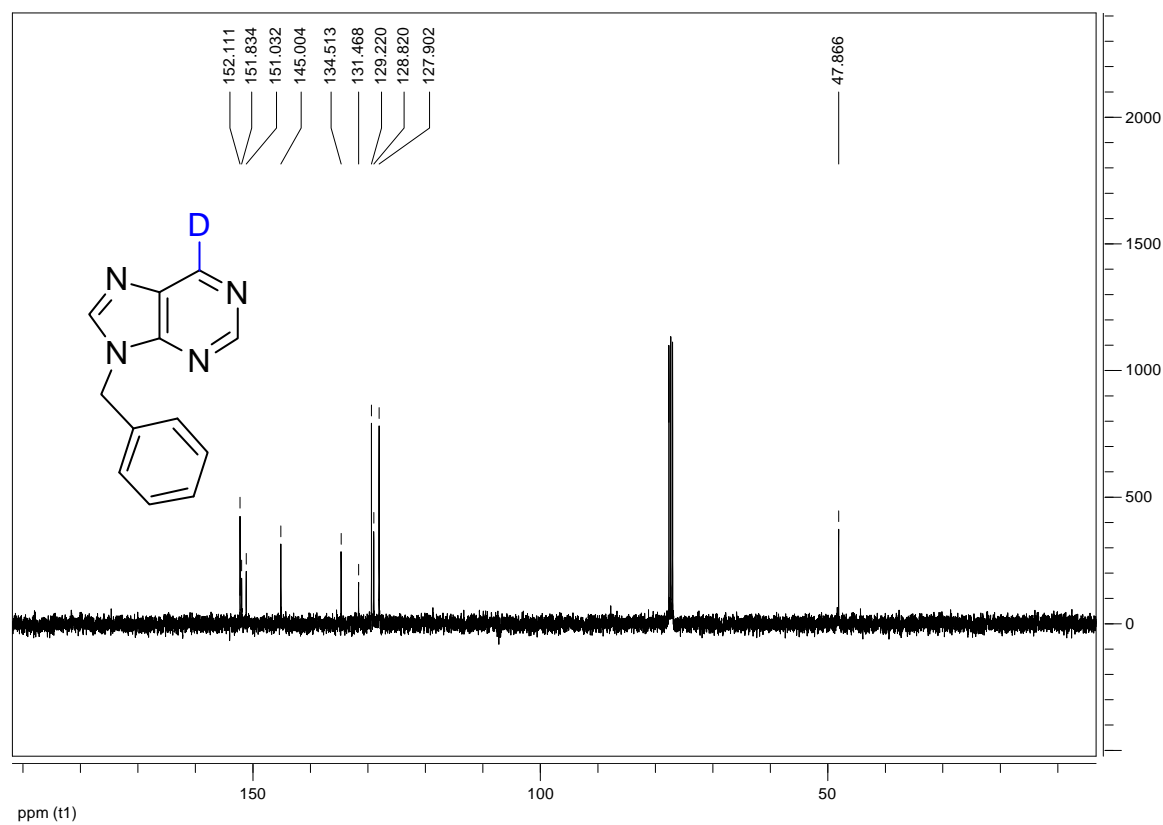



### <sup>1</sup>H NMR Spectrum for 5f

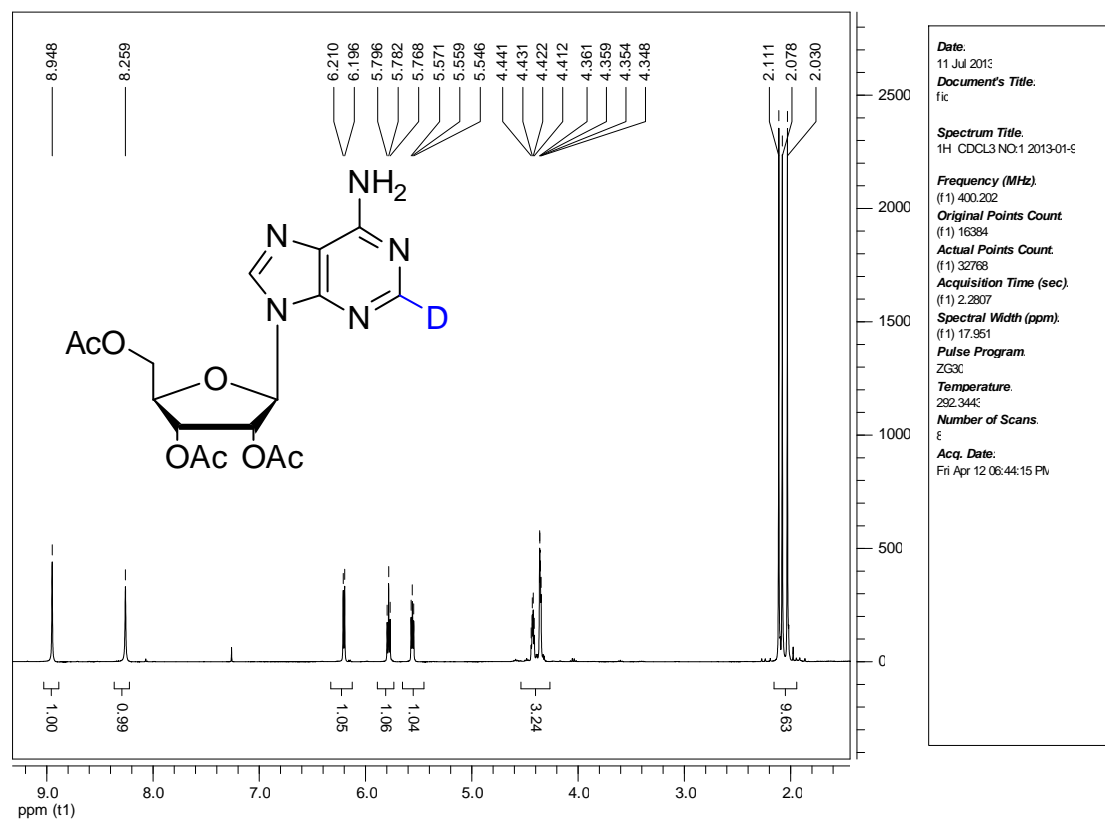

### <sup>13</sup>C NMR Spectrum for 5f

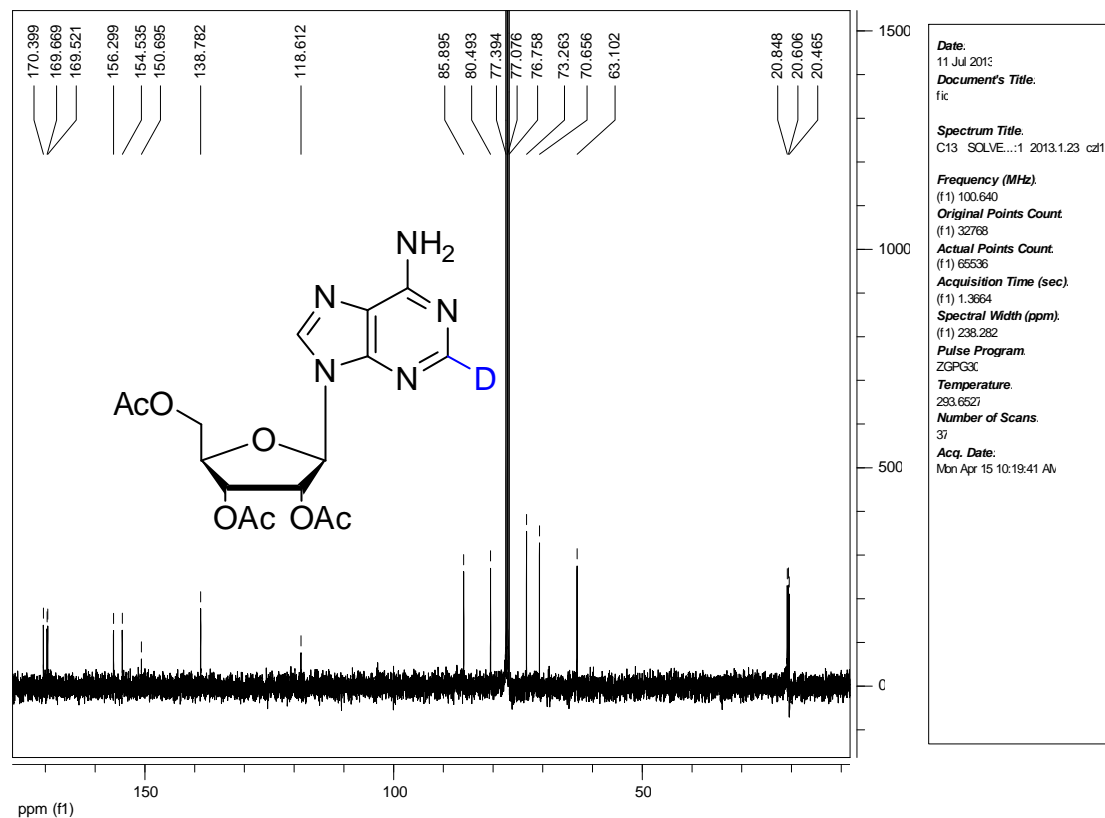

### <sup>1</sup>H NMR Spectrum for 2a-H/D

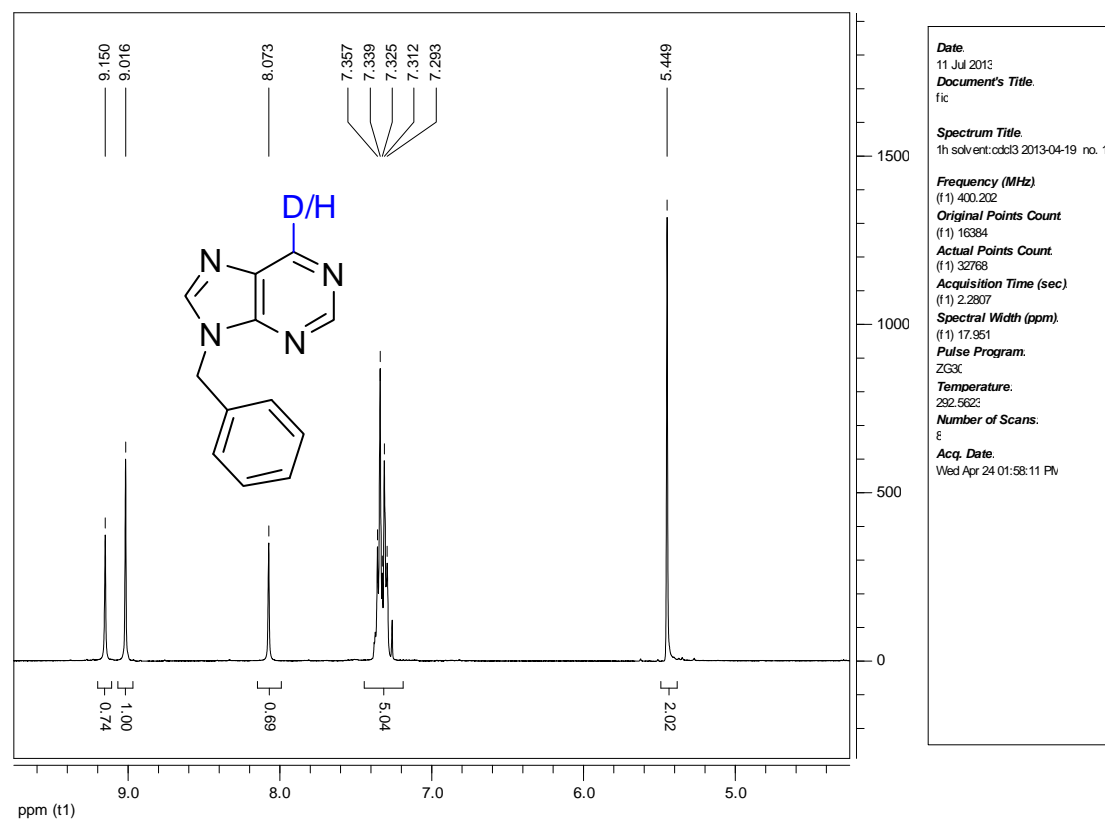

Supplement: c3gc41658e.pdf [file c3gc41658e.pdf]
